# Supplementary material for: Synthesis and biological evaluation of sapinofuranones A,B and 1,2,3-triazole-sapinofuranone hybrids as cytotoxic agents
Source: Royal Society of Chemistry journal article supplement (doi:10.1039/c6ra21939j), 2016-01-01
Supplement: c6ra21939j1.pdf [file c6ra21939j1.pdf]

*Supporting Information*

Synthesis and biological evaluation of Sapinofuranones A,B and 1,2,3-triazole-  
Sapinofuranone hybrids as cytotoxic agents

K. Siva Nagi Reddy,<sup>a,c</sup> Gowravaram Sabitha,<sup>a,c\*</sup> Y. Poornachandra<sup>b</sup> and C. Ganesh Kumar<sup>b</sup>

<sup>a</sup>Natural Products Chemistry Division and <sup>b</sup>Medicinal chemistry & pharmacology Division, CSIR-Indian Institute of Chemical Technology, Hyderabad 500007, India.

<sup>c</sup>Academy of Scientific and Innovative Research (AcSIR), New Delhi 110020, India

Corresponding author: Tel.: +91-40-27191629; fax: +91-40-27160512

e-mail: [gowravaramsr@yahoo.com](mailto:gowravaramsr@yahoo.com), [sabitha@iiict.res.in](mailto:sabitha@iiict.res.in)

1. <sup>1</sup>H NMR and <sup>13</sup>C NMR Spectra of All Compounds

2 – 54

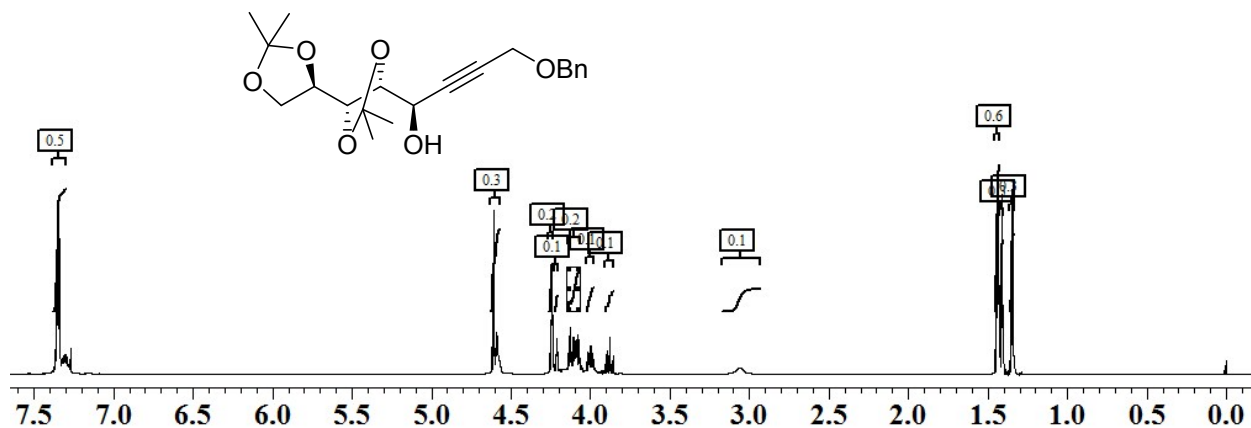

$^1\text{H}$  NMR SPECTRUM (400 MHz,  $\text{CDCl}_3$ )

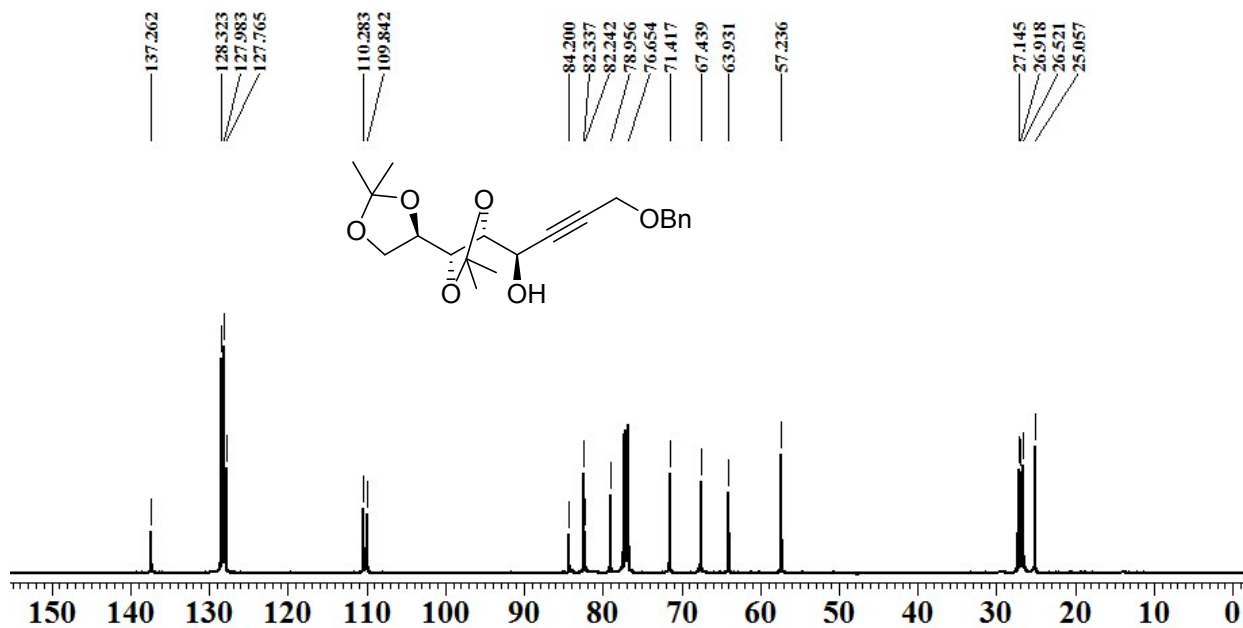

$^{13}\text{C}$  NMR SPECTRUM (125 MHz,  $\text{CDCl}_3$ )

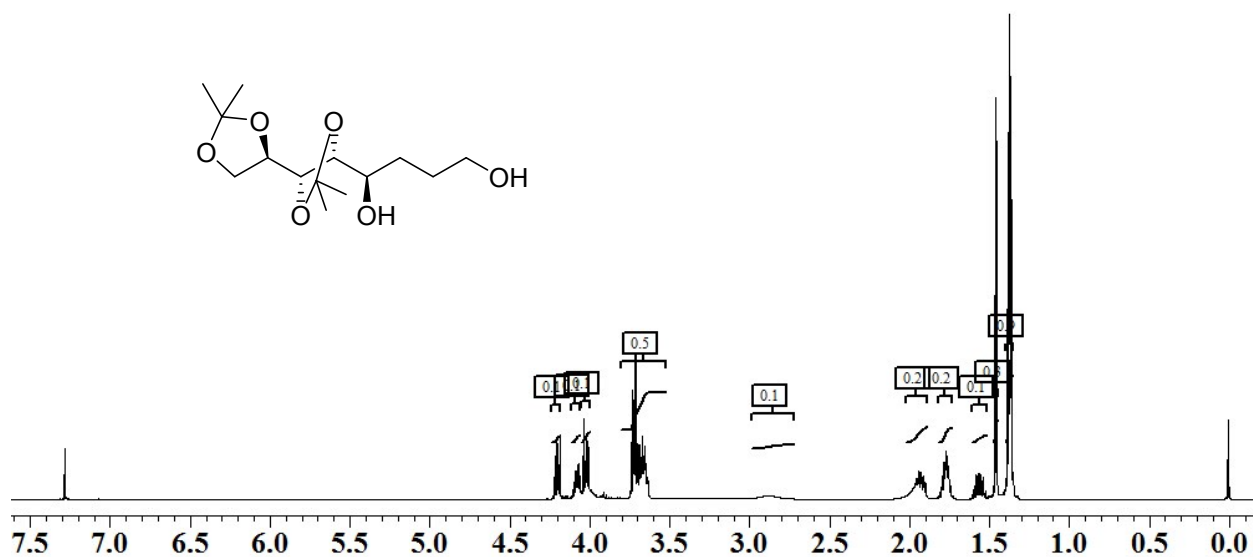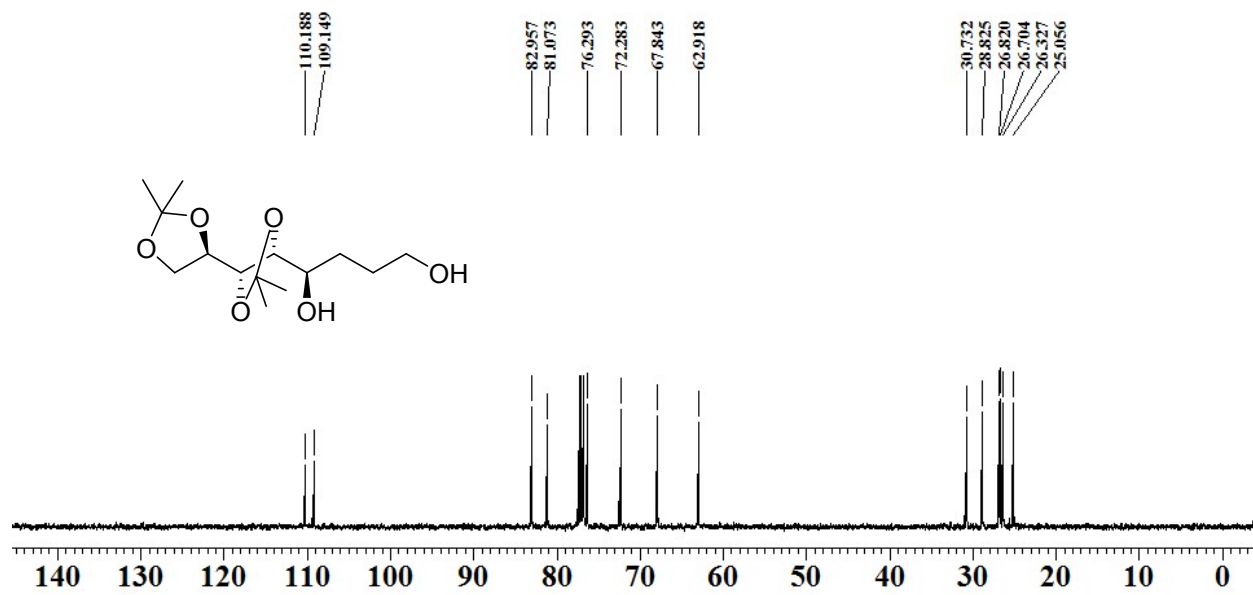

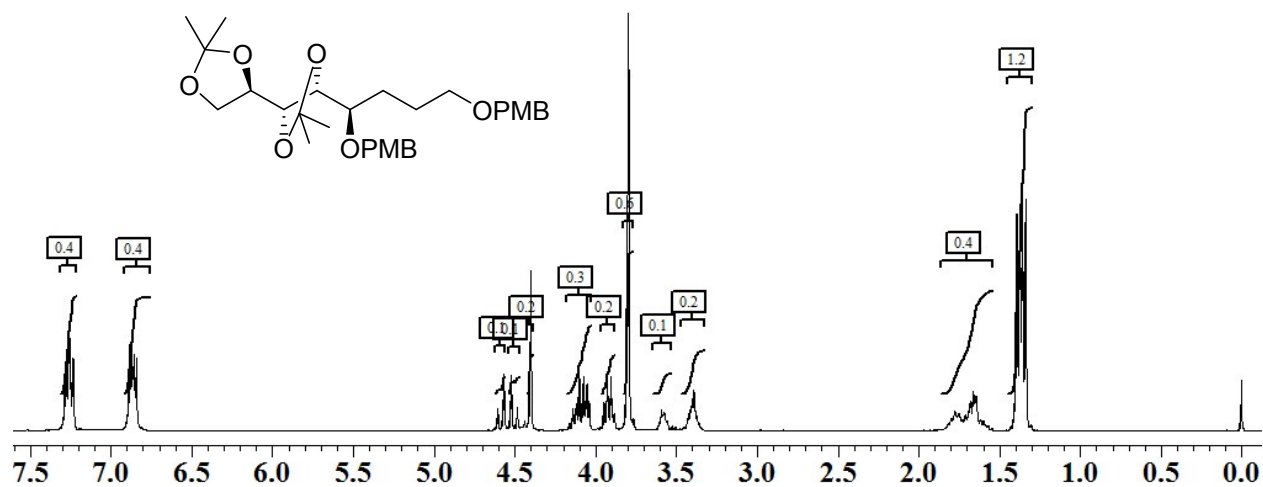

**<sup>1</sup>H NMR SPECTRUM (300 MHz, CDCl<sub>3</sub>)**

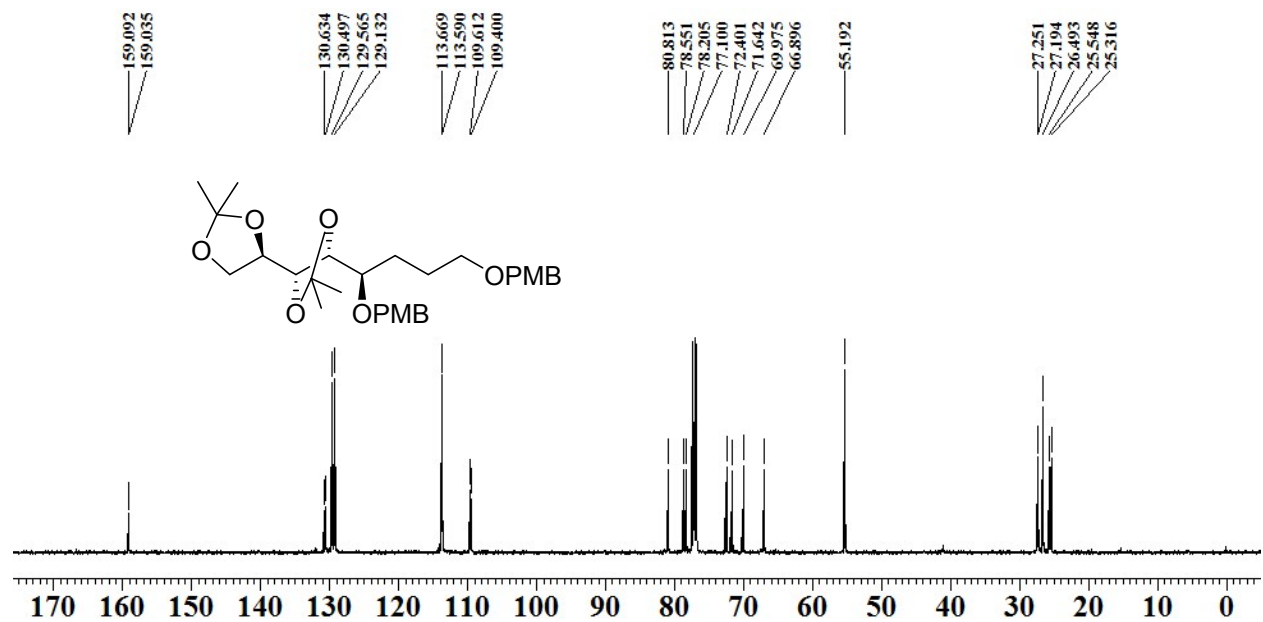

**<sup>13</sup>C NMR SPECTRUM (125 MHz, CDCl<sub>3</sub>)**

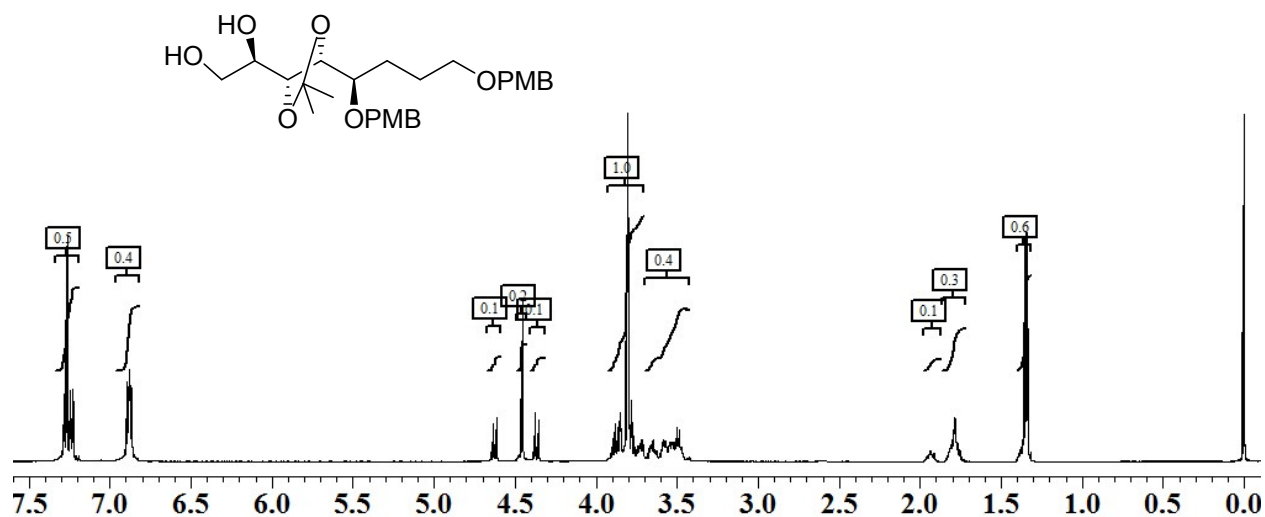

**<sup>1</sup>H NMR SPECTRUM (500 MHz, CDCl<sub>3</sub>)**

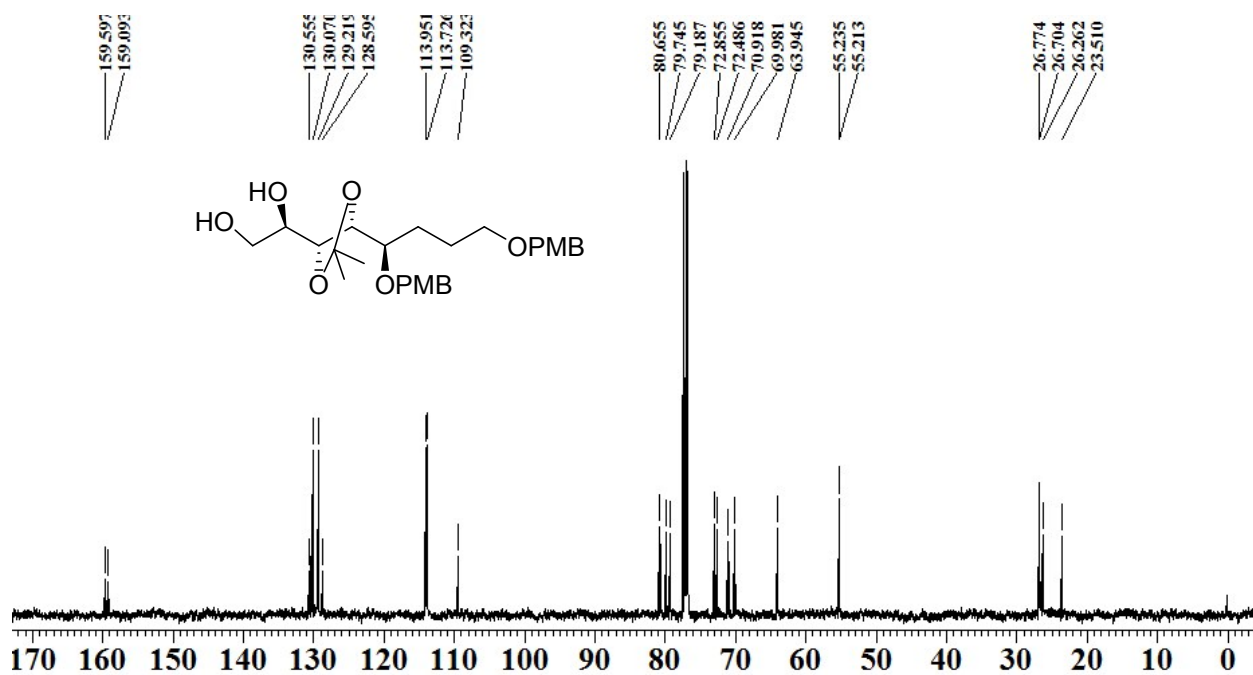

**<sup>13</sup>C NMR SPECTRUM (125 MHz, CDCl<sub>3</sub>)**

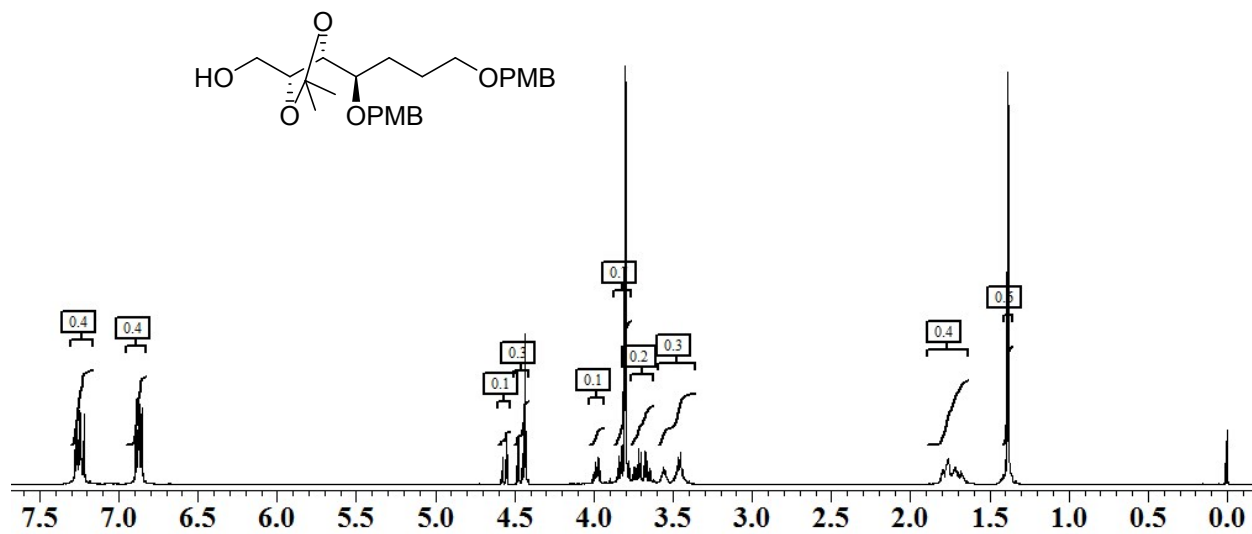

**<sup>1</sup>H NMR SPECTRUM (400 MHz, CDCl<sub>3</sub>)**

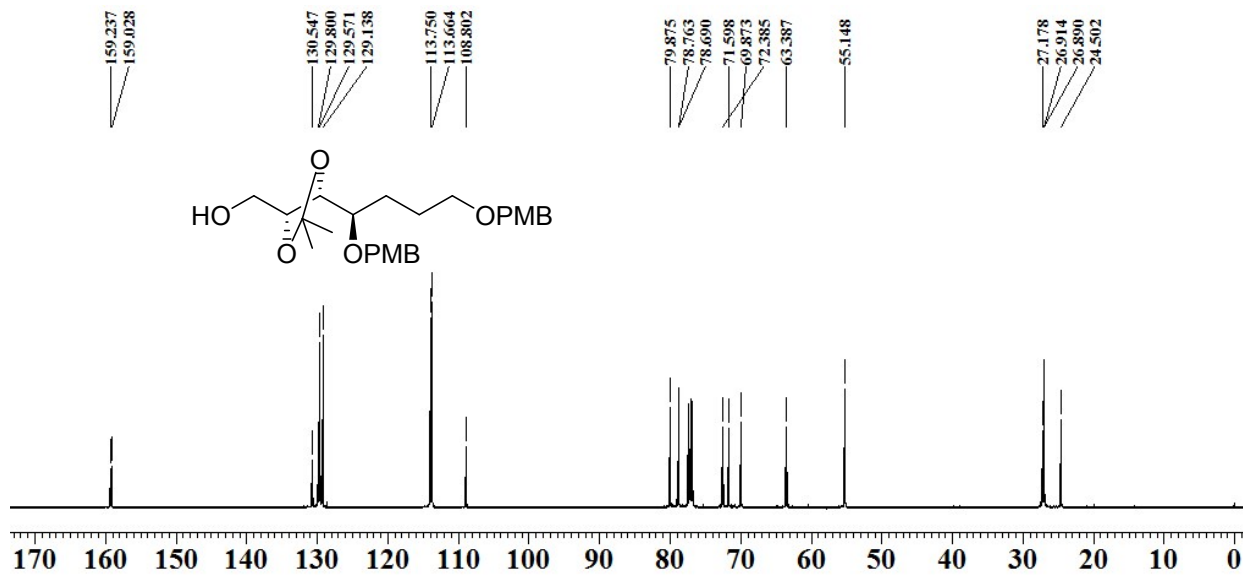

**<sup>13</sup>C NMR SPECTRUM (125 MHz, CDCl<sub>3</sub>)**

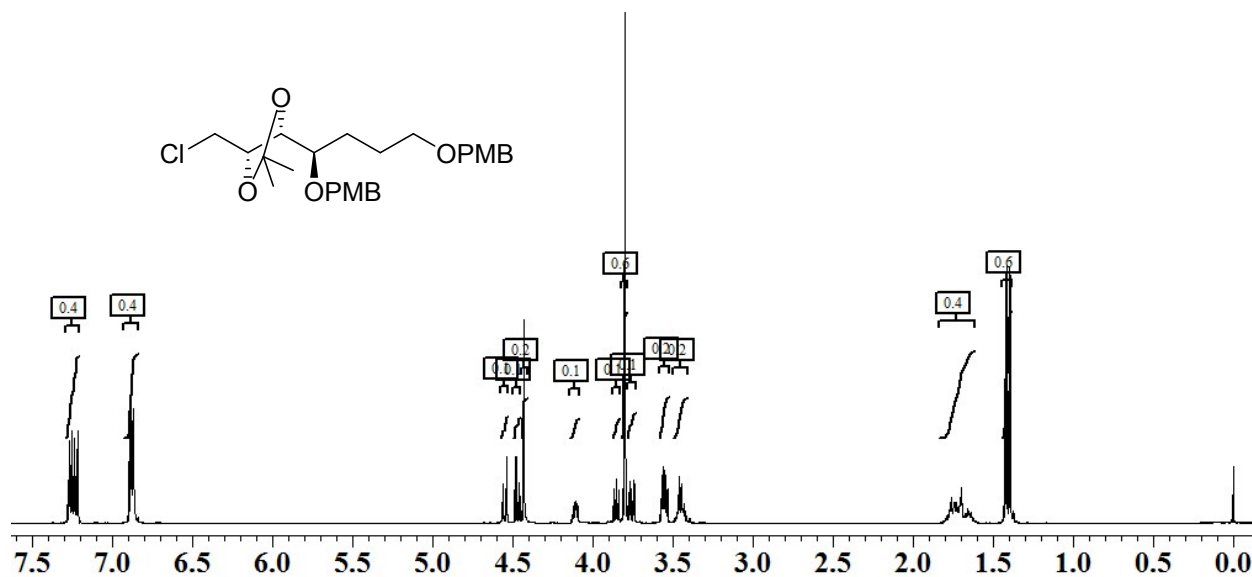

<sup>1</sup>H NMR SPECTRUM (500 MHz, CDCl<sub>3</sub>)

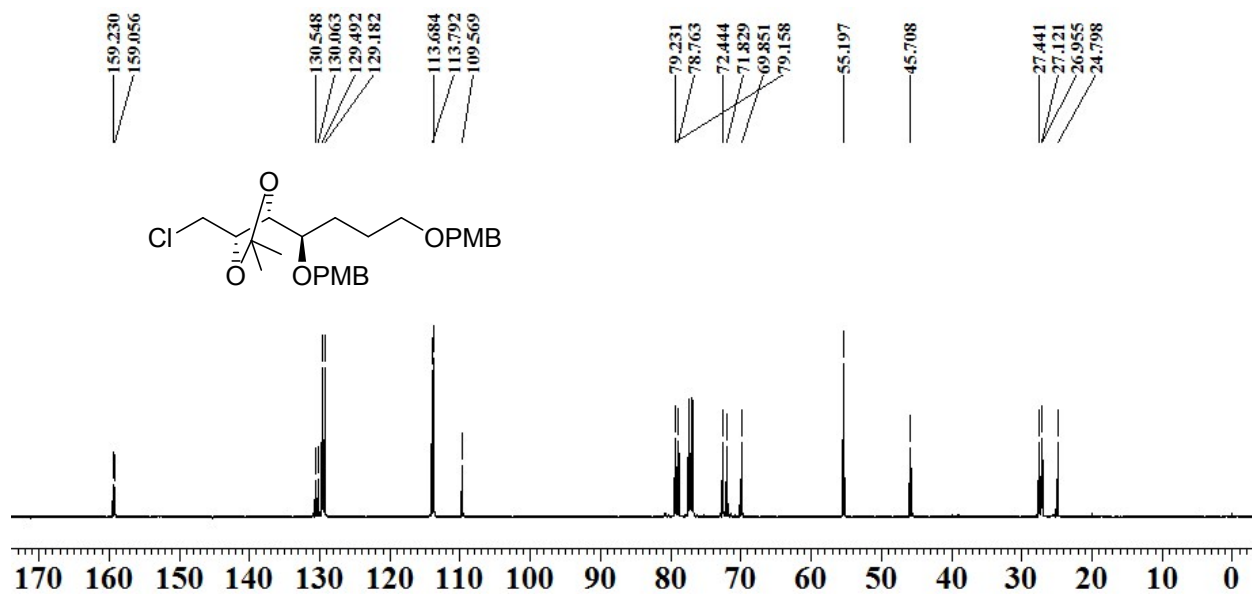

<sup>13</sup>C NMR SPECTRUM (125 MHz, CDCl<sub>3</sub>)

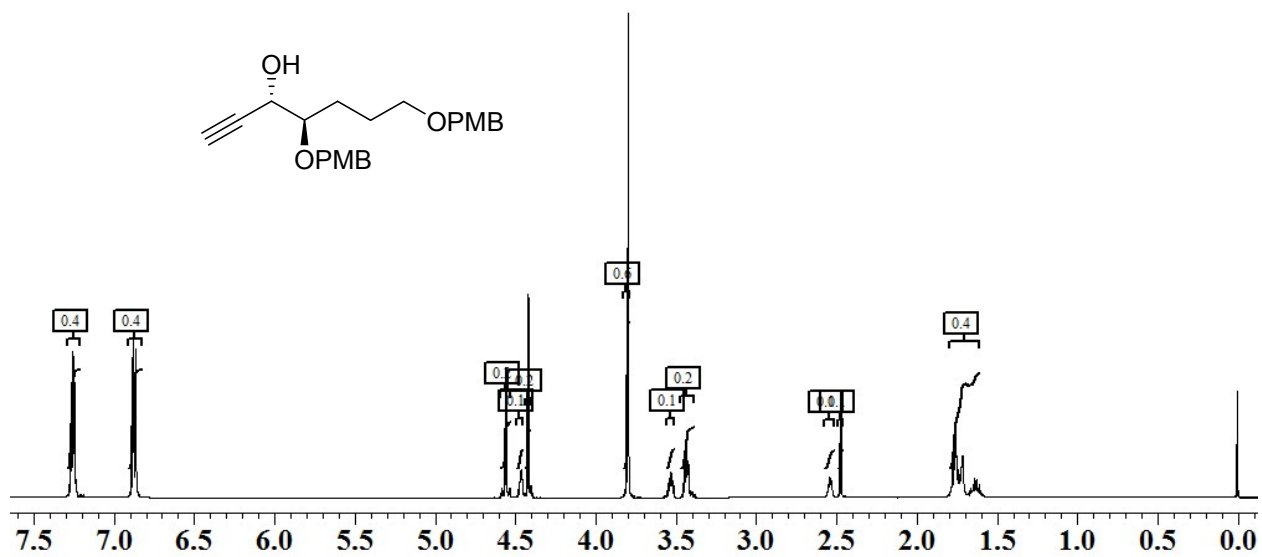

<sup>1</sup>H NMR SPECTRUM (500 MHz, CDCl<sub>3</sub>)

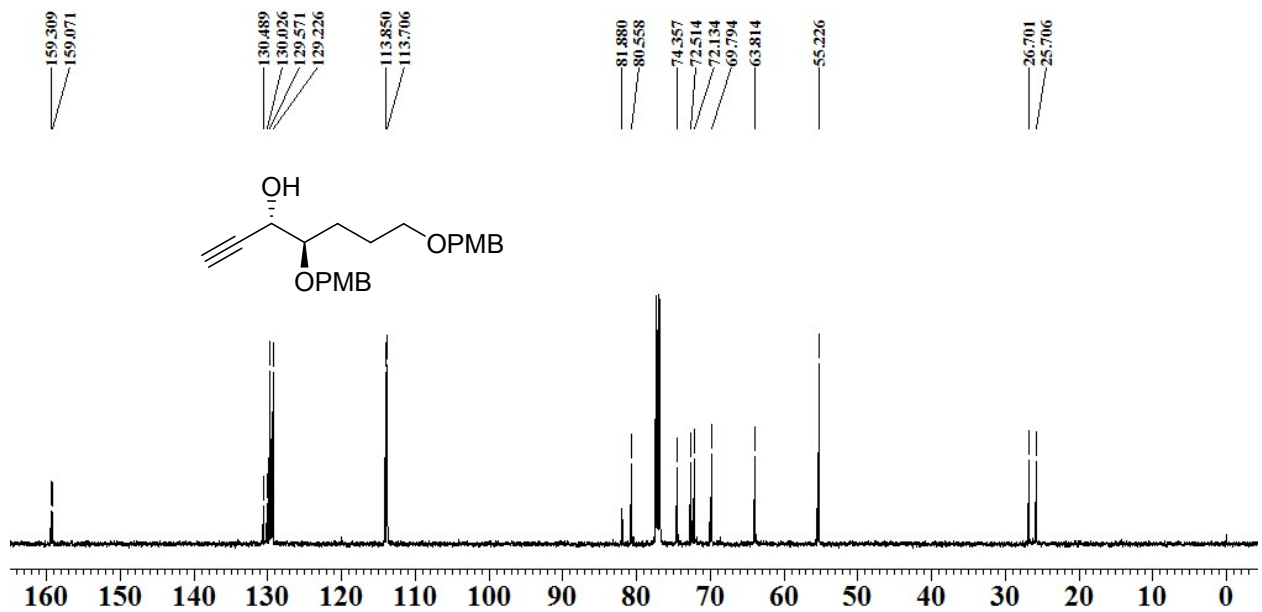

<sup>13</sup>C NMR SPECTRUM (125 MHz, CDCl<sub>3</sub>)



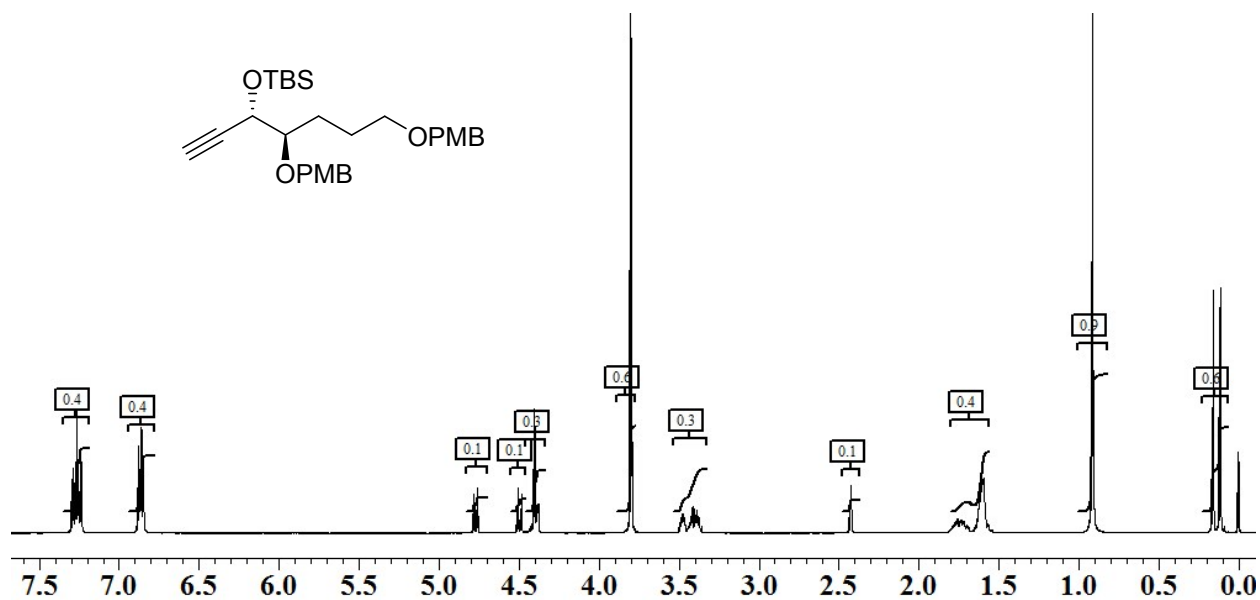

**<sup>1</sup>H NMR SPECTRUM (500 MHz, CDCl<sub>3</sub>)**

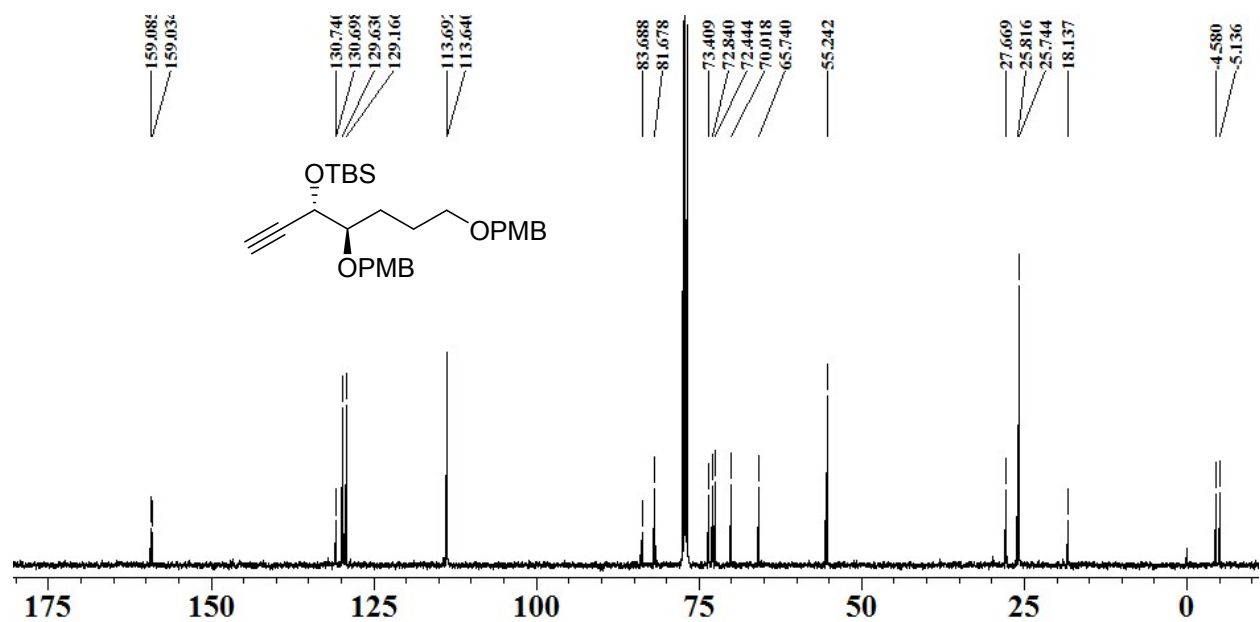

**<sup>13</sup>C NMR SPECTRUM (125 MHz, CDCl<sub>3</sub>)**

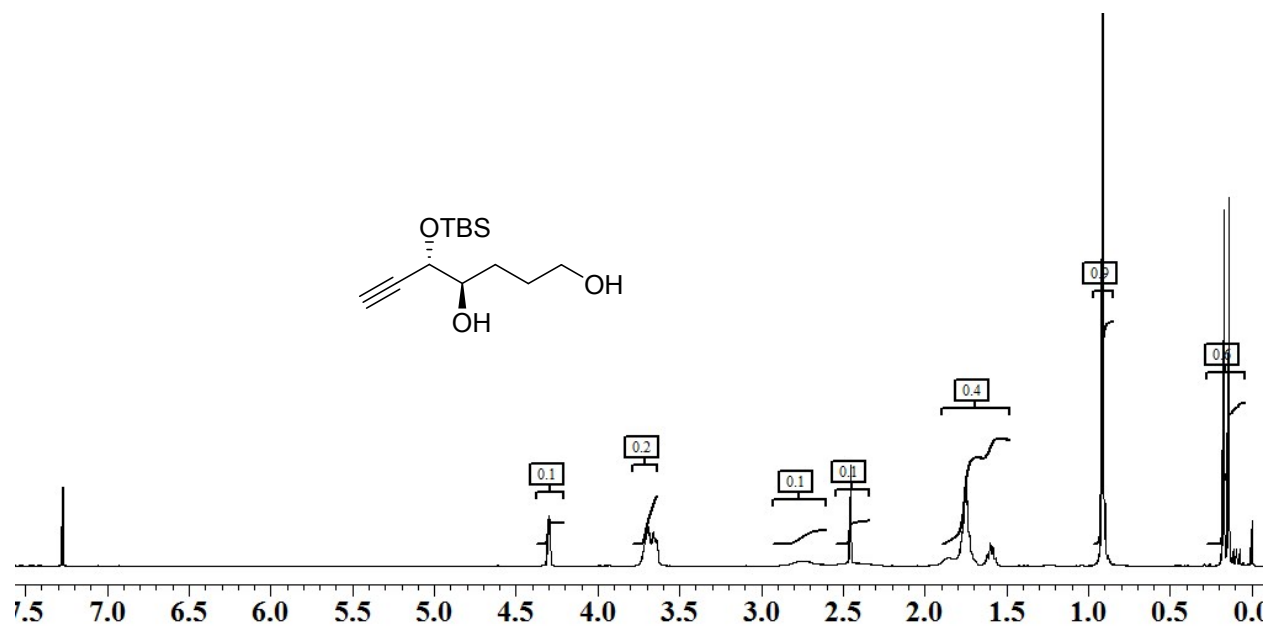

<sup>1</sup>H NMR SPECTRUM (500 MHz, CDCl<sub>3</sub>)

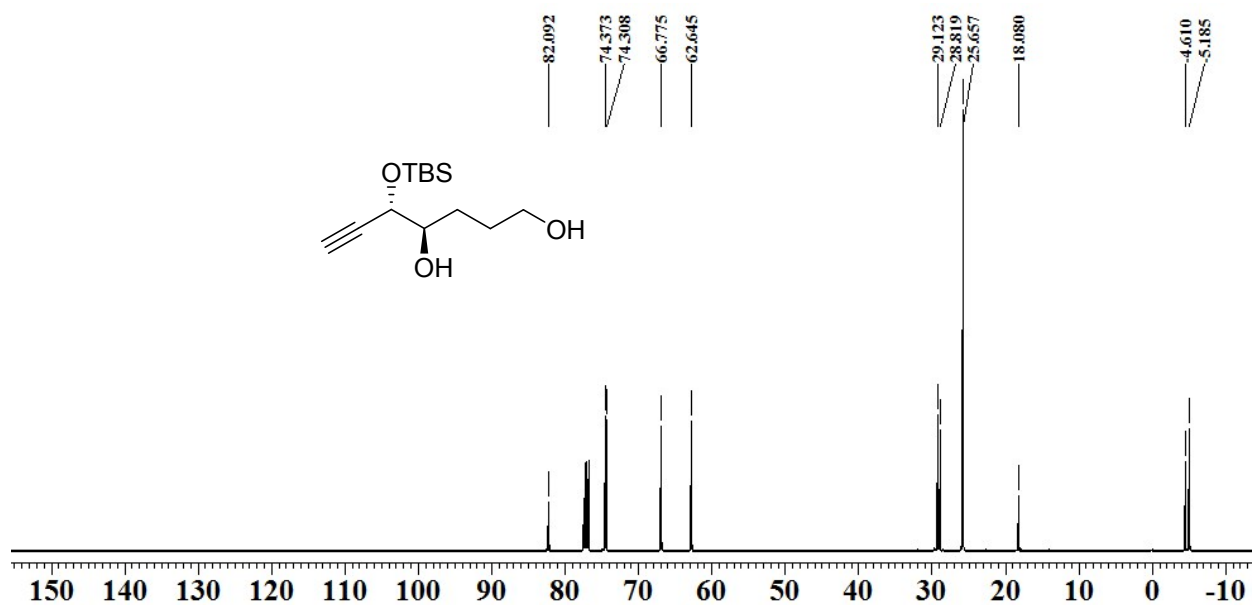

<sup>13</sup>C NMR SPECTRUM (125 MHz, CDCl<sub>3</sub>)

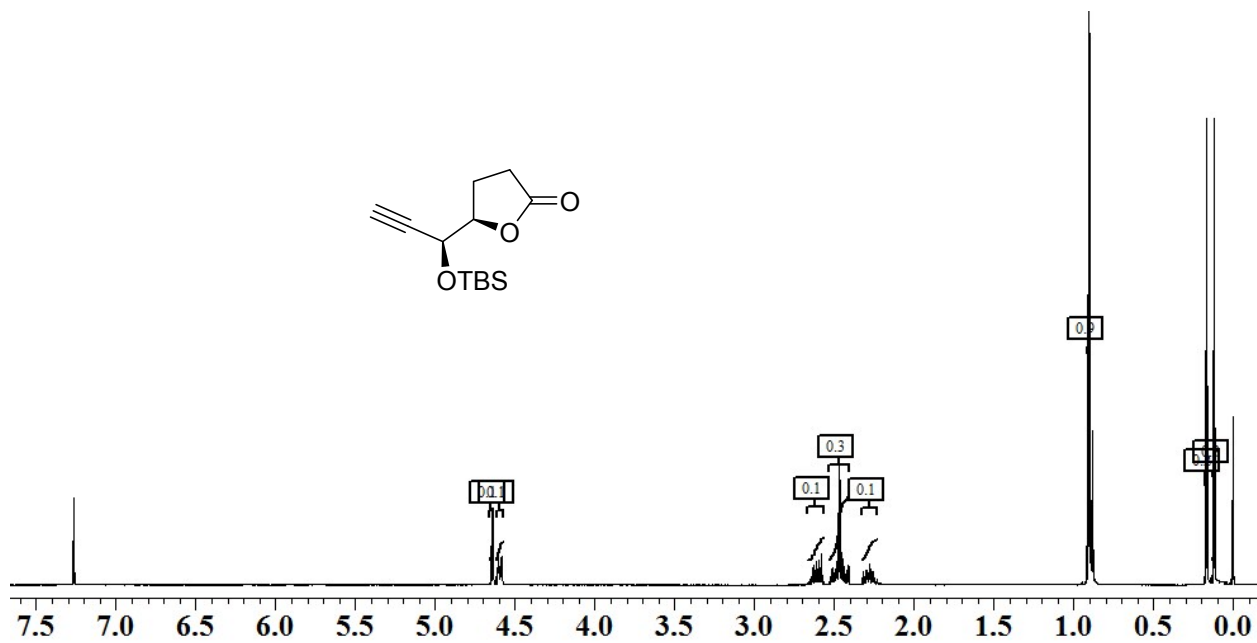

<sup>1</sup>H NMR SPECTRUM (500 MHz, CDCl<sub>3</sub>)

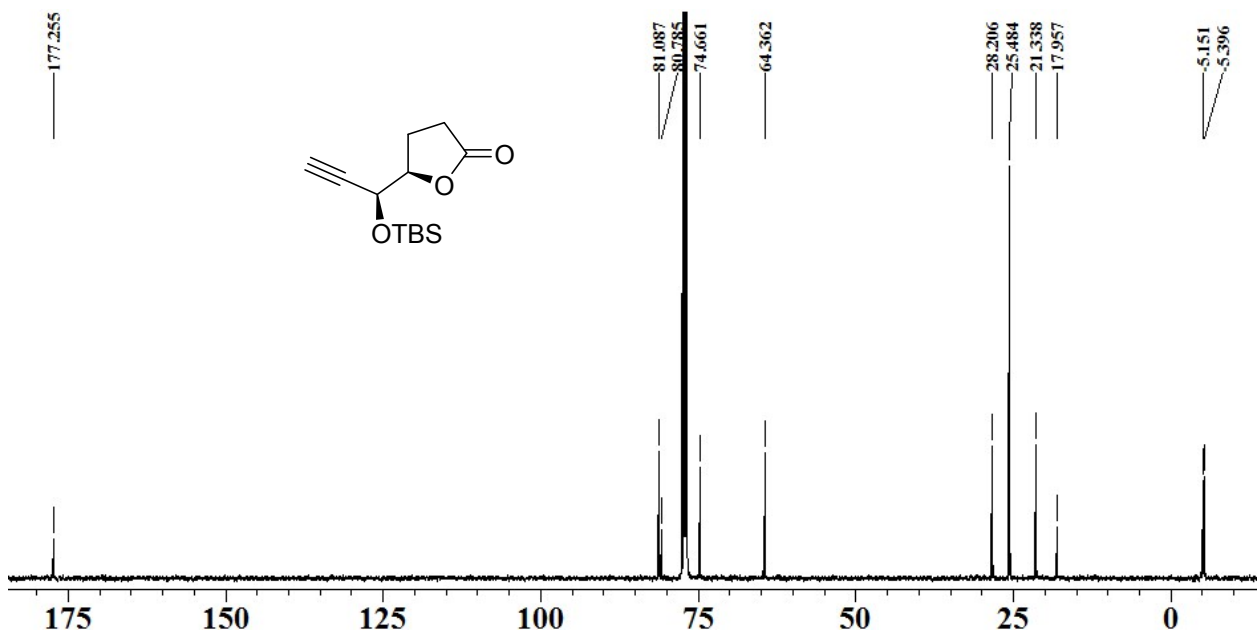

<sup>13</sup>C NMR SPECTRUM (125 MHz, CDCl<sub>3</sub>)

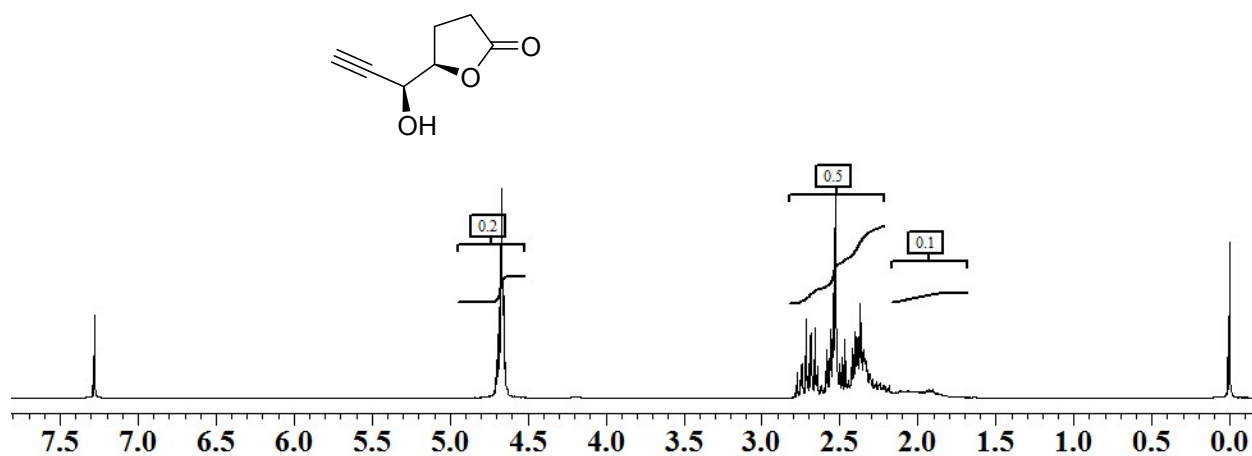

$^1\text{H}$  NMR SPECTRUM (300 MHz,  $\text{CDCl}_3$ )

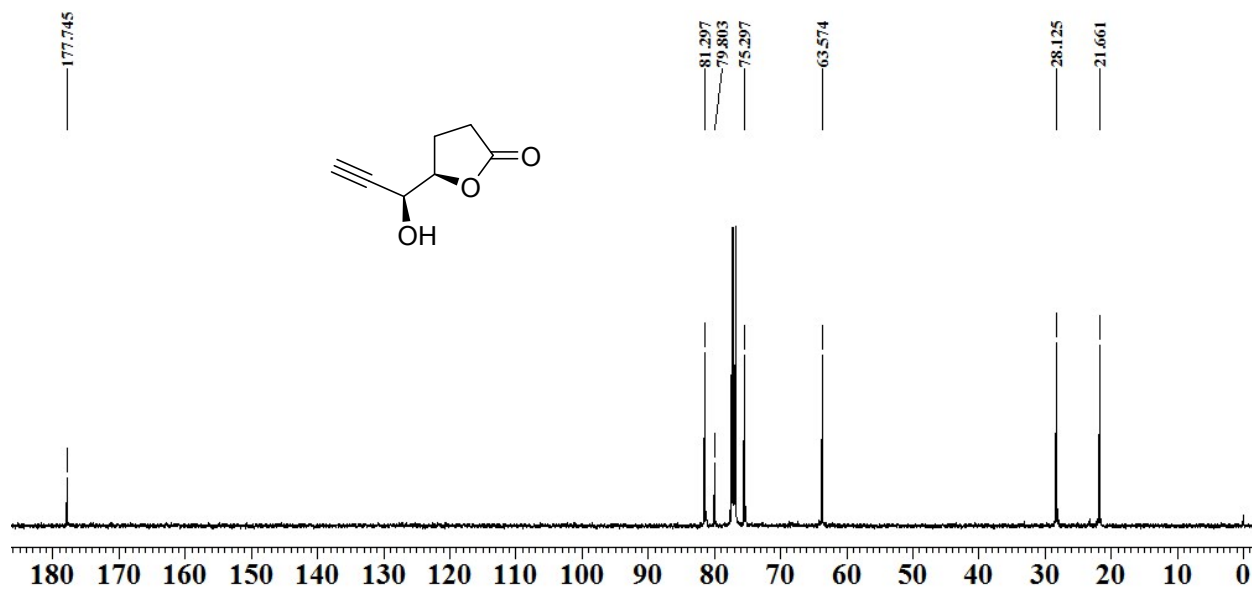

$^{13}\text{C}$  NMR SPECTRUM (125 MHz,  $\text{CDCl}_3$ )

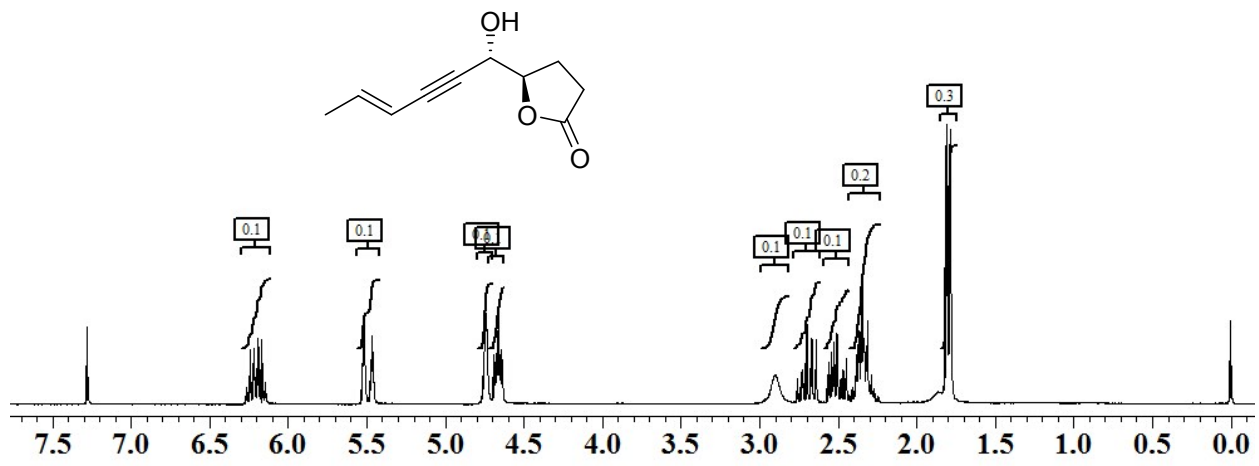

<sup>1</sup>H NMR SPECTRUM (300 MHz, CDCl<sub>3</sub>)

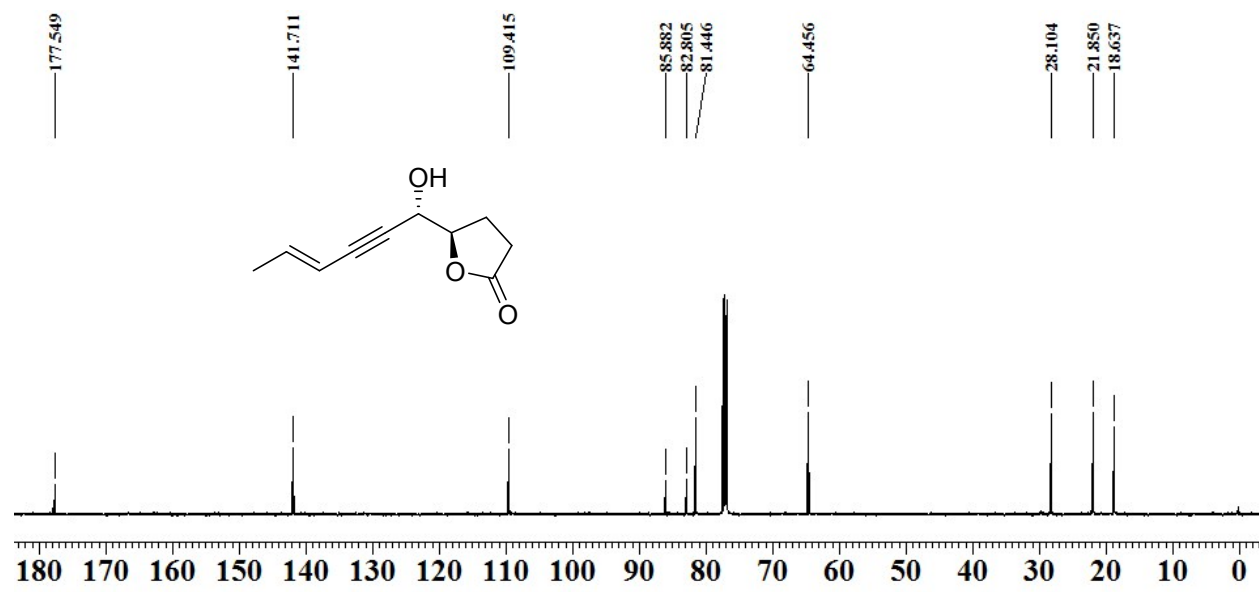

<sup>13</sup>C NMR SPECTRUM (125 MHz, CDCl<sub>3</sub>)

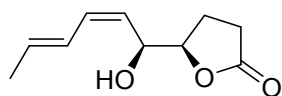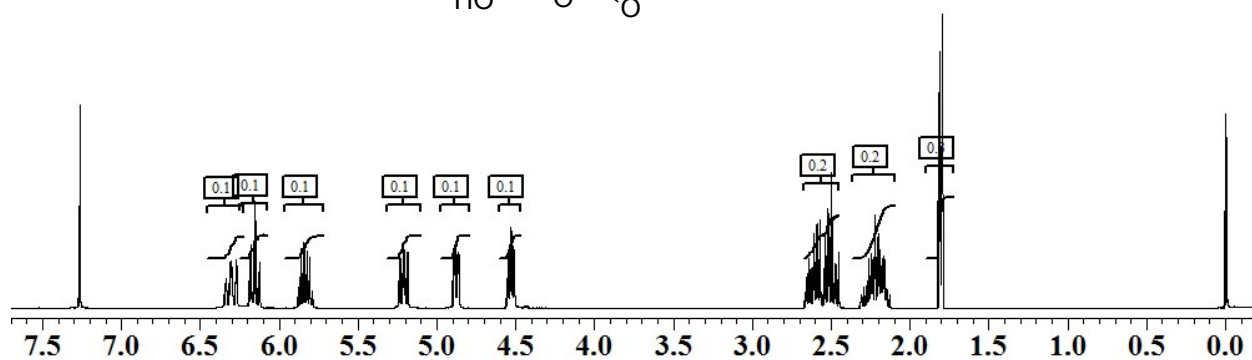

$^1\text{H}$  NMR SPECTRUM (400 MHz,  $\text{CDCl}_3$ )

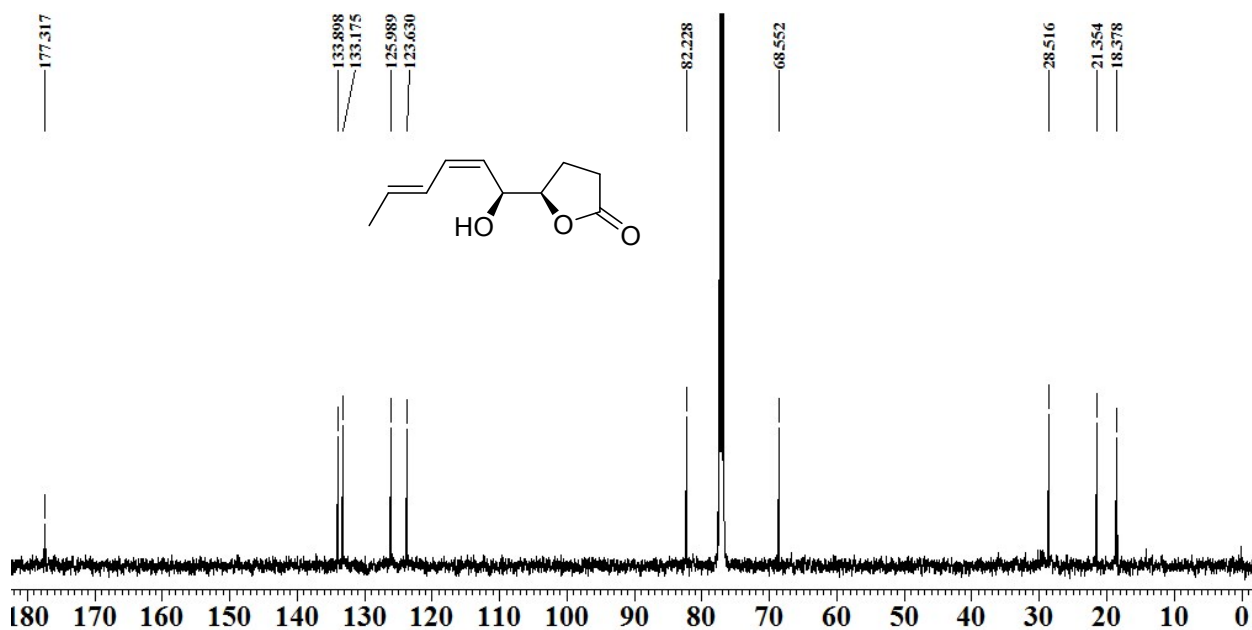

$^{13}\text{C}$  NMR SPECTRUM (125 MHz,  $\text{CDCl}_3$ )

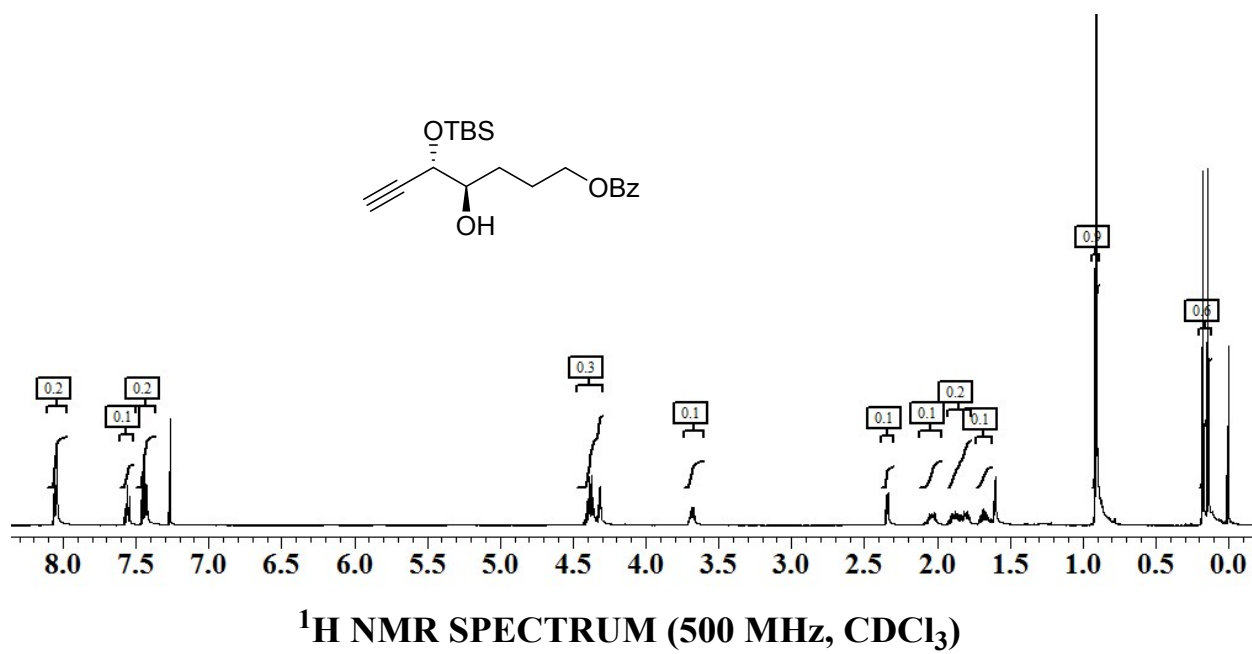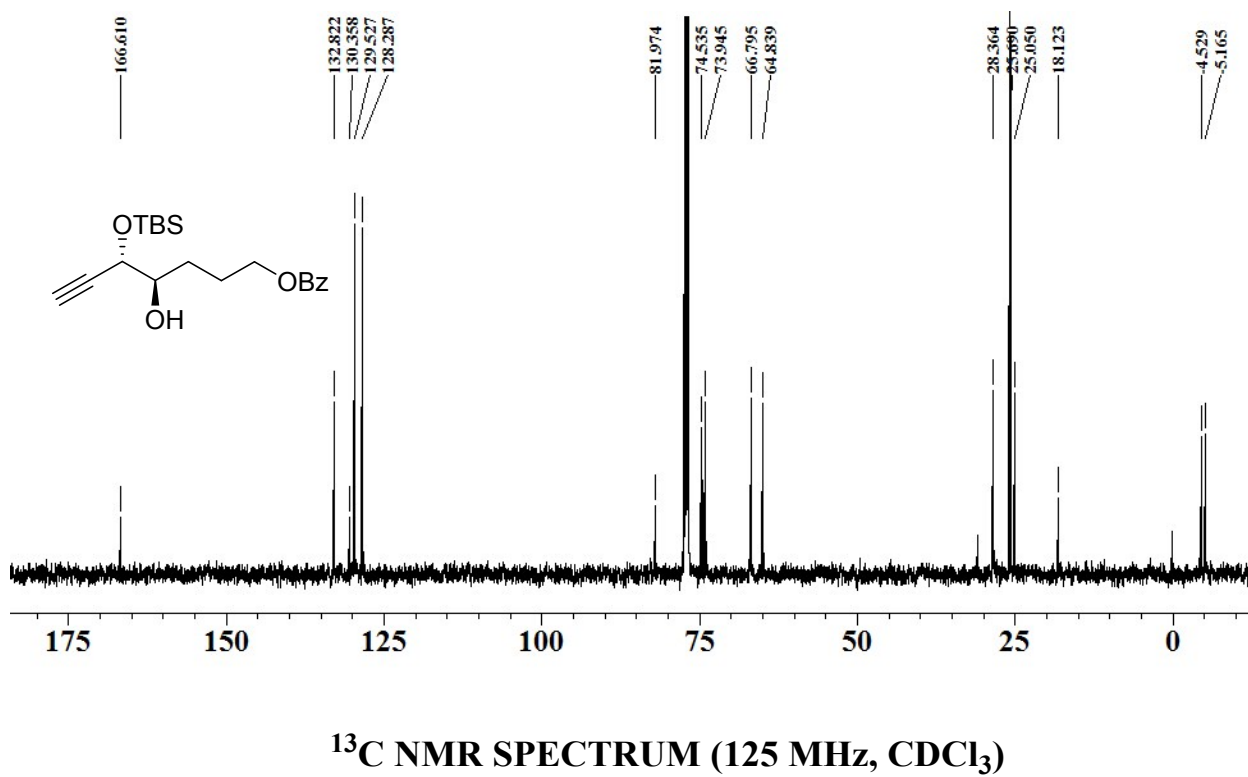

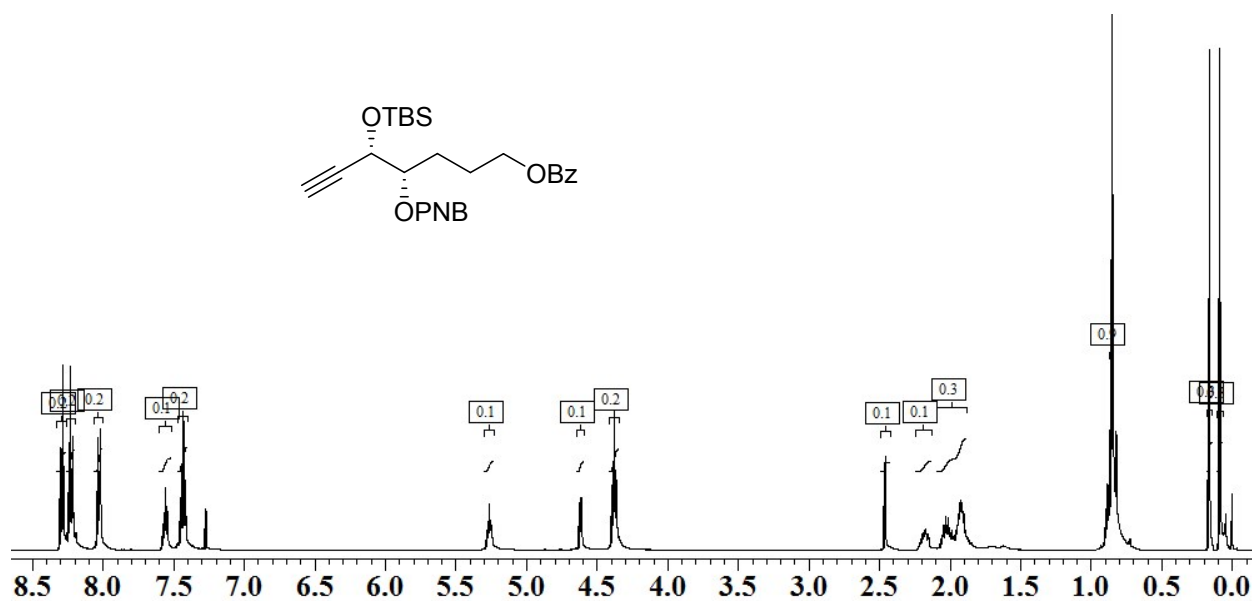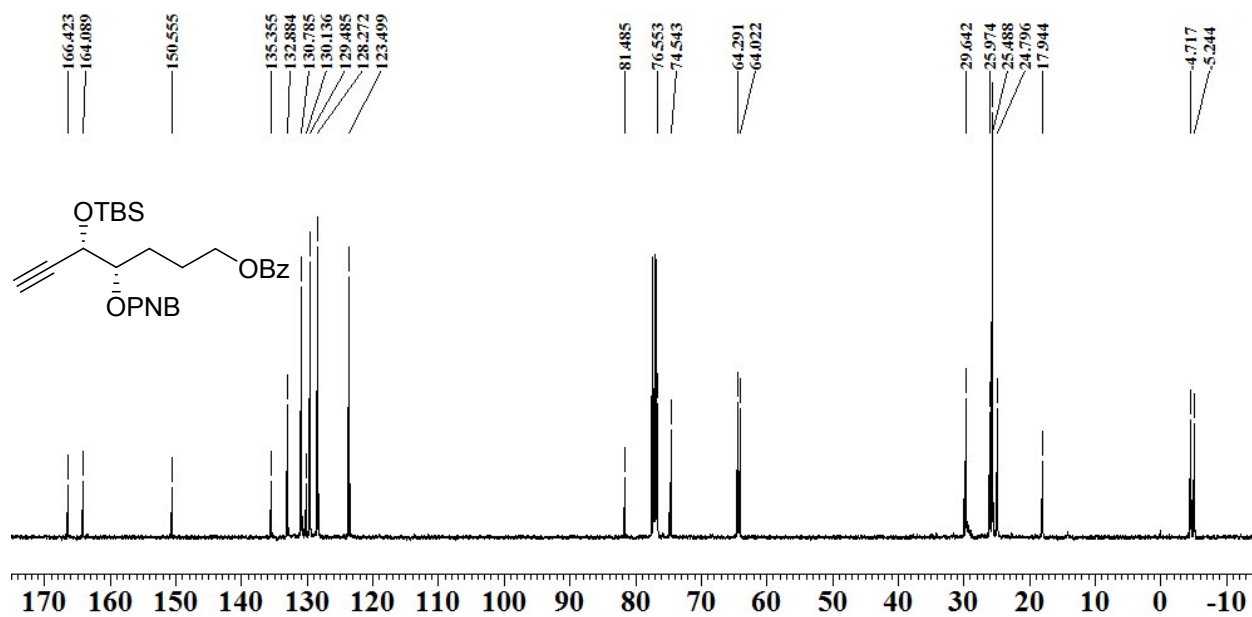



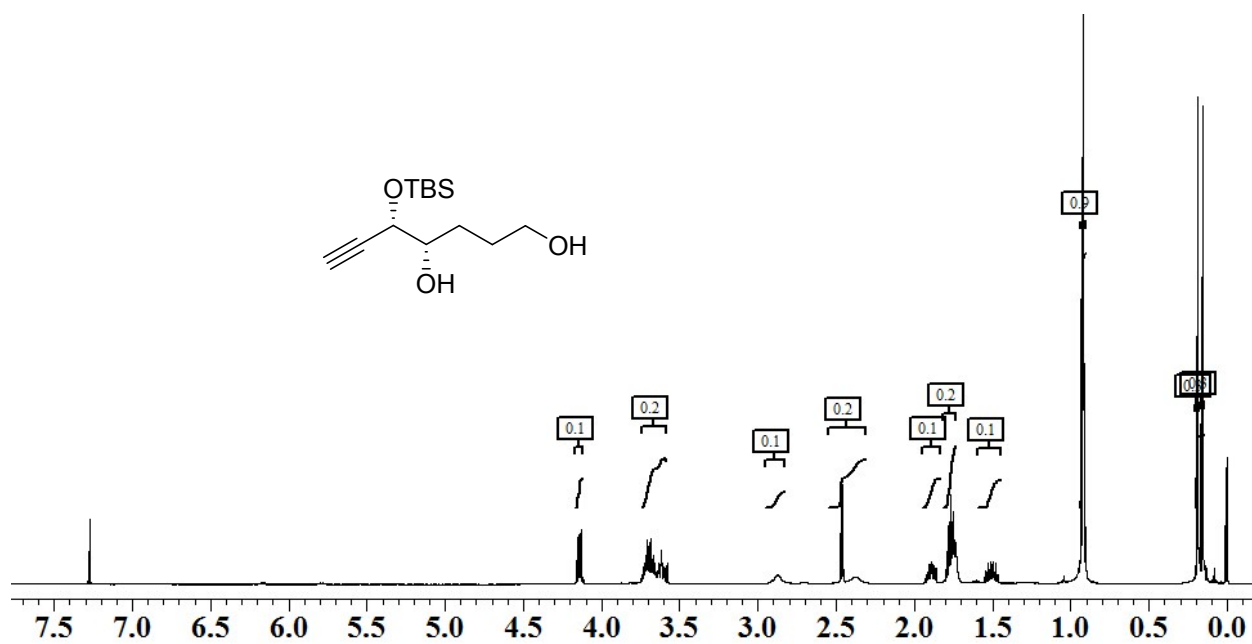

<sup>1</sup>H NMR SPECTRUM (500 MHz, CDCl<sub>3</sub>)

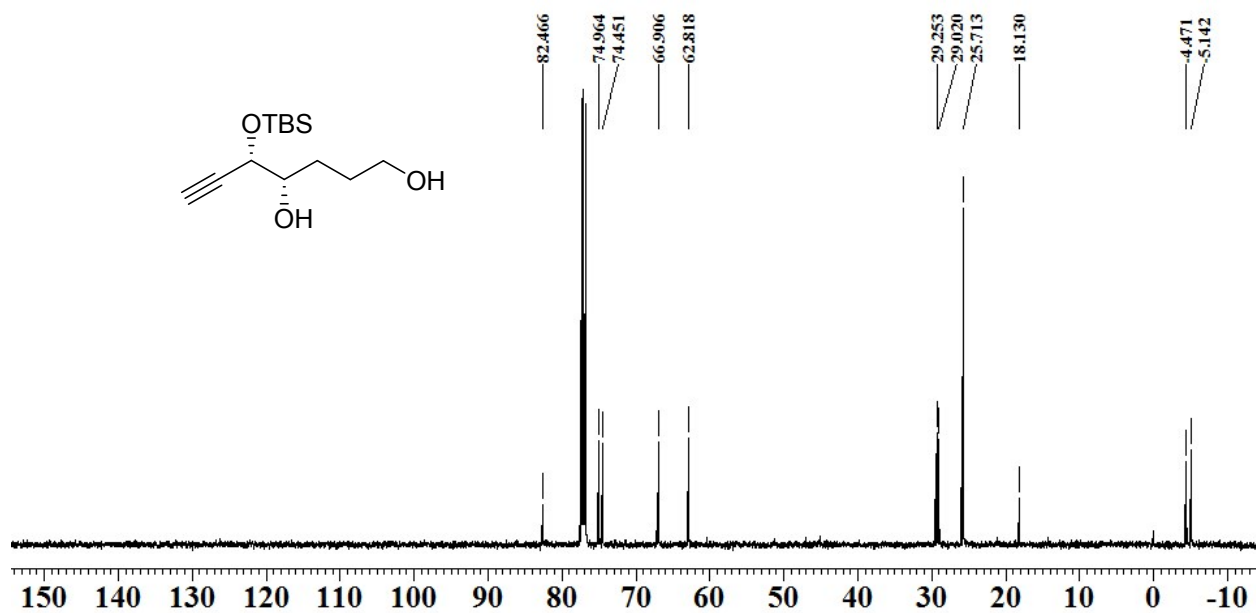

<sup>13</sup>C NMR SPECTRUM (125 MHz, CDCl<sub>3</sub>)

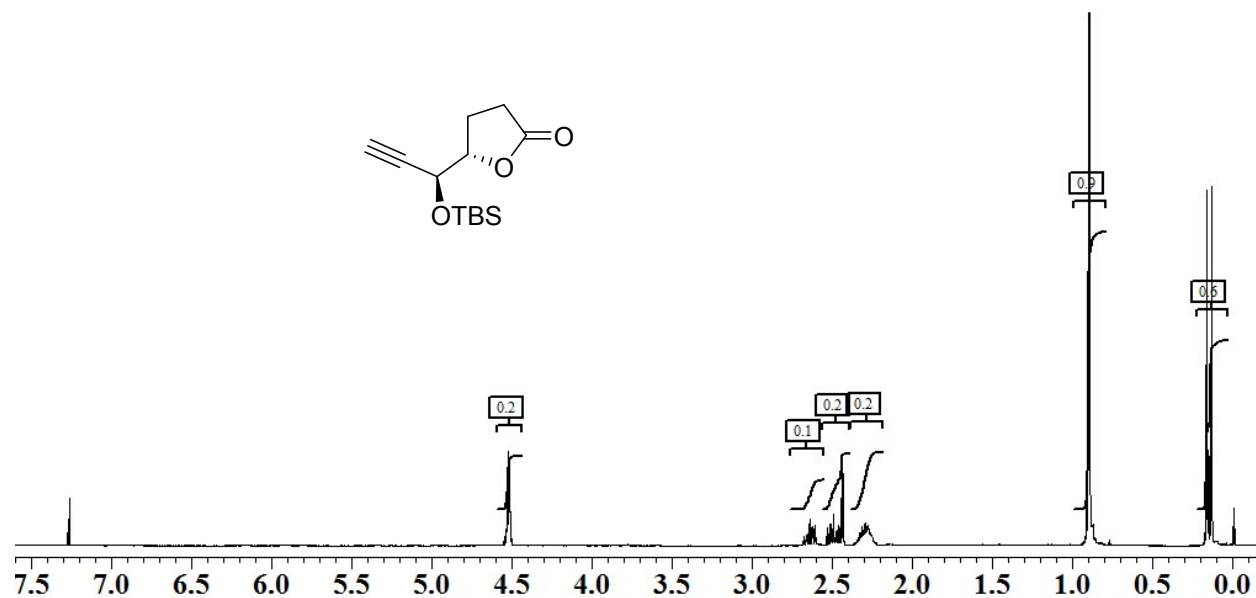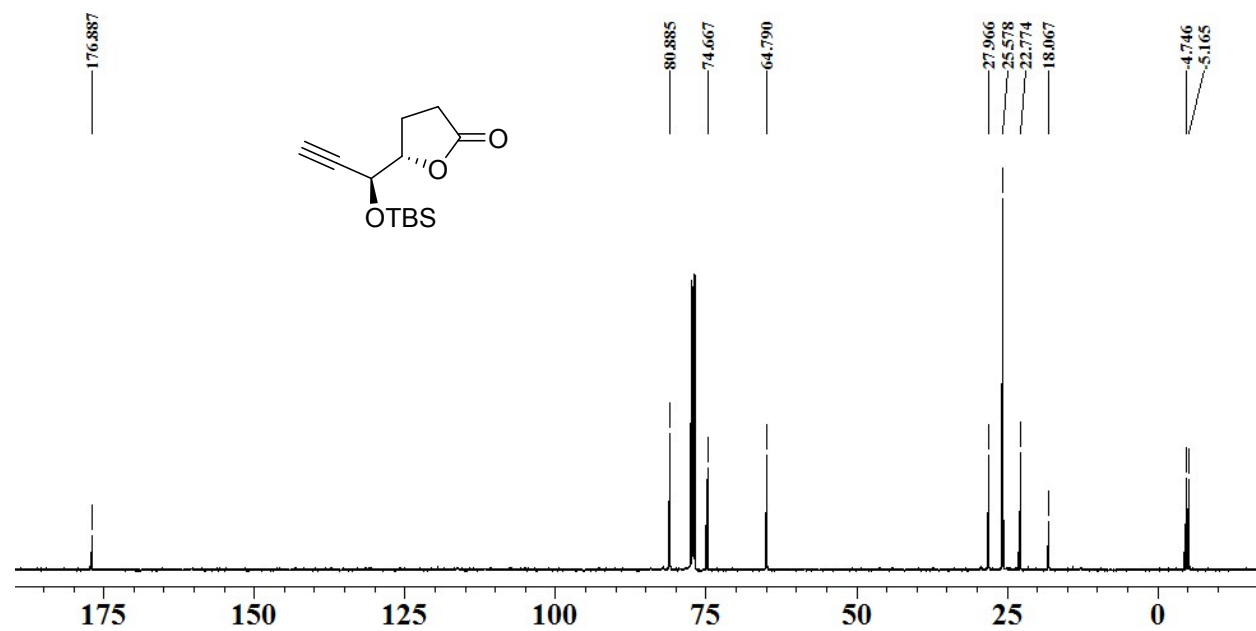

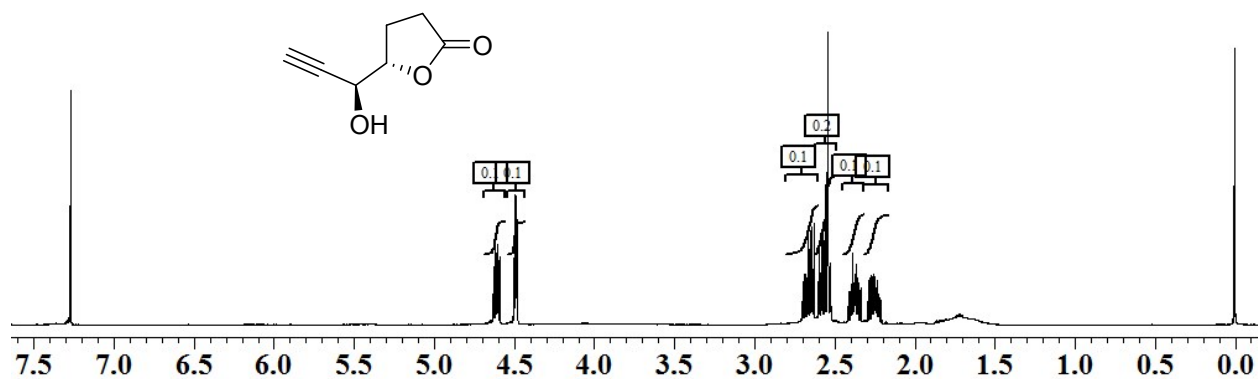

$^1\text{H}$  NMR SPECTRUM (500 MHz,  $\text{CDCl}_3$ )

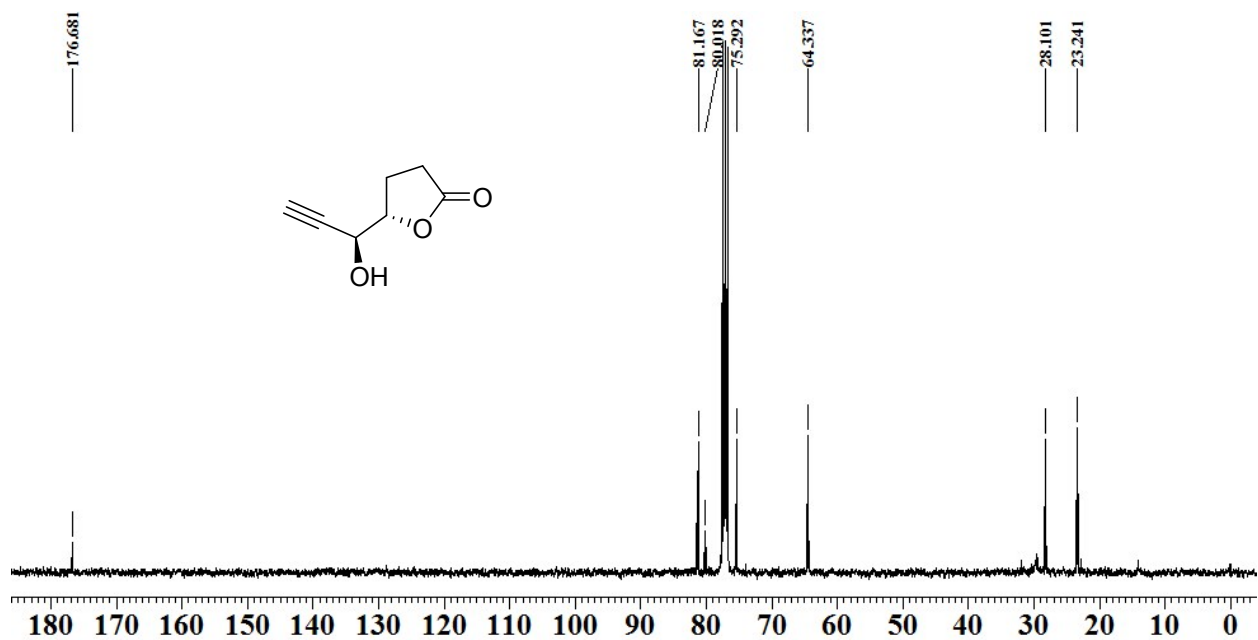

$^{13}\text{C}$  NMR SPECTRUM (100 MHz,  $\text{CDCl}_3$ )

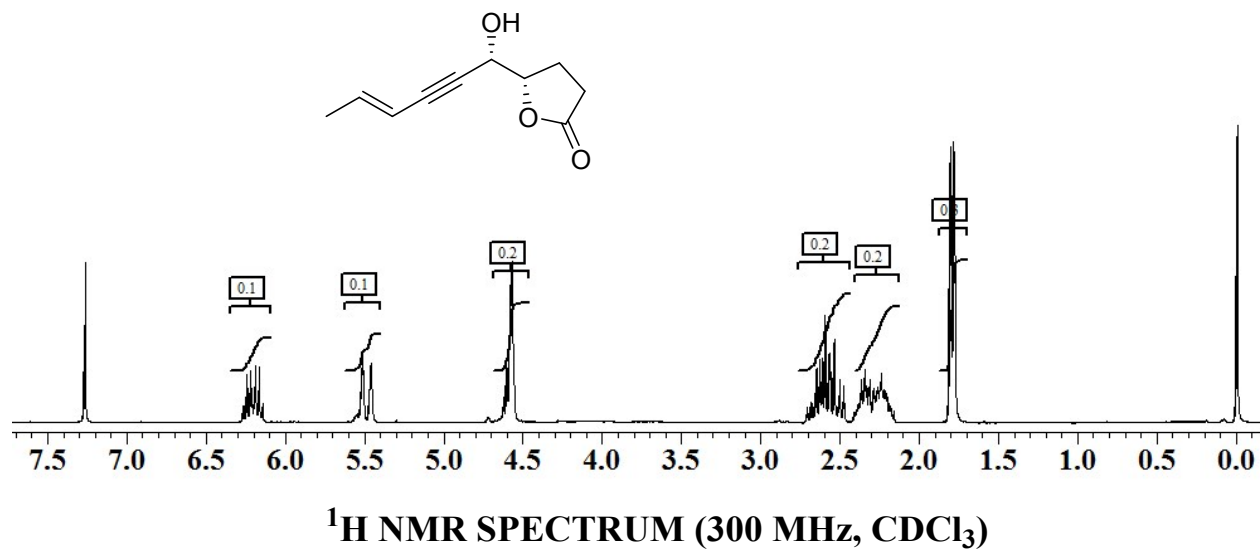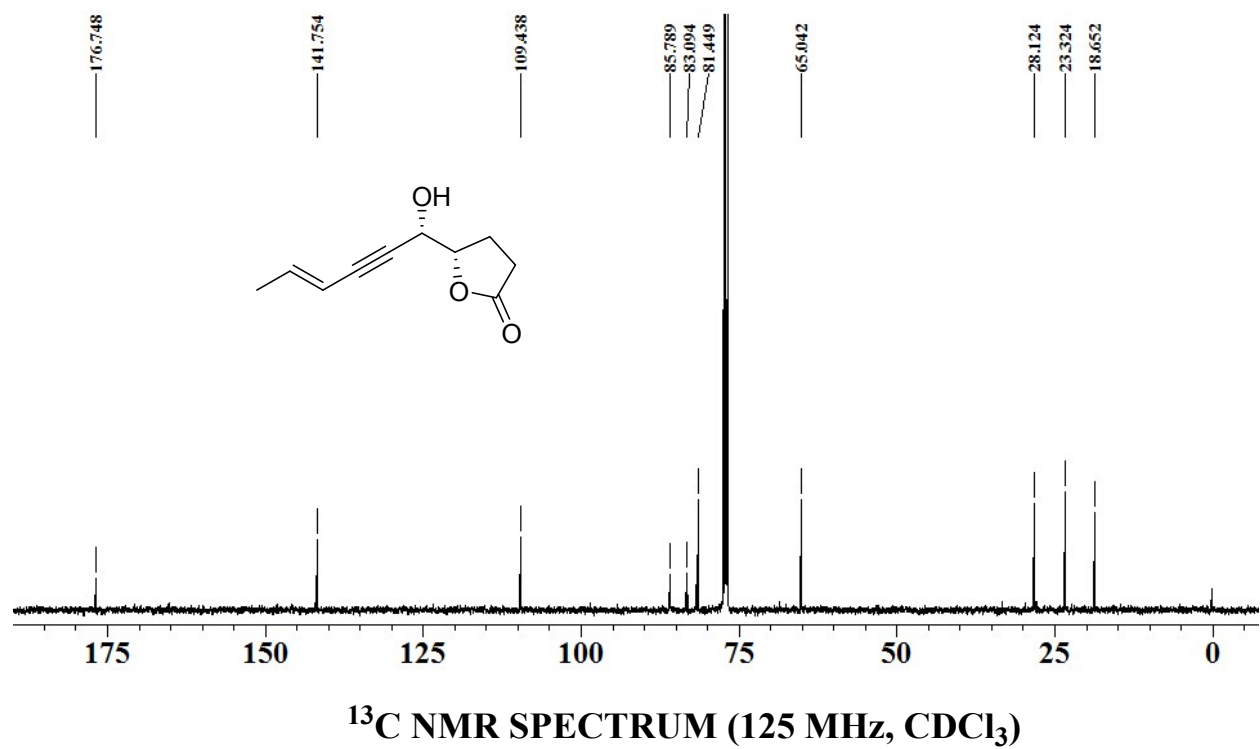

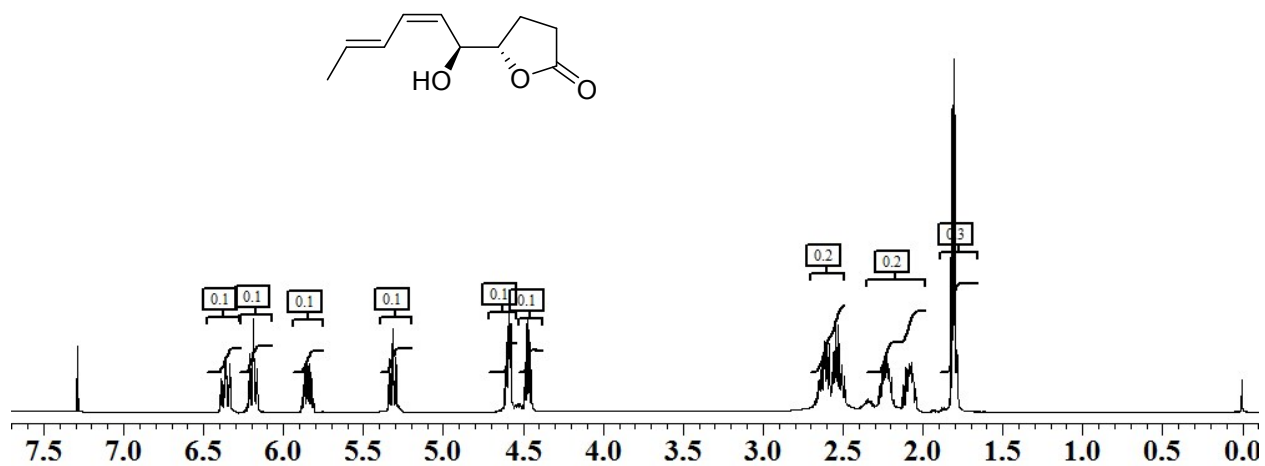

<sup>1</sup>H NMR SPECTRUM (500 MHz, CDCl<sub>3</sub>)

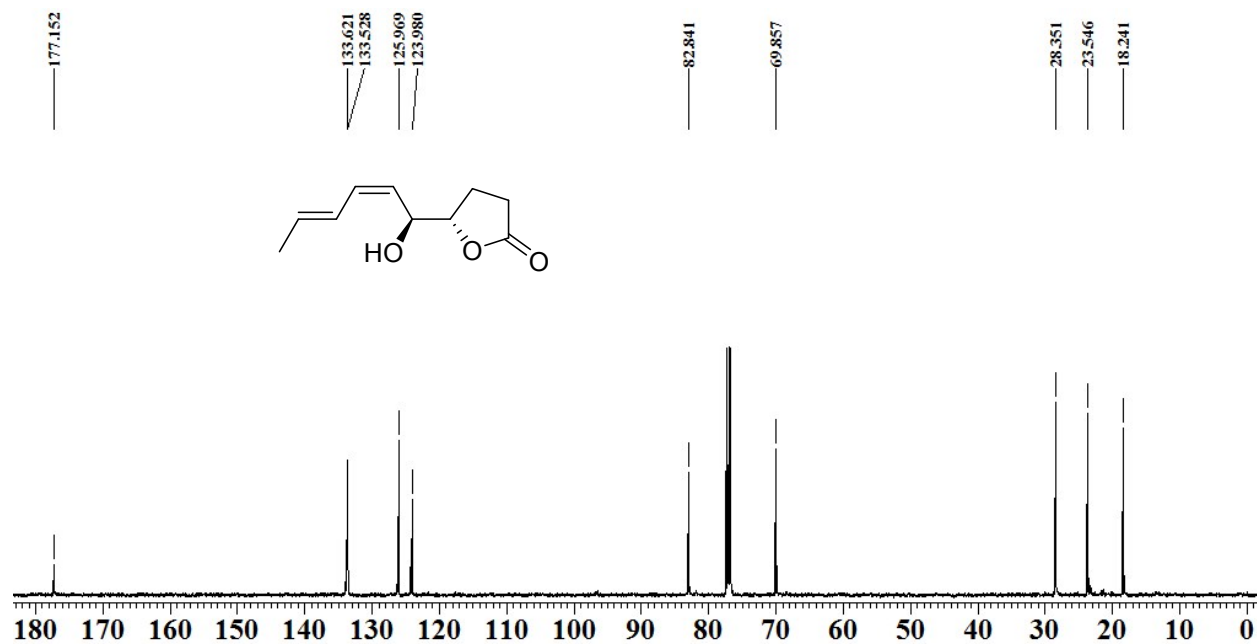

<sup>13</sup>C NMR SPECTRUM (125 MHz, CDCl<sub>3</sub>)

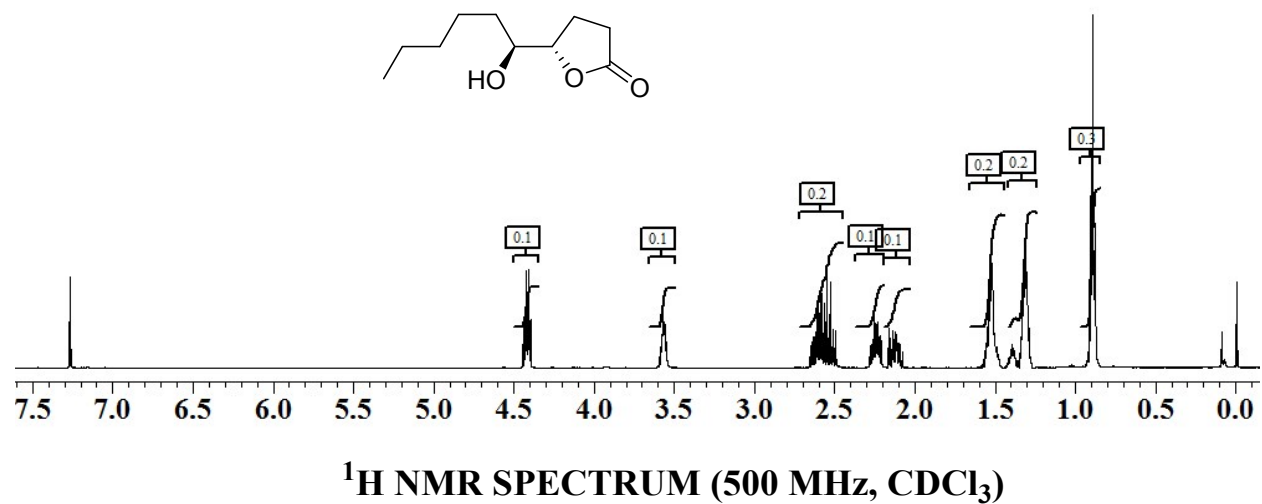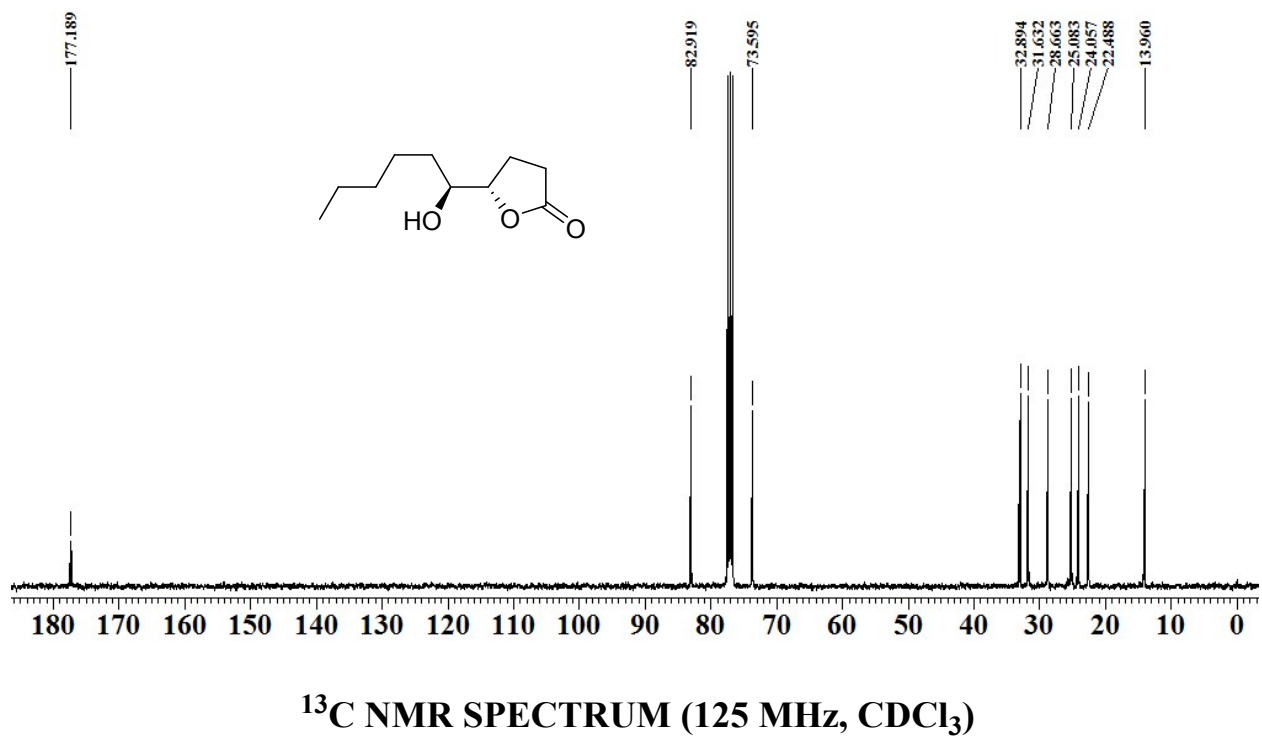

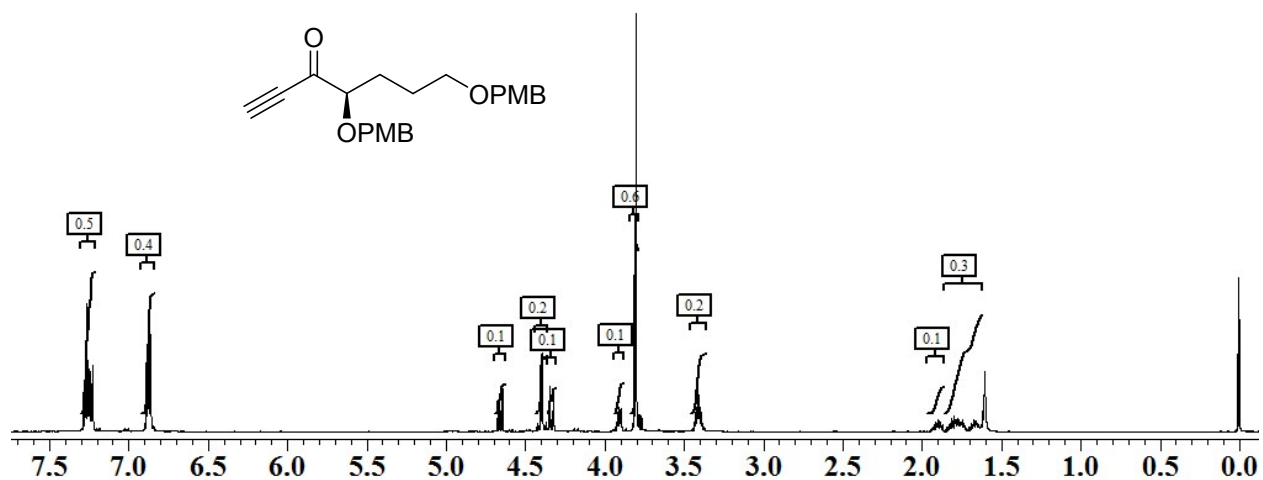

$^1\text{H}$  NMR SPECTRUM (500 MHz,  $\text{CDCl}_3$ )

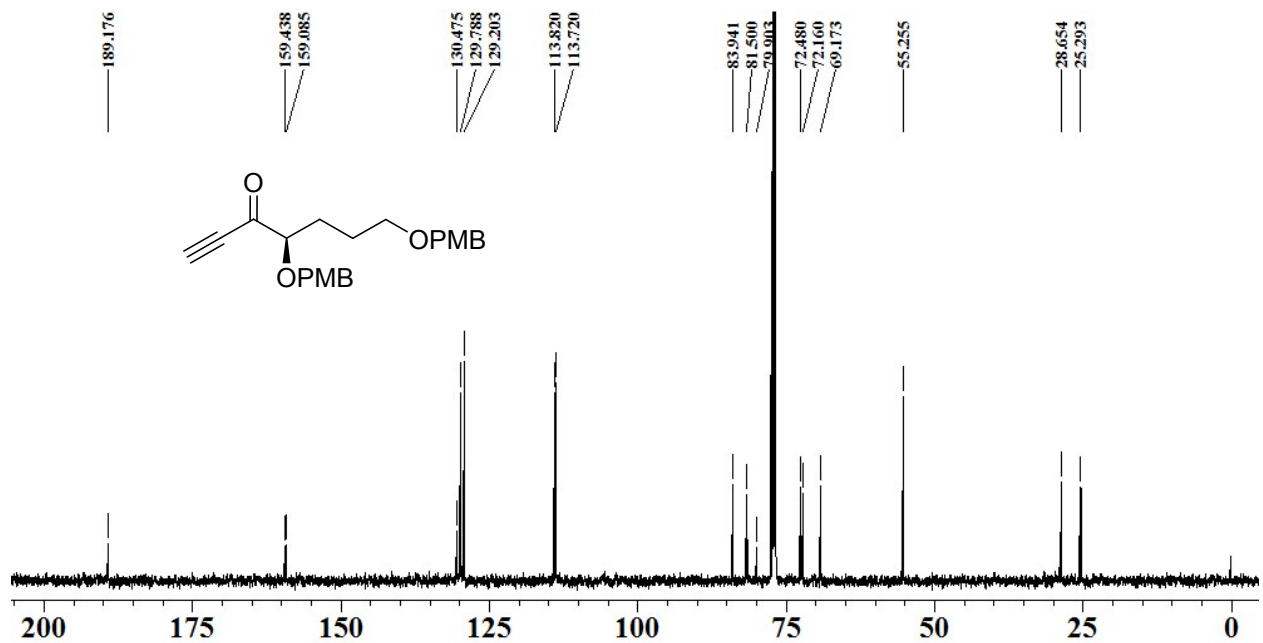

$^{13}\text{C}$  NMR SPECTRUM (125 MHz,  $\text{CDCl}_3$ )

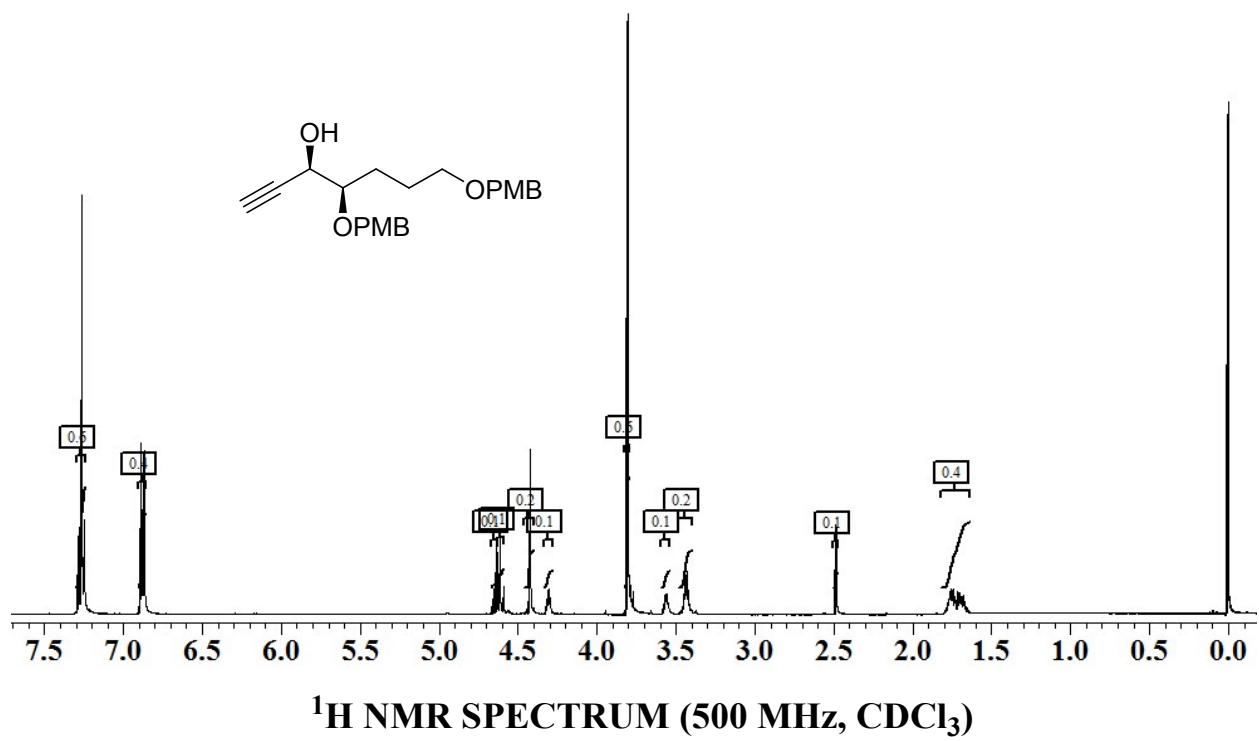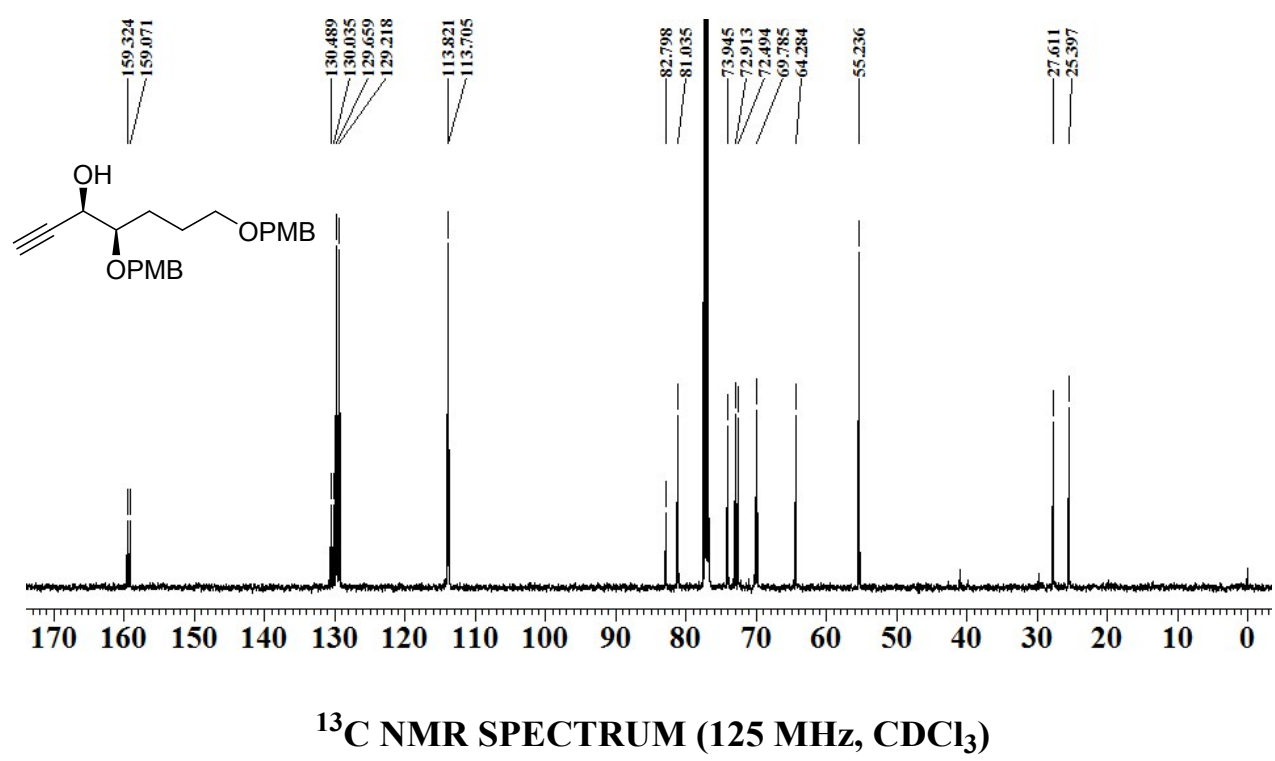



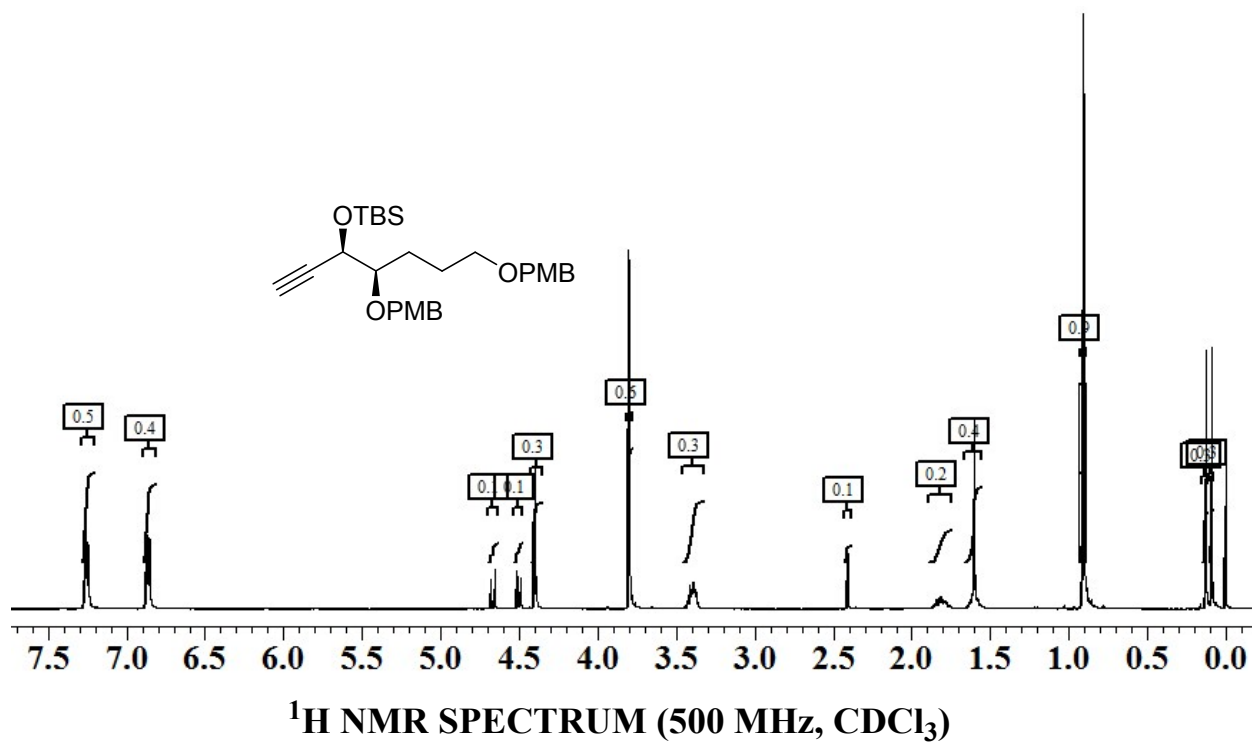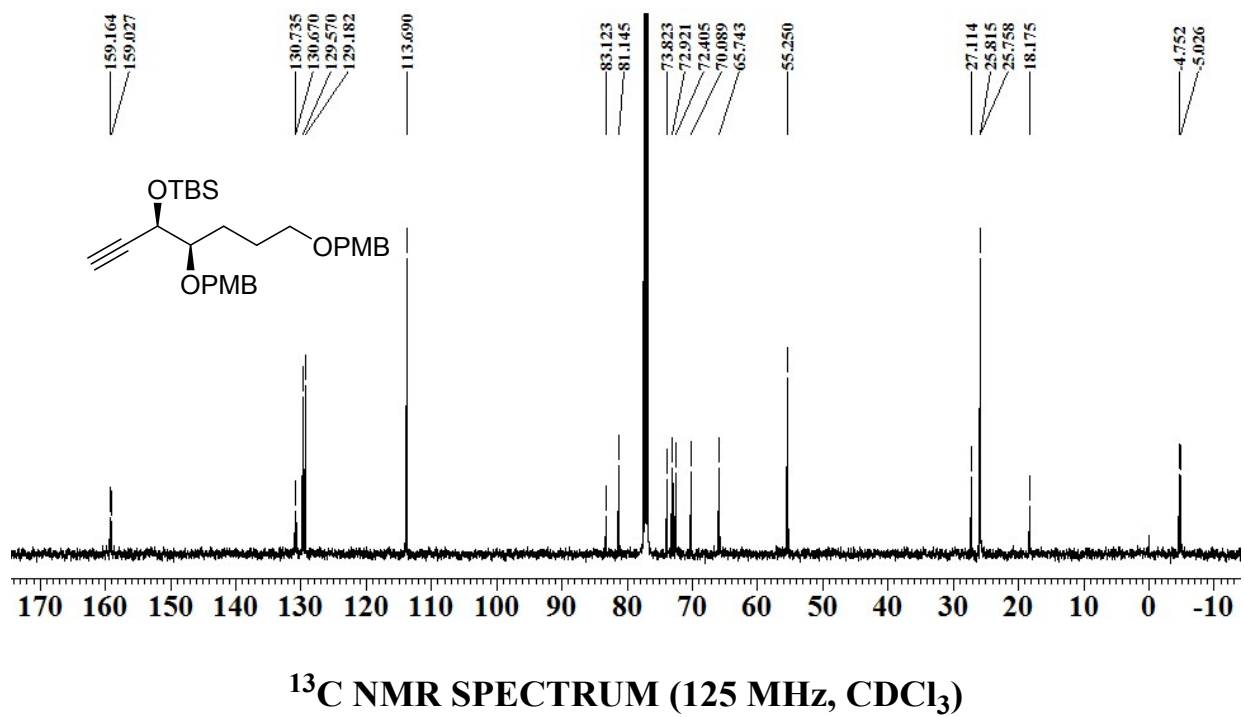

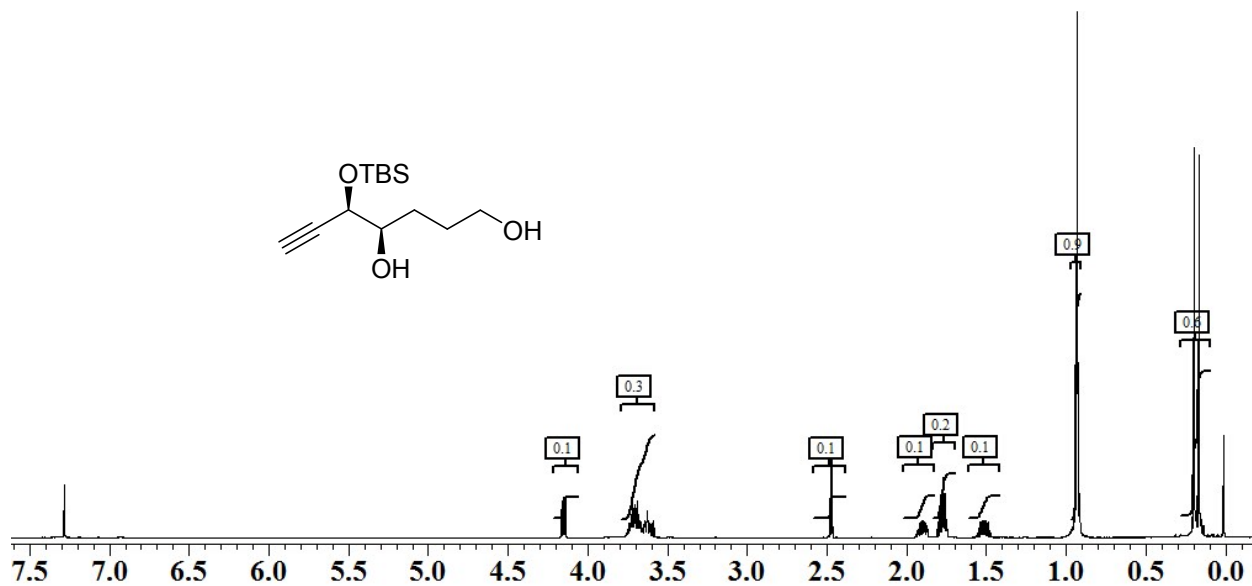

$^1\text{H}$  NMR SPECTRUM (400 MHz,  $\text{CDCl}_3$ )

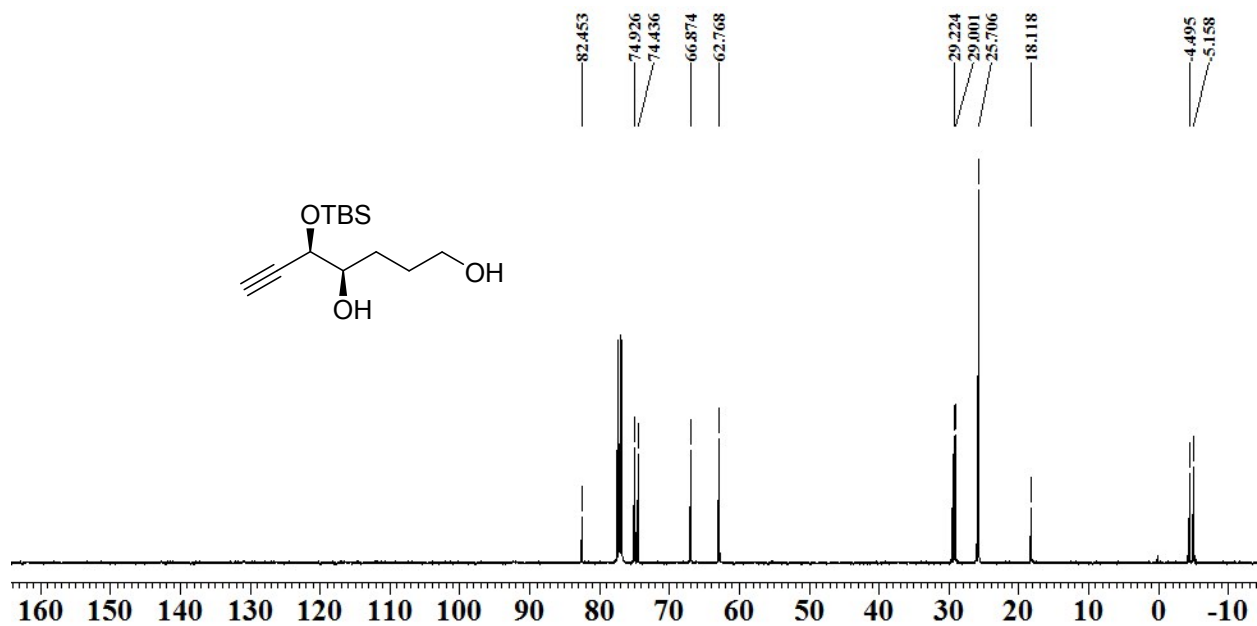

$^{13}\text{C}$  NMR SPECTRUM (125 MHz,  $\text{CDCl}_3$ )

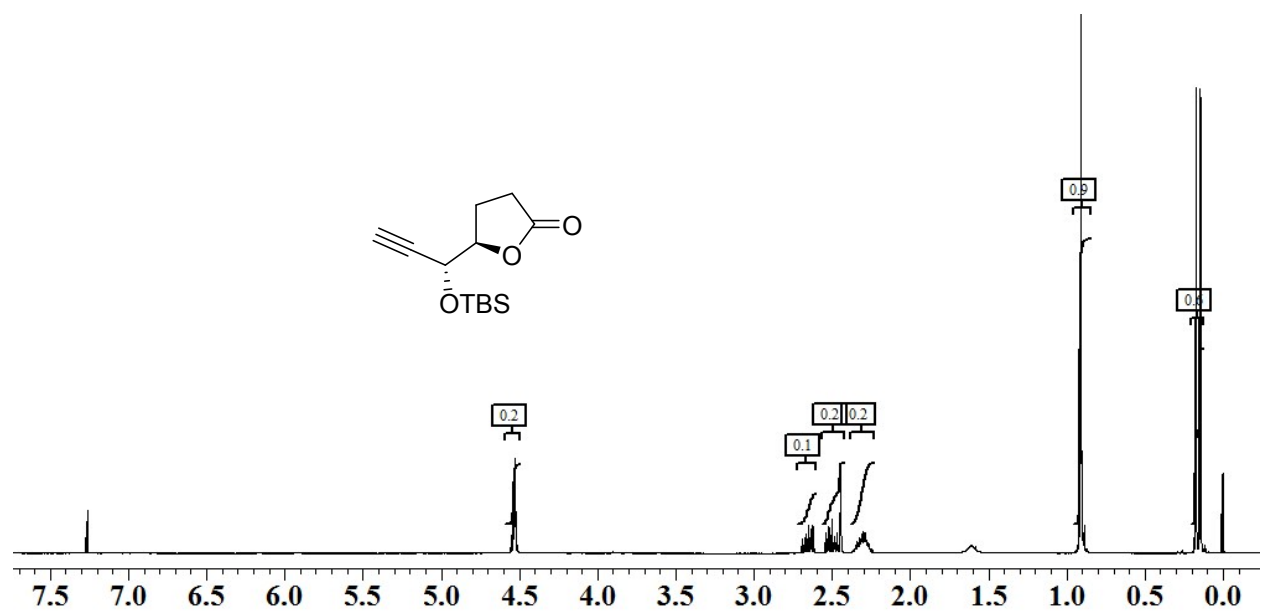

<sup>1</sup>H NMR SPECTRUM (500 MHz, CDCl<sub>3</sub>)

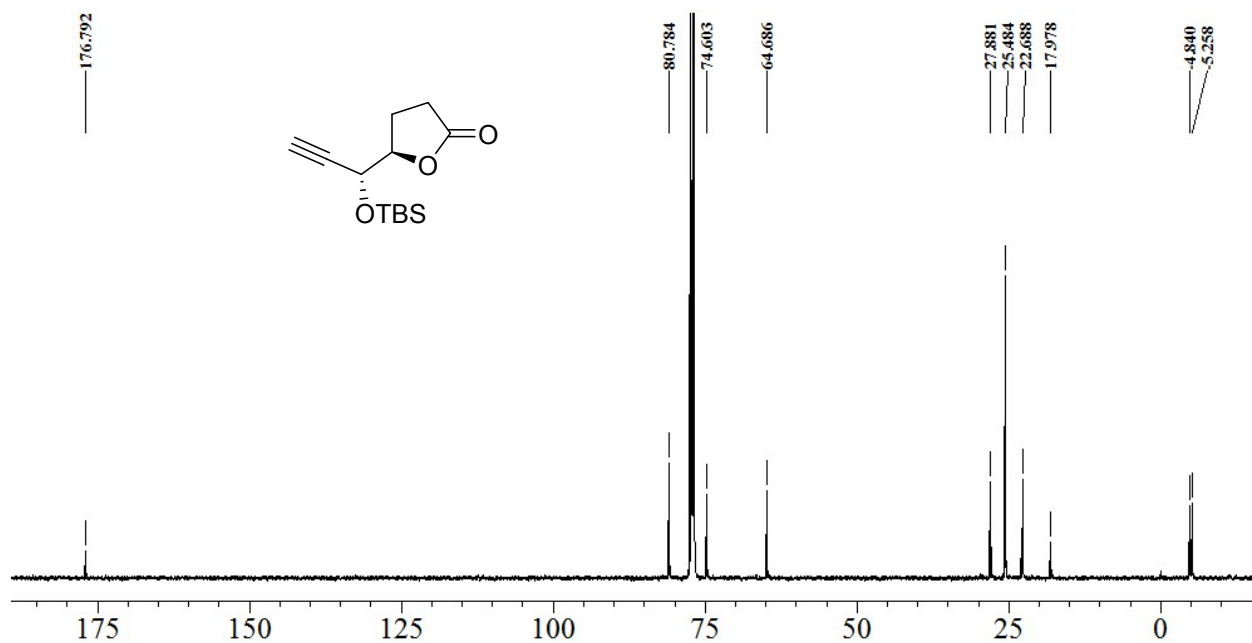

<sup>13</sup>C NMR SPECTRUM (125 MHz, CDCl<sub>3</sub>)

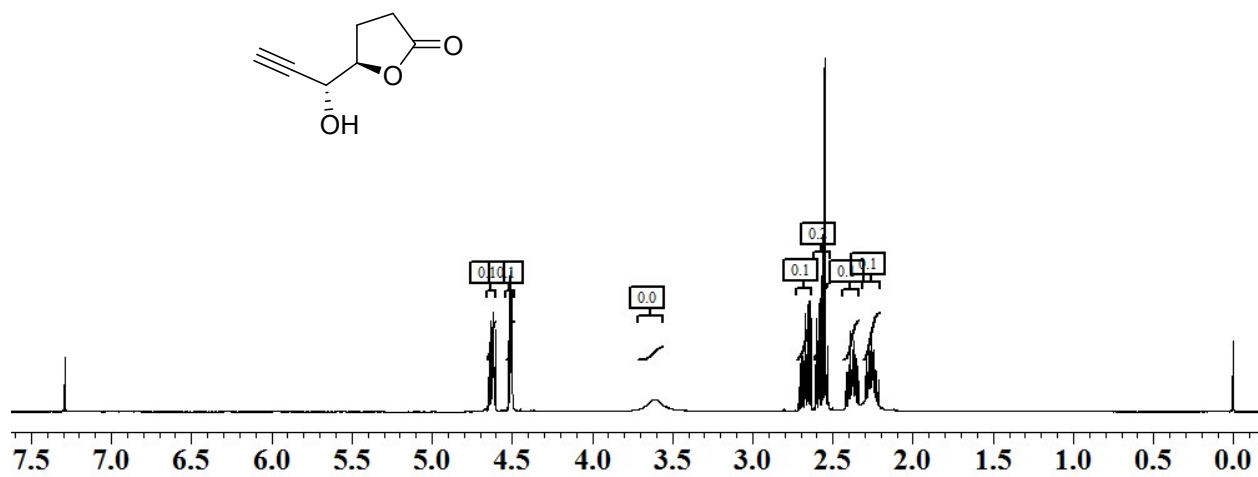

$^1\text{H}$  NMR SPECTRUM (500 MHz,  $\text{CDCl}_3$ )

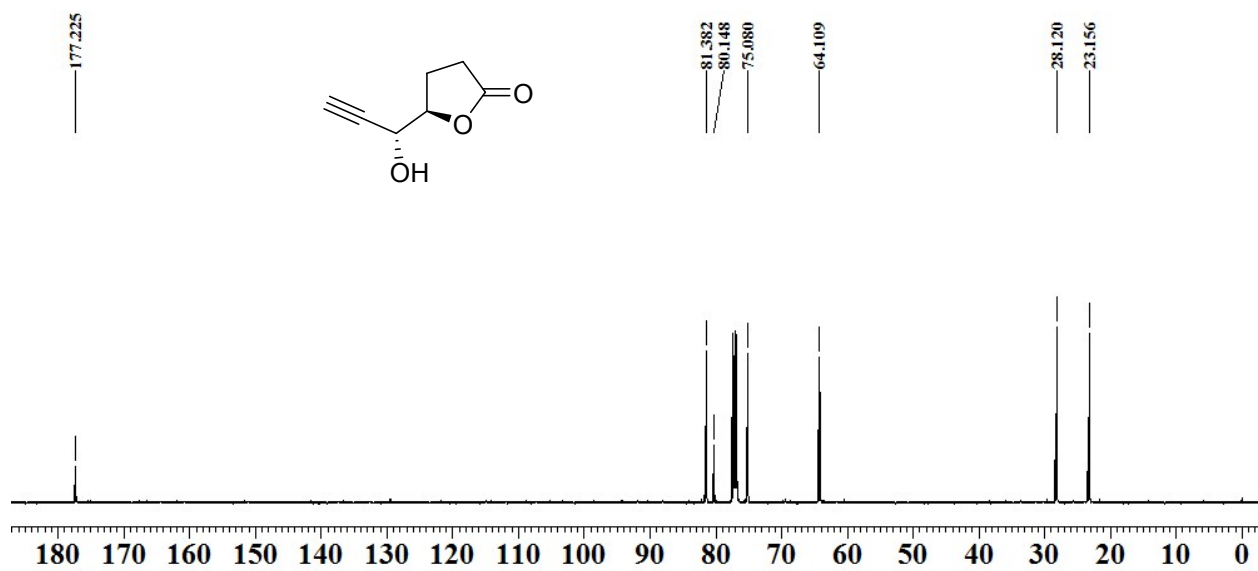

$^{13}\text{C}$  NMR SPECTRUM (125 MHz,  $\text{CDCl}_3$ )

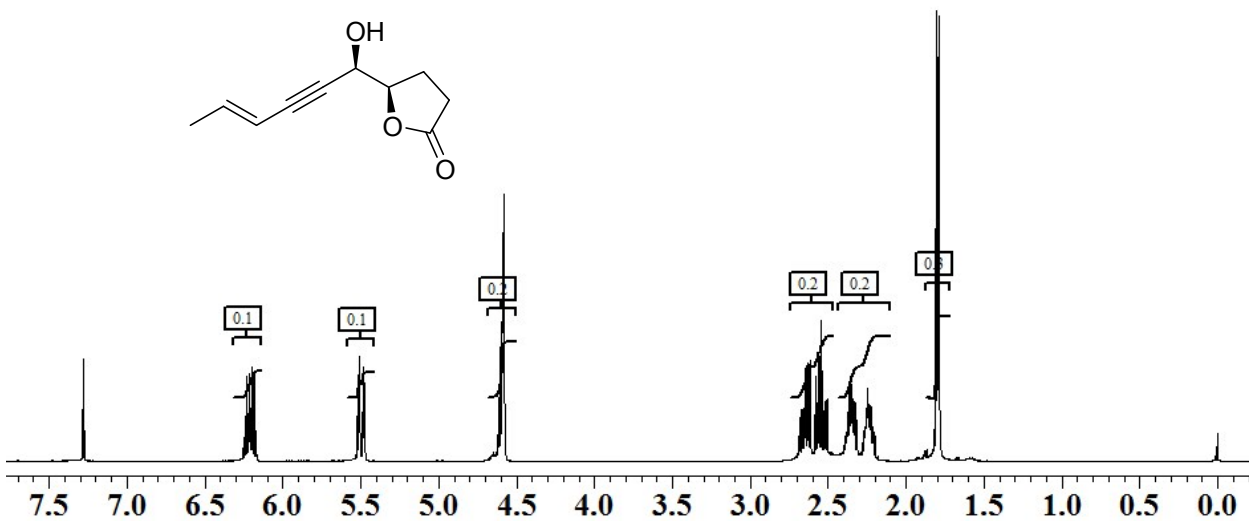

<sup>1</sup>H NMR SPECTRUM (500 MHz, CDCl<sub>3</sub>)

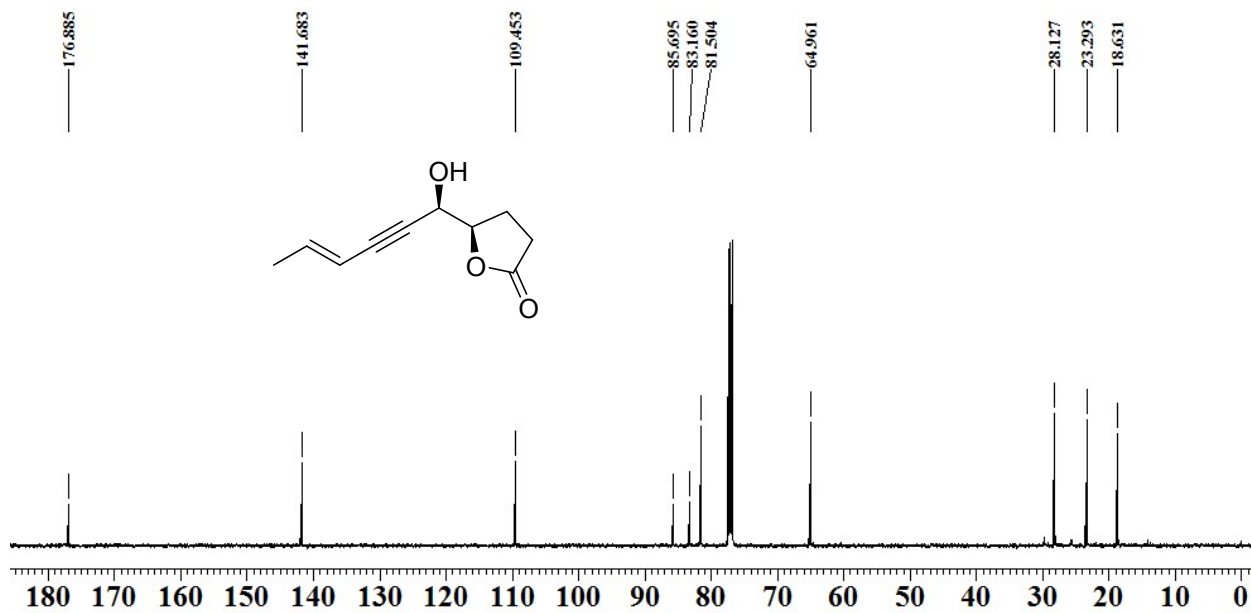

<sup>13</sup>C NMR SPECTRUM (125 MHz, CDCl<sub>3</sub>)

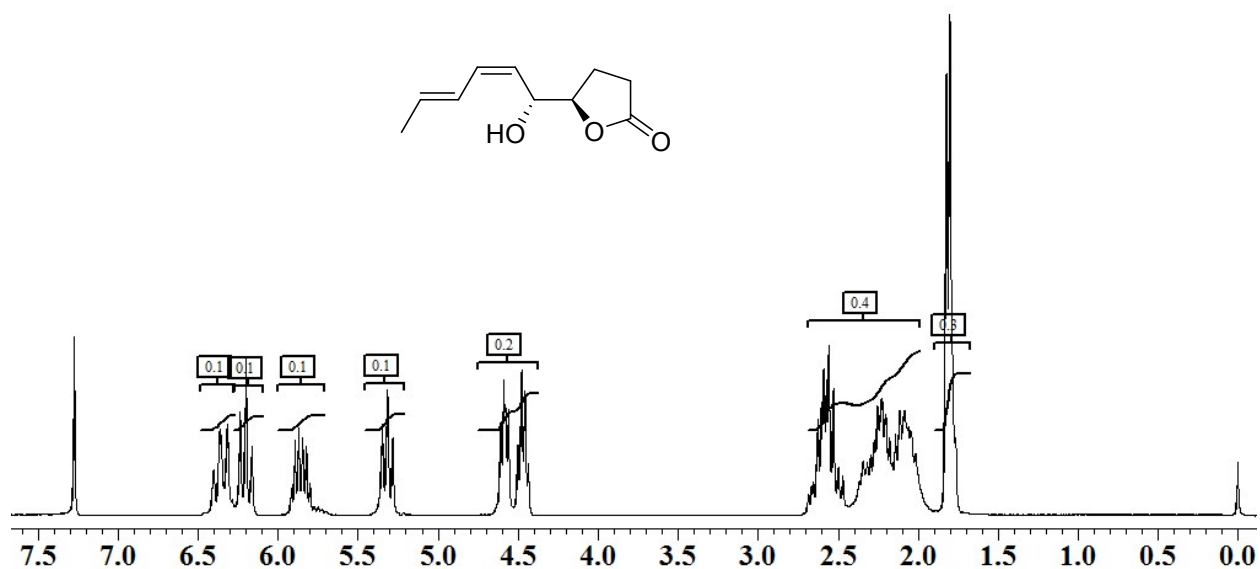

**<sup>1</sup>H NMR SPECTRUM (300 MHz, CDCl<sub>3</sub>)**

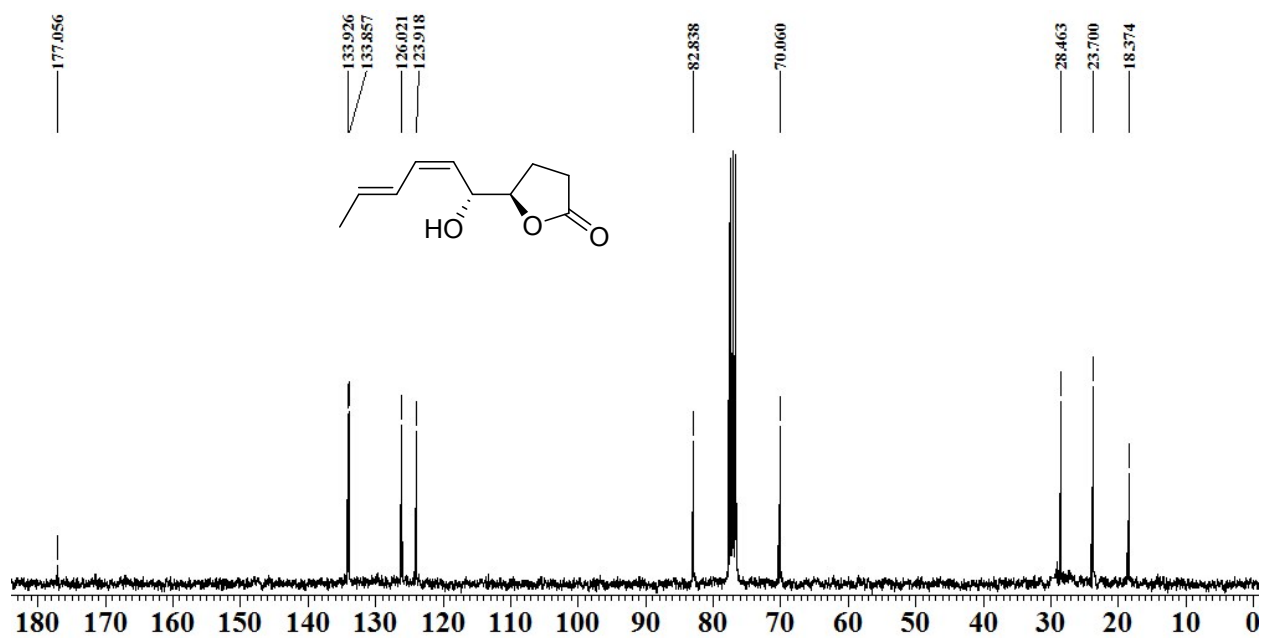

**<sup>13</sup>C NMR SPECTRUM (100 MHz, CDCl<sub>3</sub>)**

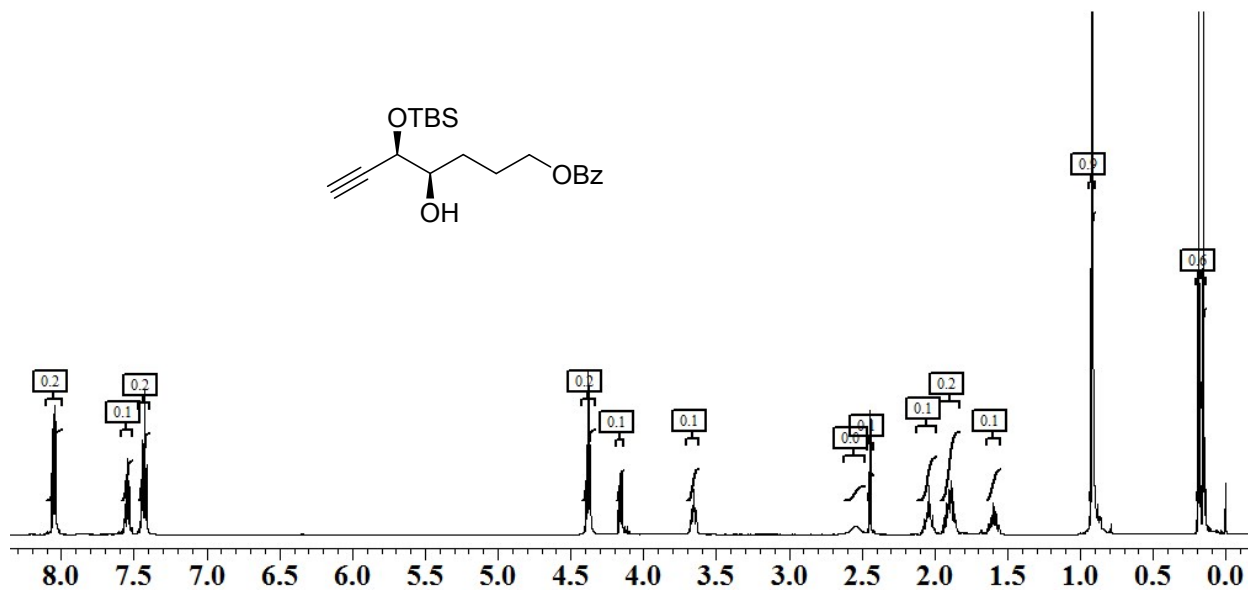

<sup>1</sup>H NMR SPECTRUM (500 MHz, CDCl<sub>3</sub>)

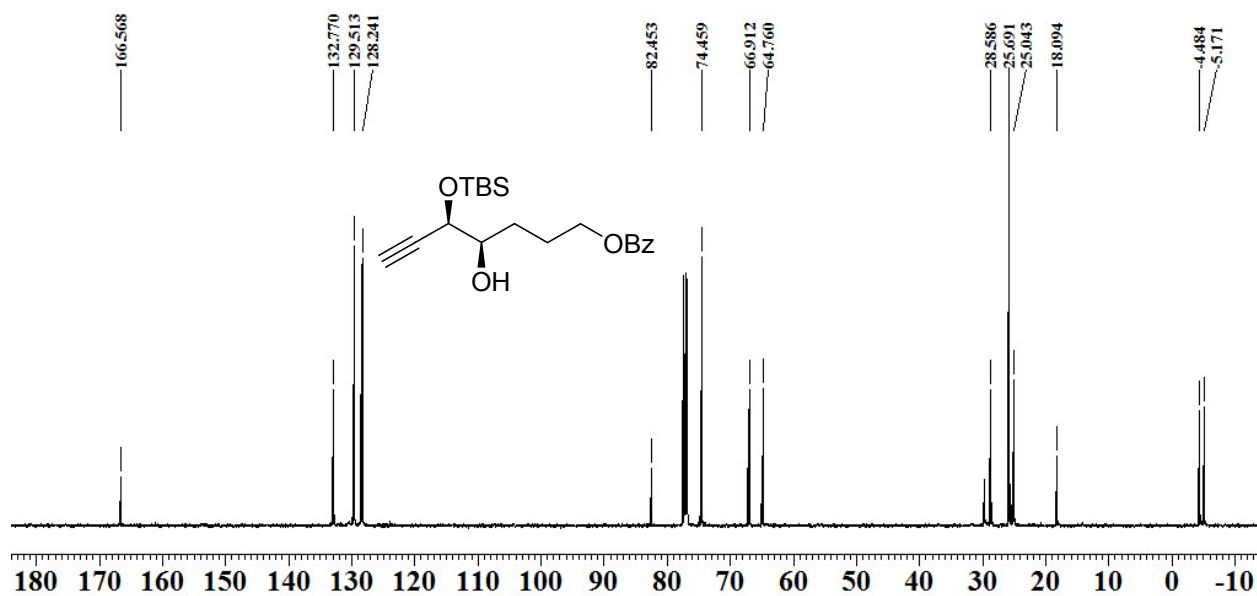

<sup>13</sup>C NMR SPECTRUM (125 MHz, CDCl<sub>3</sub>)

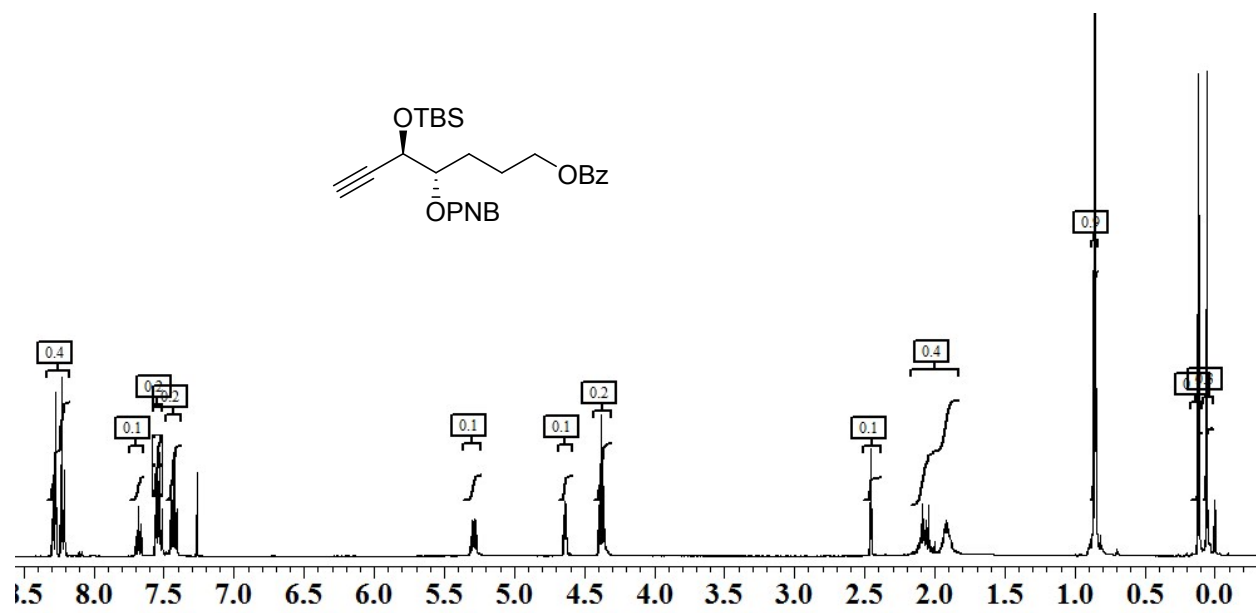

<sup>1</sup>H NMR SPECTRUM (400 MHz, CDCl<sub>3</sub>)

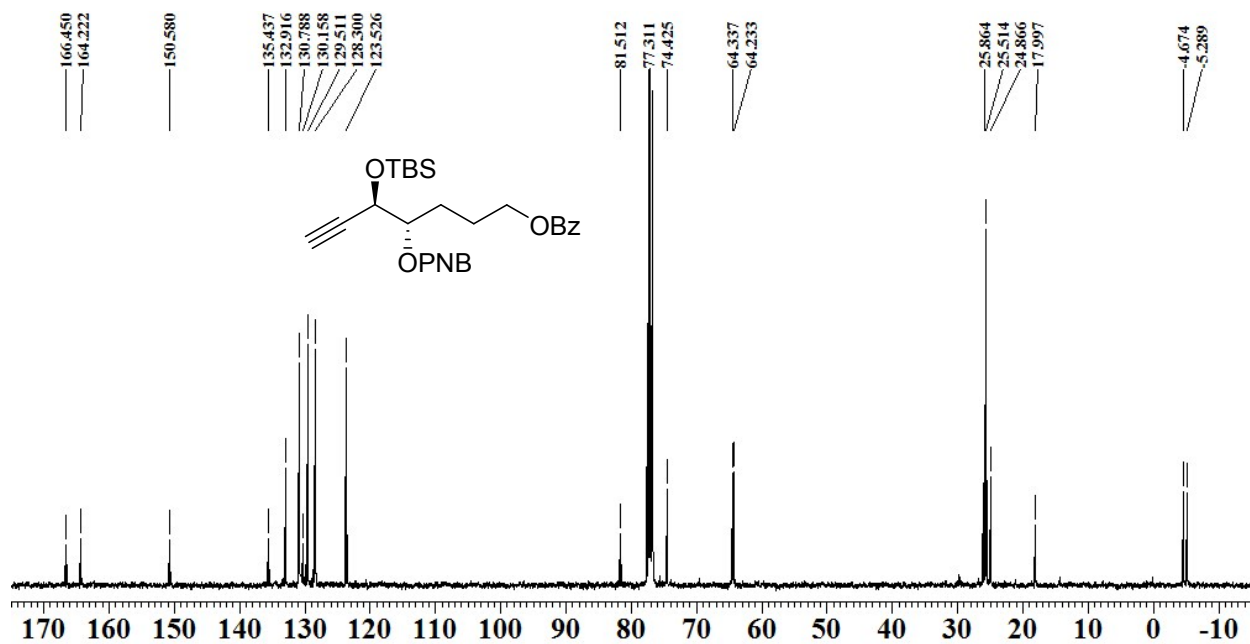

<sup>13</sup>C NMR SPECTRUM (100 MHz, CDCl<sub>3</sub>)



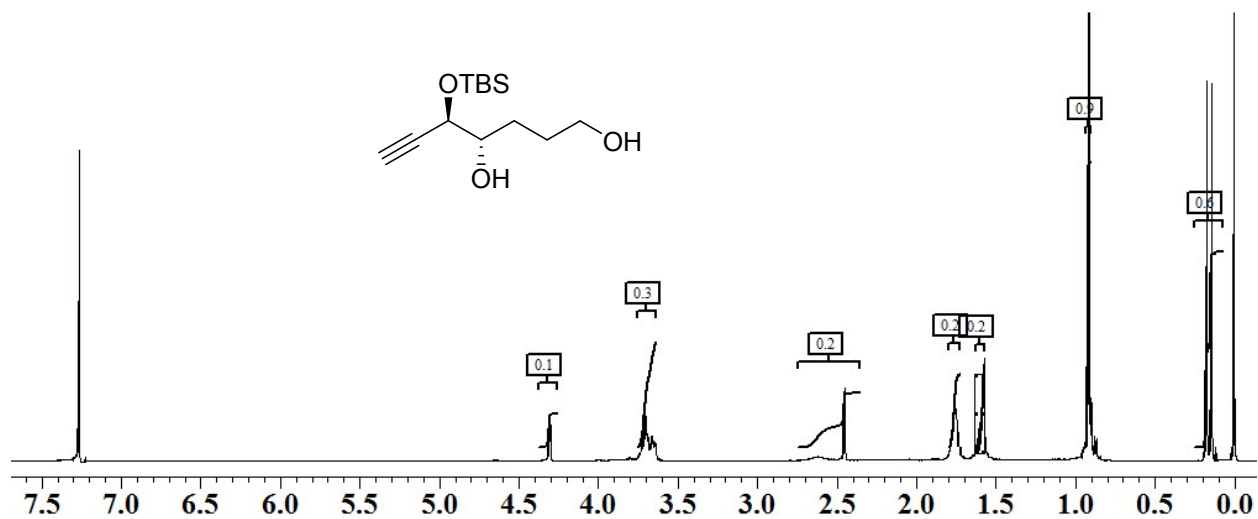

<sup>1</sup>H NMR SPECTRUM (500 MHz, CDCl<sub>3</sub>)

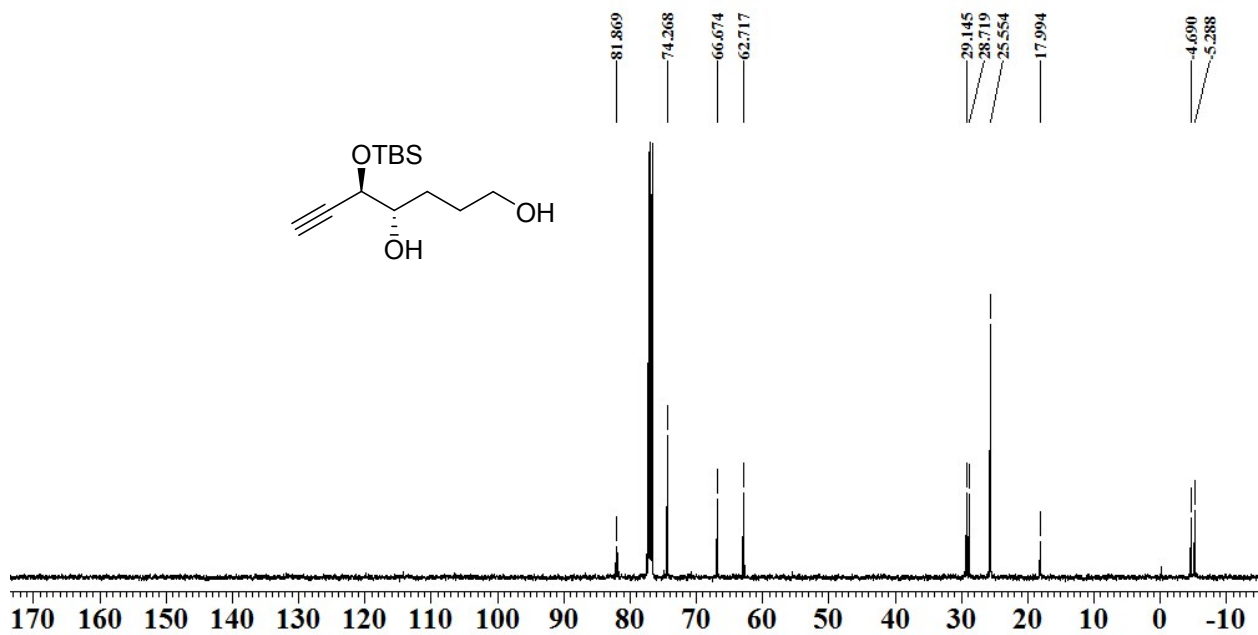

<sup>13</sup>C NMR SPECTRUM (100 MHz, CDCl<sub>3</sub>)

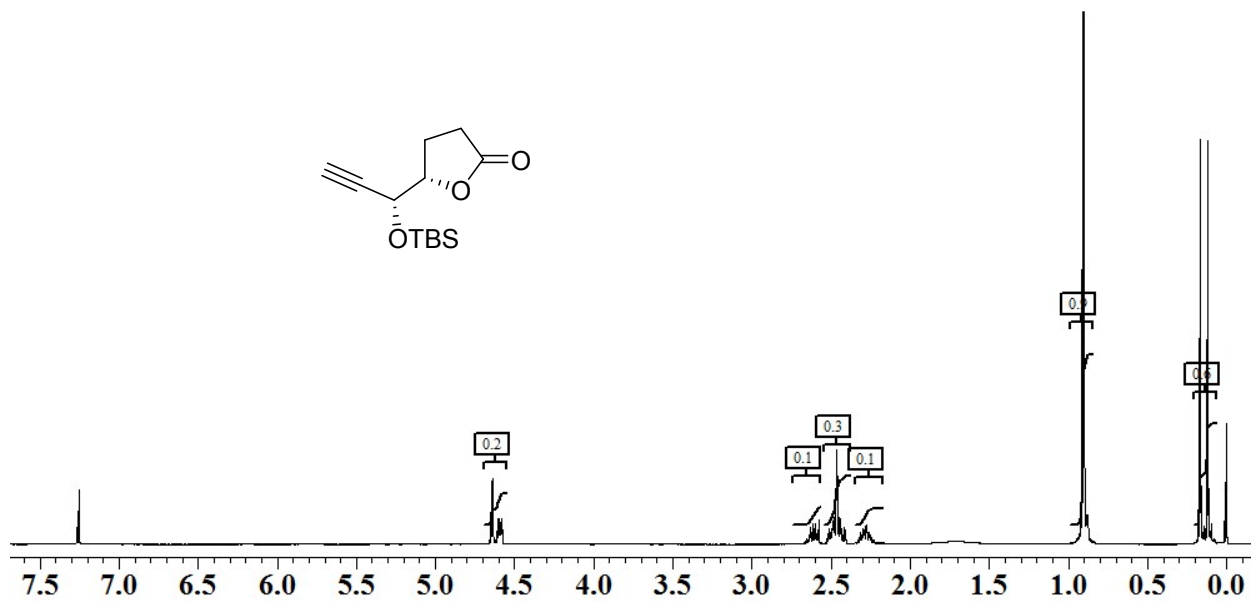

<sup>1</sup>H NMR SPECTRUM (500 MHz, CDCl<sub>3</sub>)

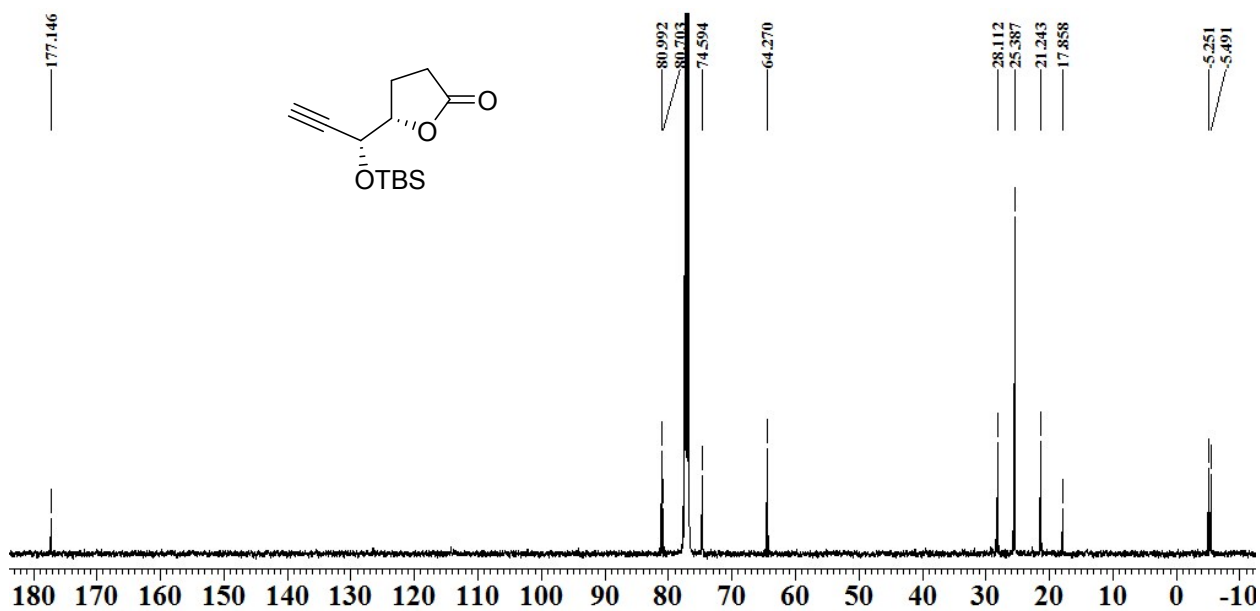

<sup>13</sup>C NMR SPECTRUM (100 MHz, CDCl<sub>3</sub>)

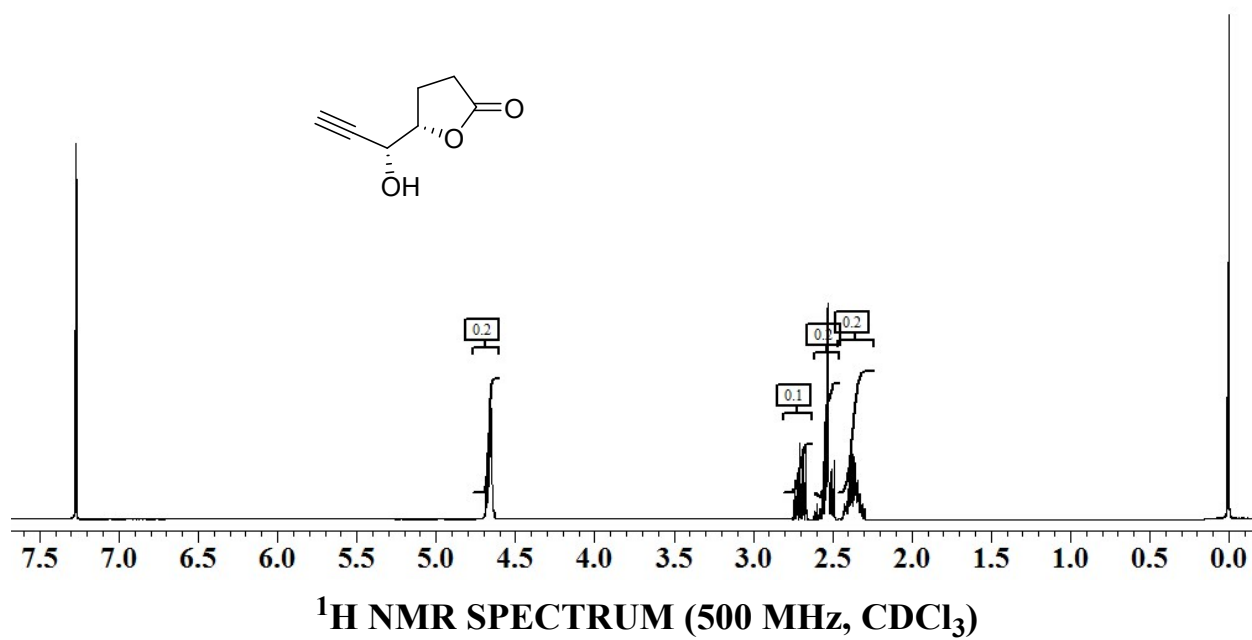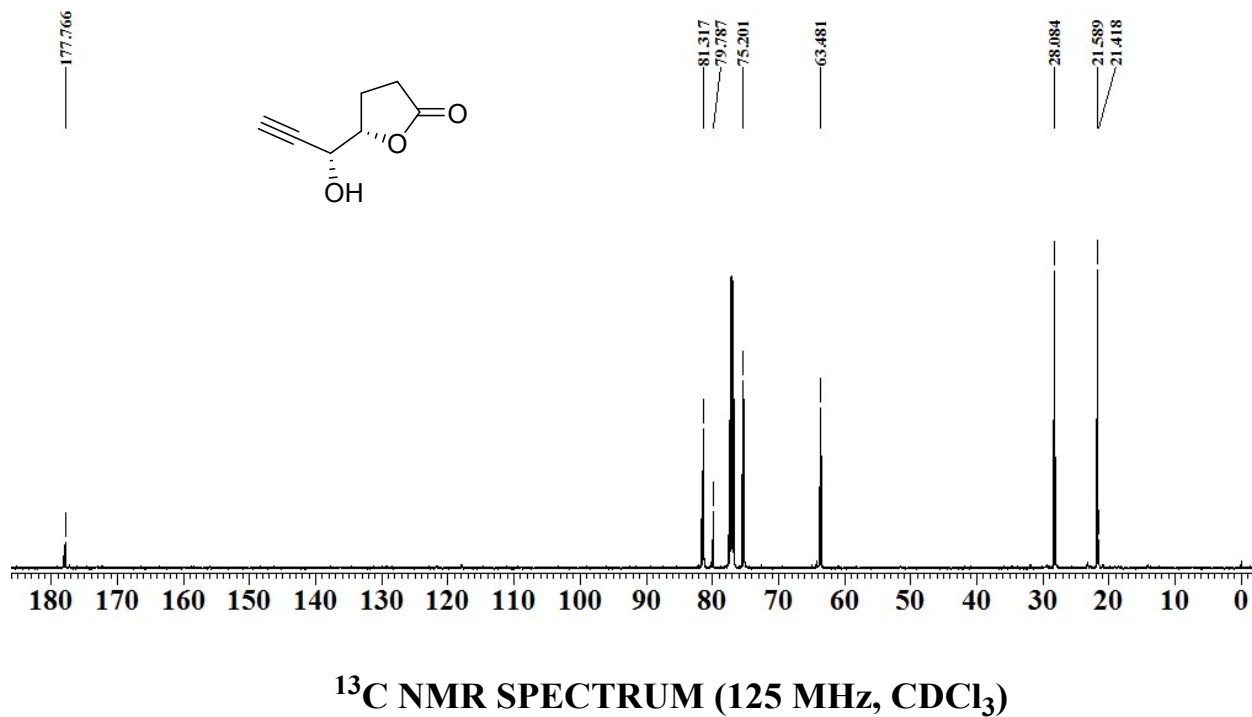

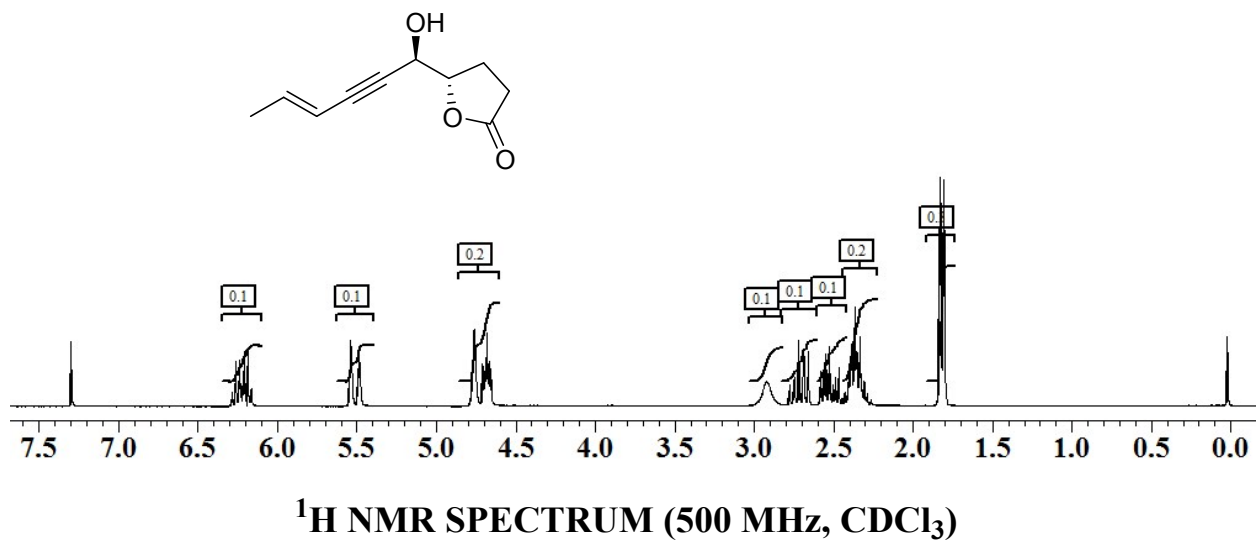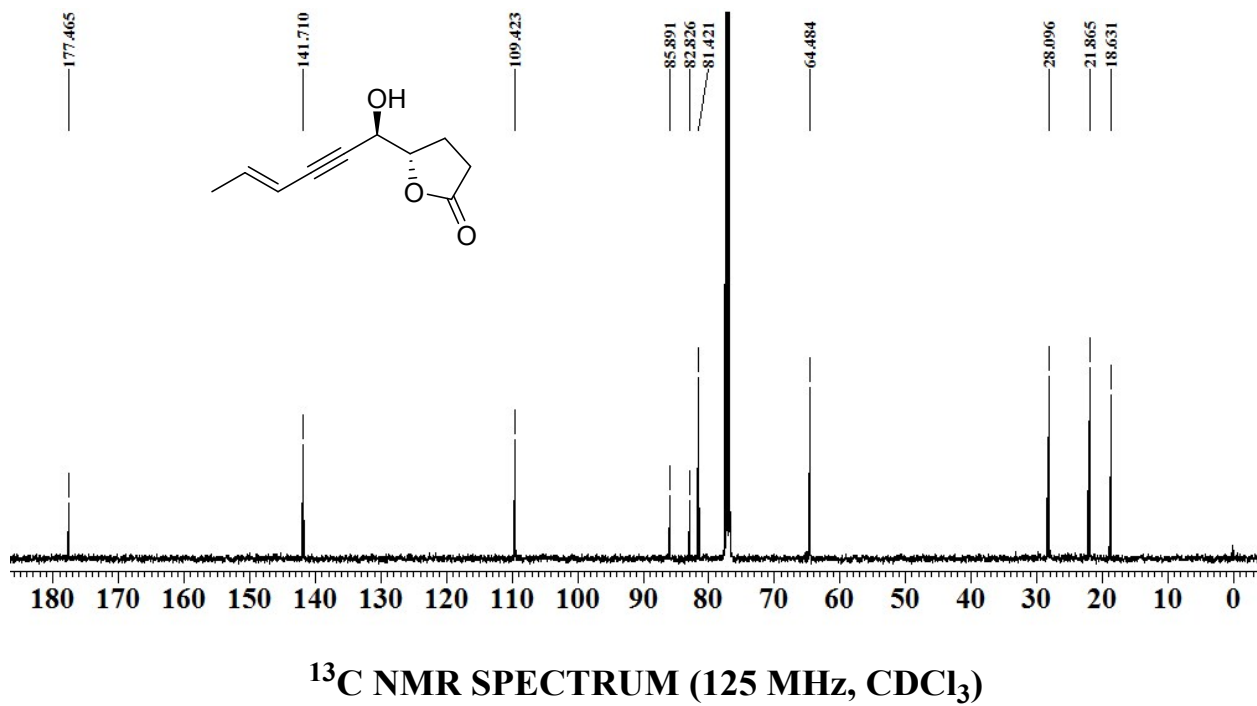

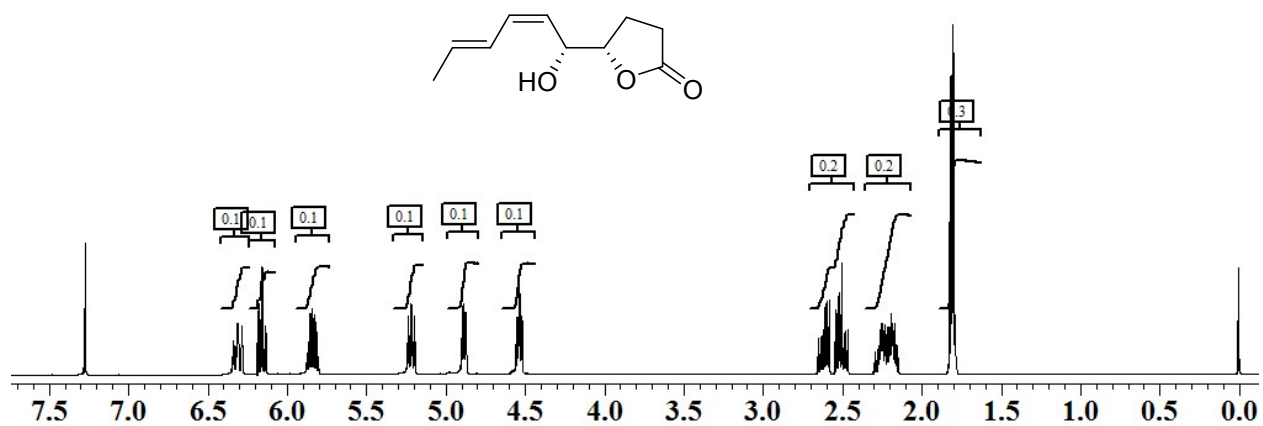

<sup>1</sup>H NMR SPECTRUM (500 MHz, CDCl<sub>3</sub>)

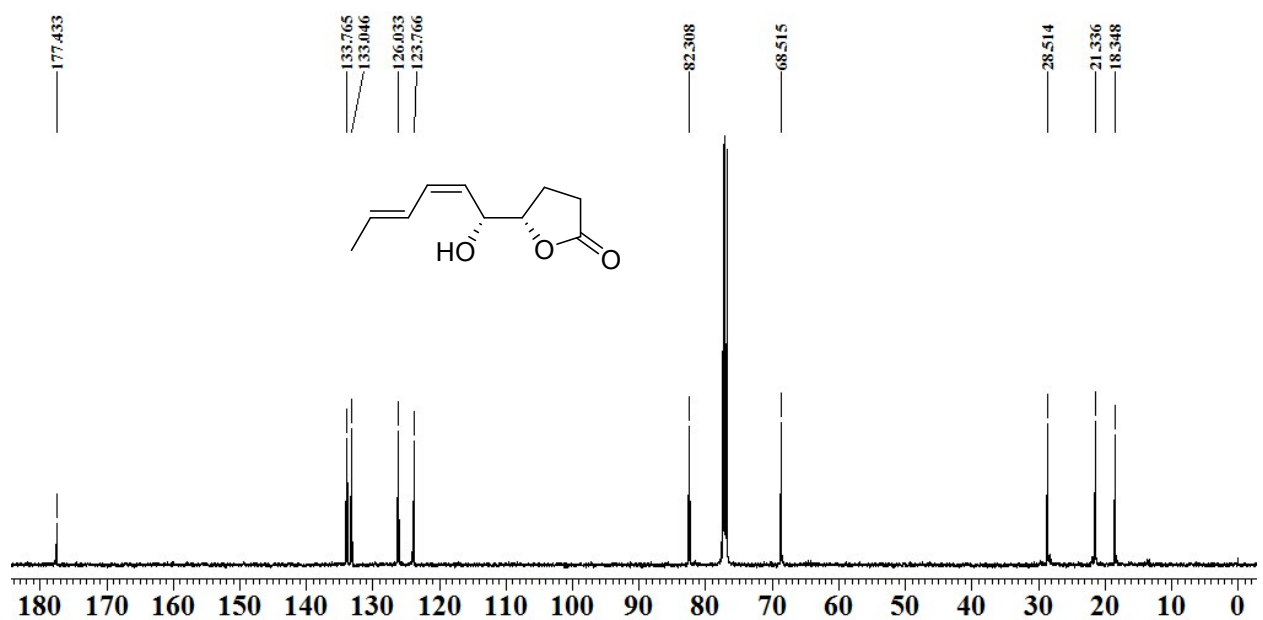

<sup>13</sup>C NMR SPECTRUM (125 MHz, CDCl<sub>3</sub>)

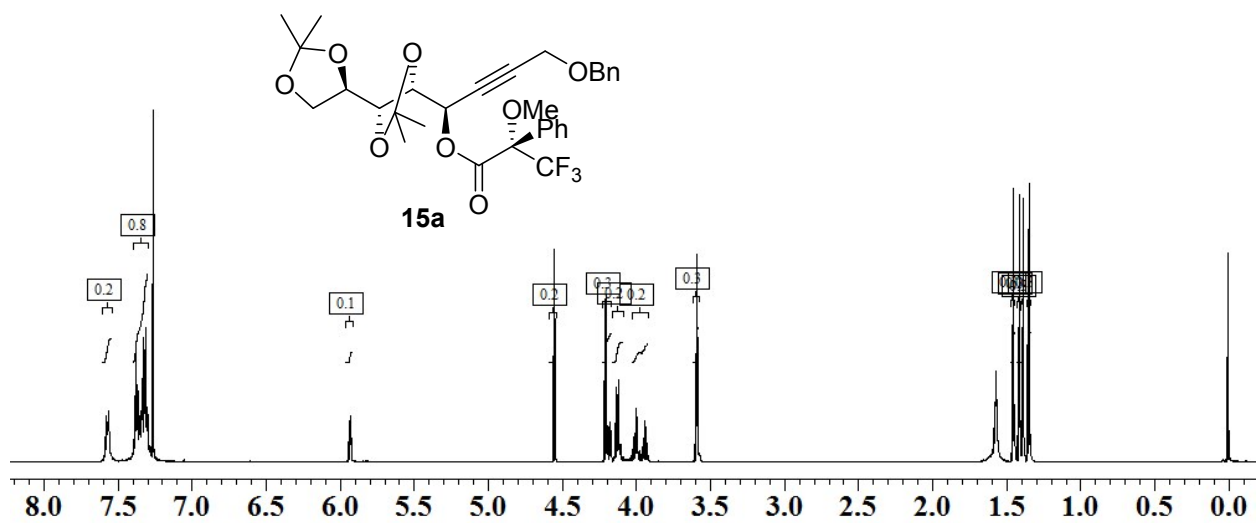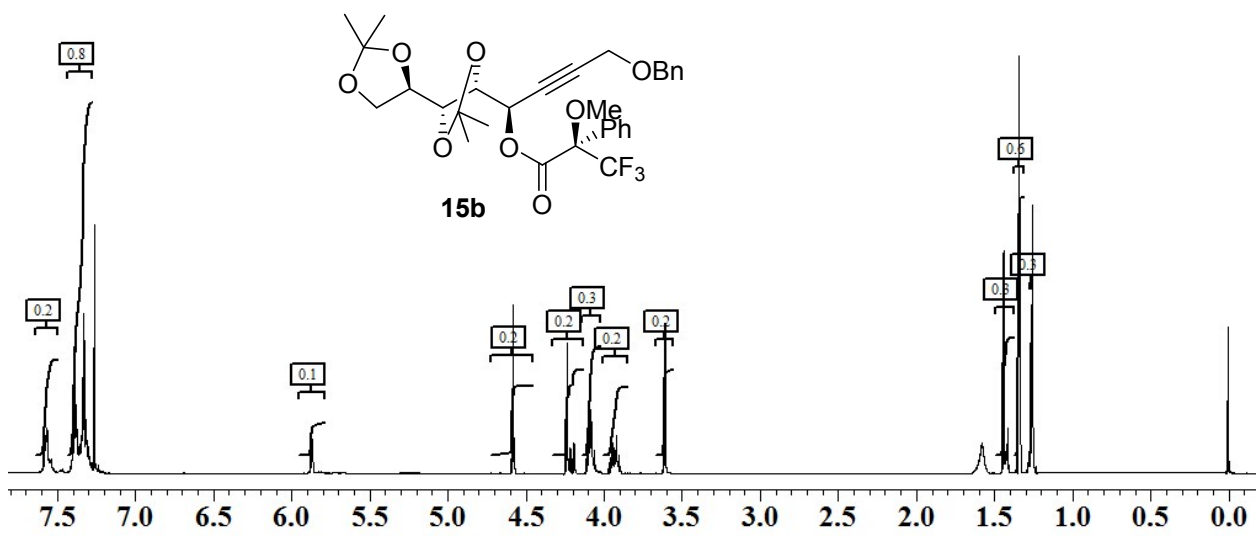

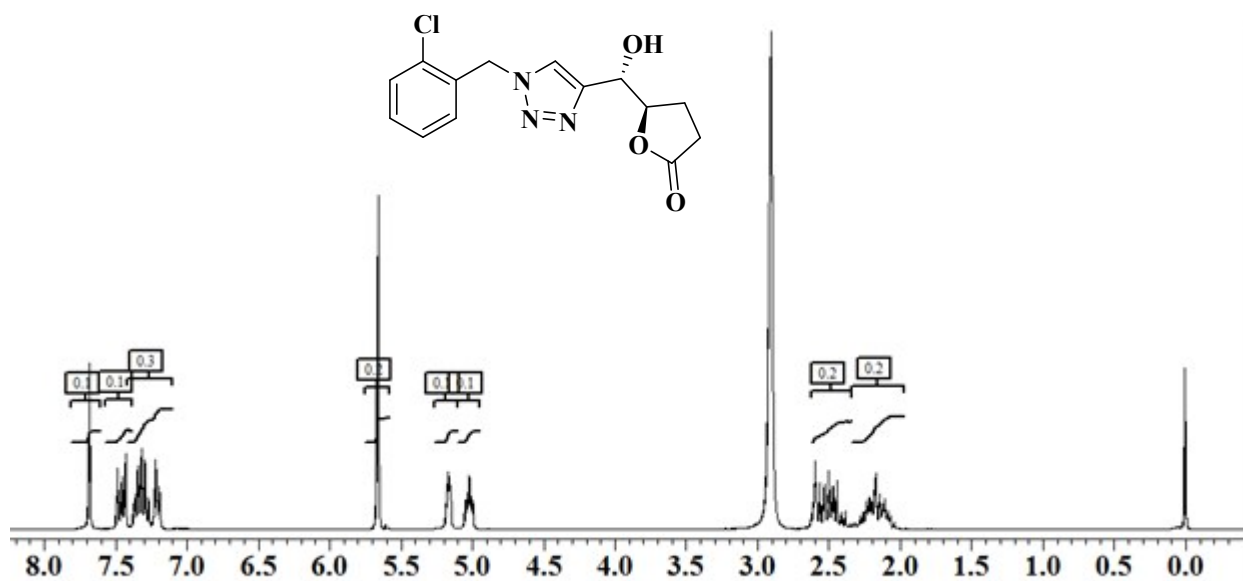

$^1\text{H}$  NMR SPECTRUM (300 MHz,  $\text{CDCl}_3 + \text{DMSO-d}_6$ )

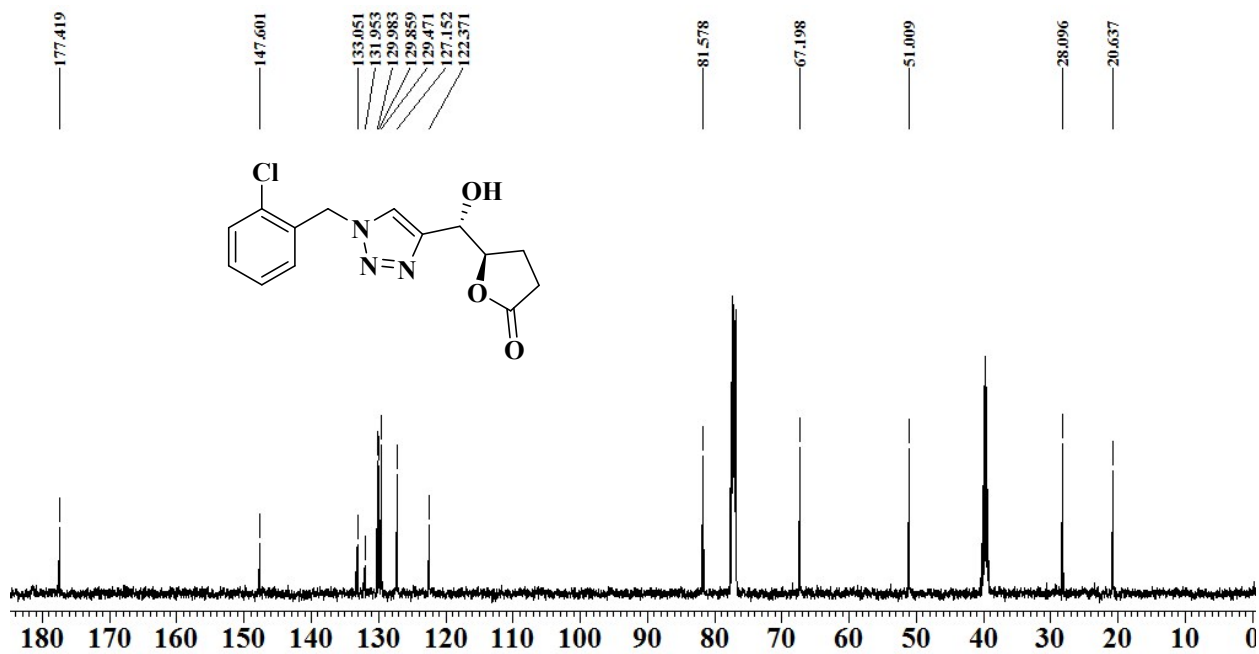

$^{13}\text{C}$  NMR SPECTRUM (125 MHz,  $\text{CDCl}_3 + \text{DMSO-d}_6$ )

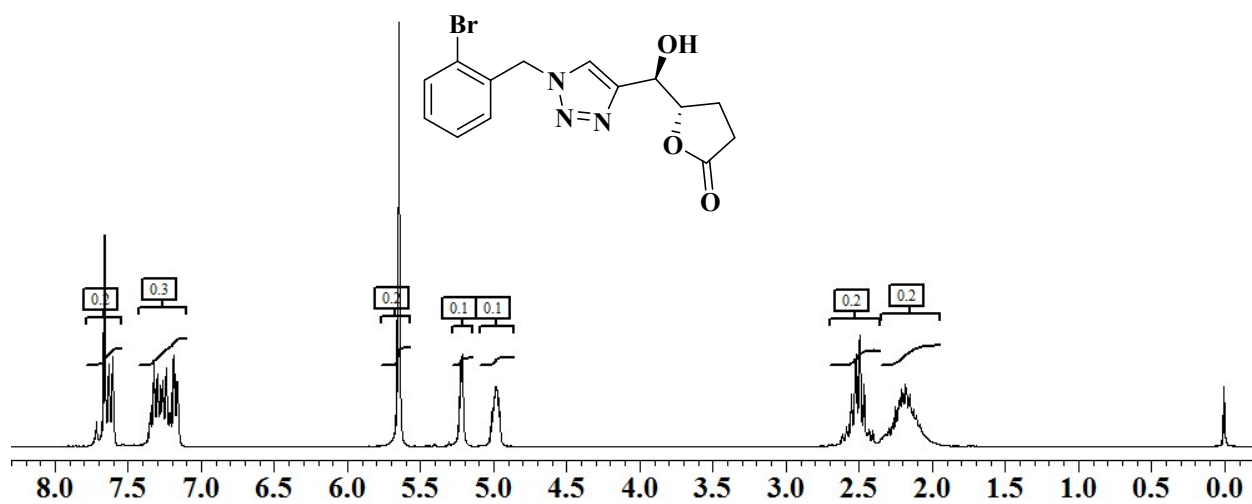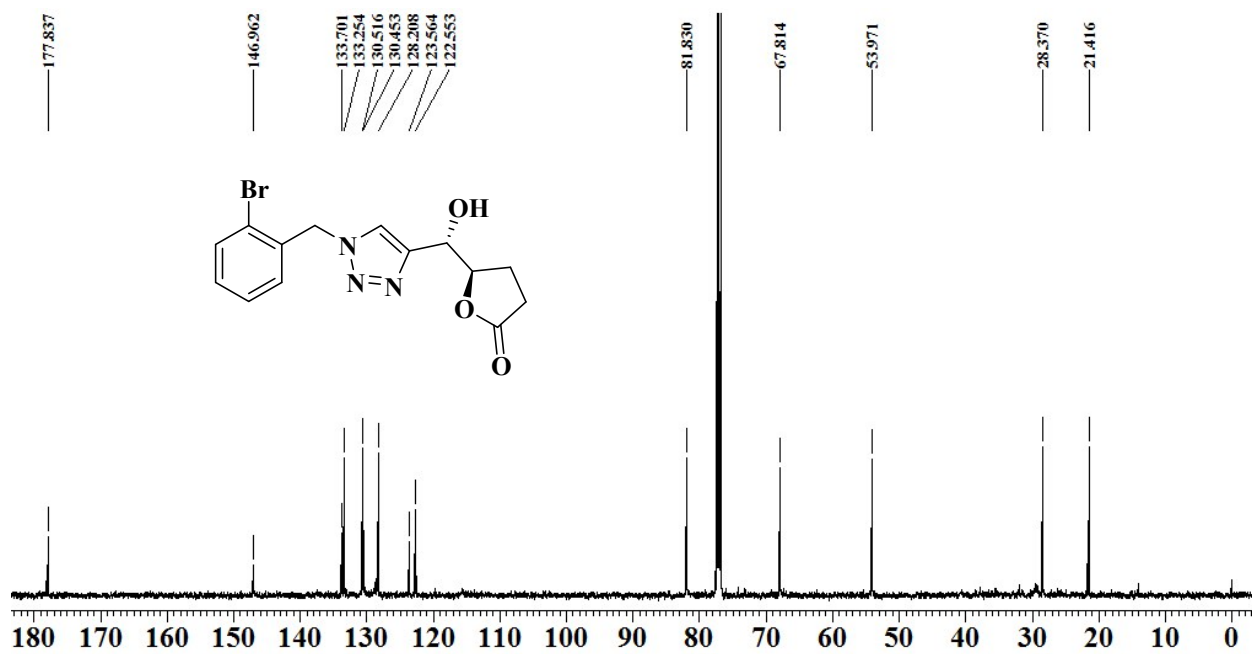

**<sup>13</sup>C NMR SPECTRUM (125 MHz, CDCl<sub>3</sub>)**



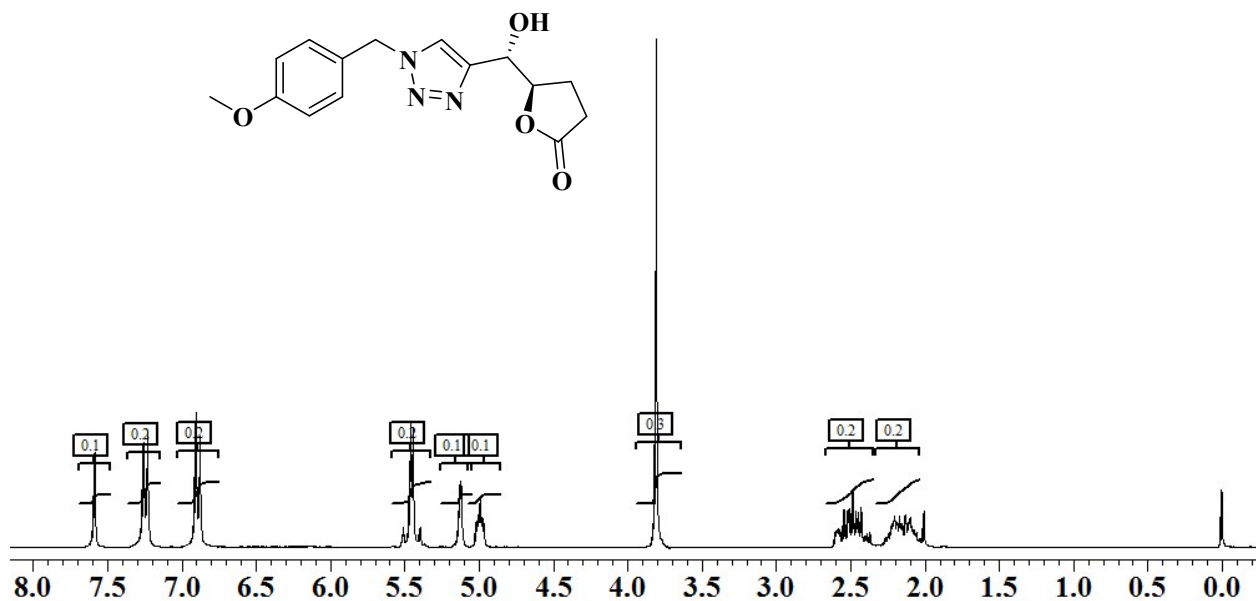

<sup>1</sup>H NMR SPECTRUM (300 MHz, CDCl<sub>3</sub>)

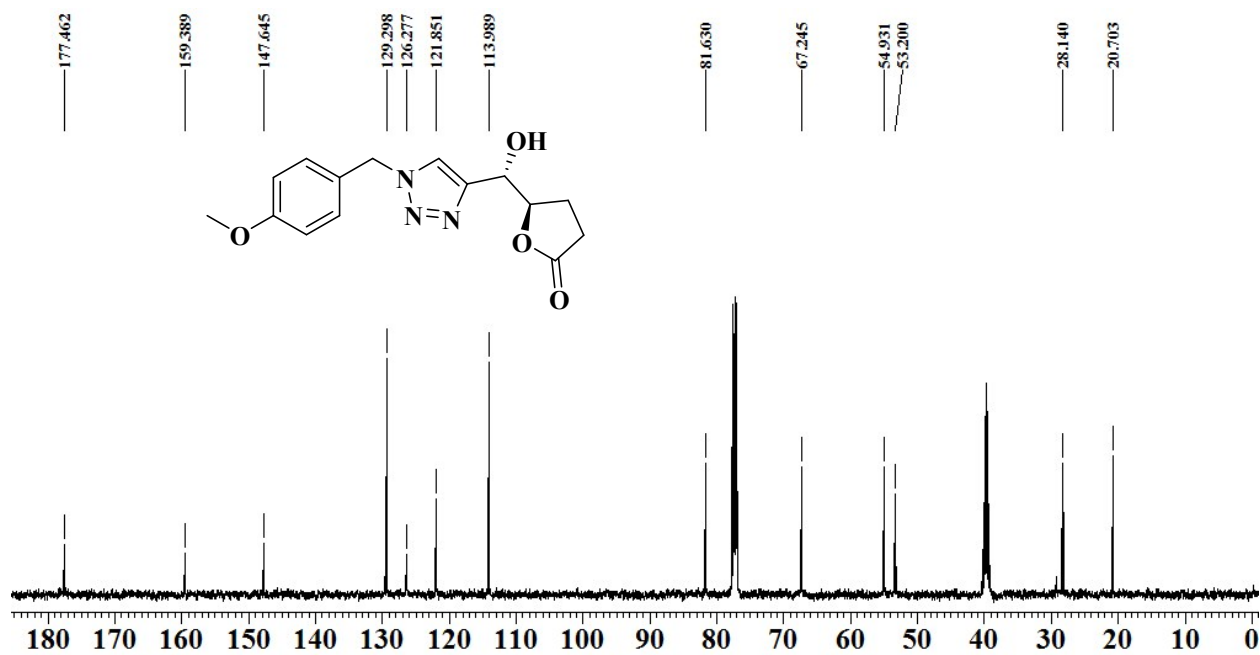

<sup>13</sup>C NMR SPECTRUM (125 MHz, CDCl<sub>3</sub> + DMSO-d<sub>6</sub>)

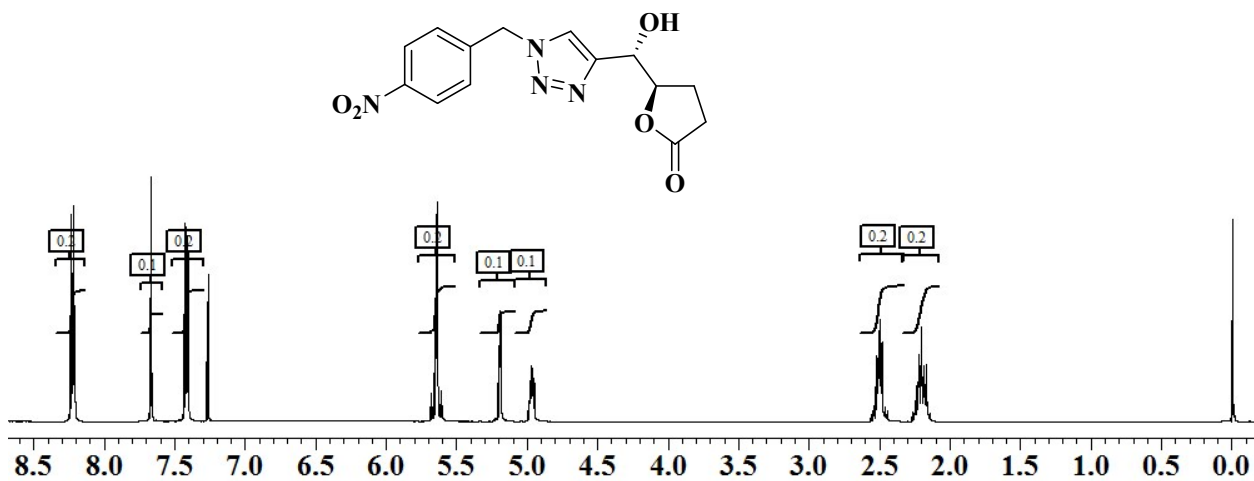

<sup>1</sup>H NMR SPECTRUM (500 MHz, CDCl<sub>3</sub>)

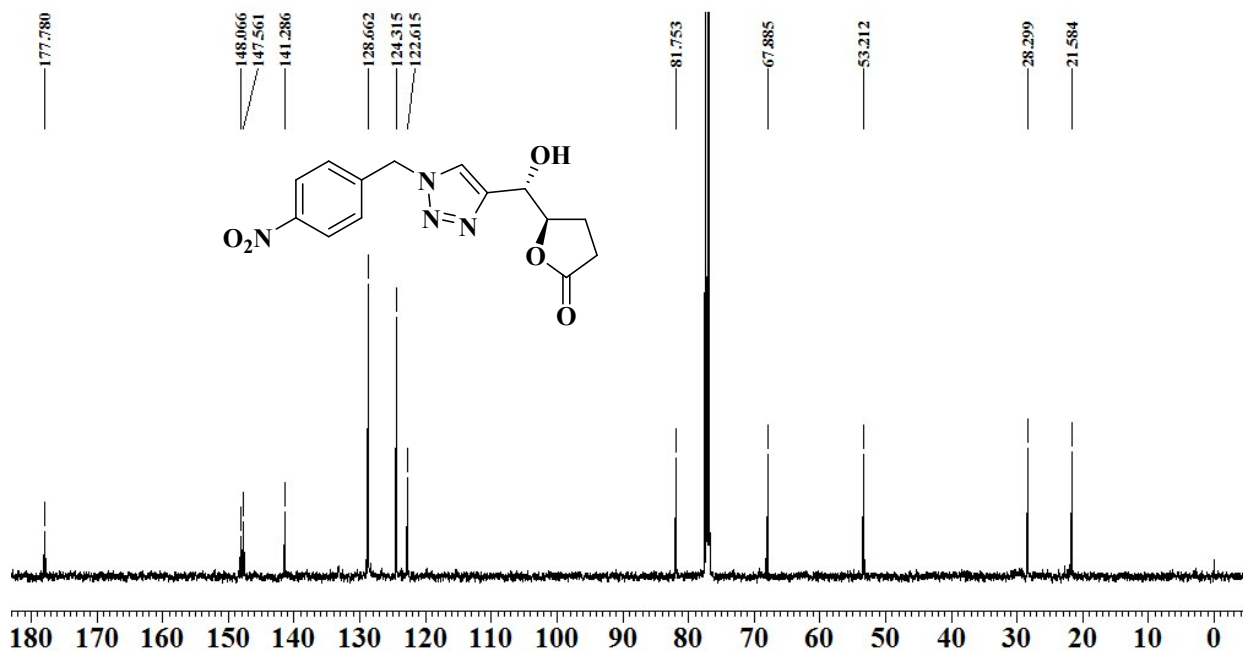

<sup>13</sup>C NMR SPECTRUM (125 MHz, CDCl<sub>3</sub>)

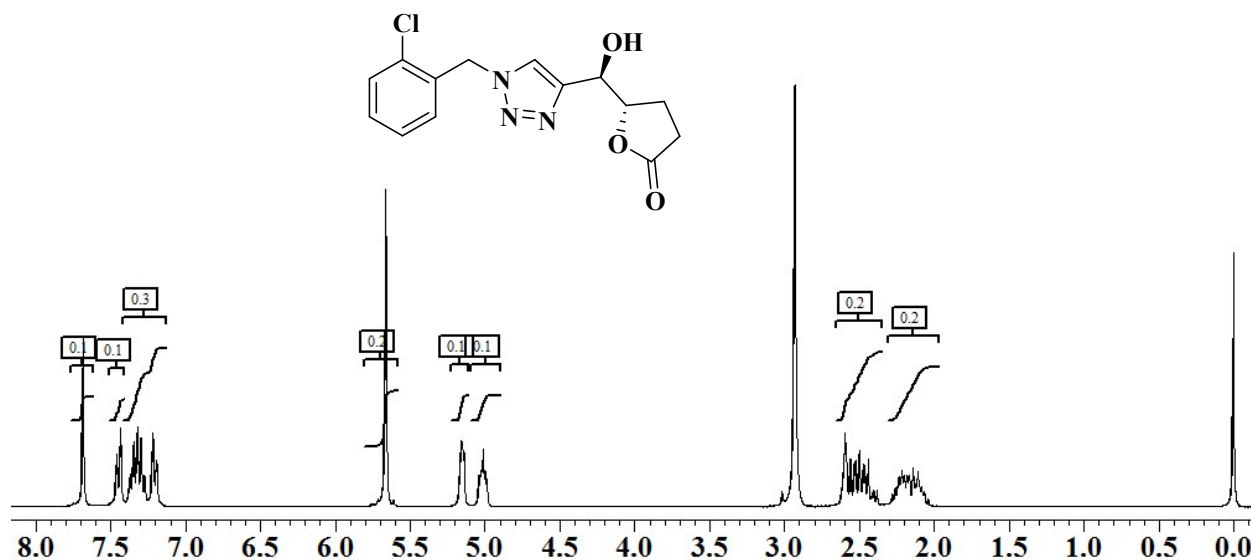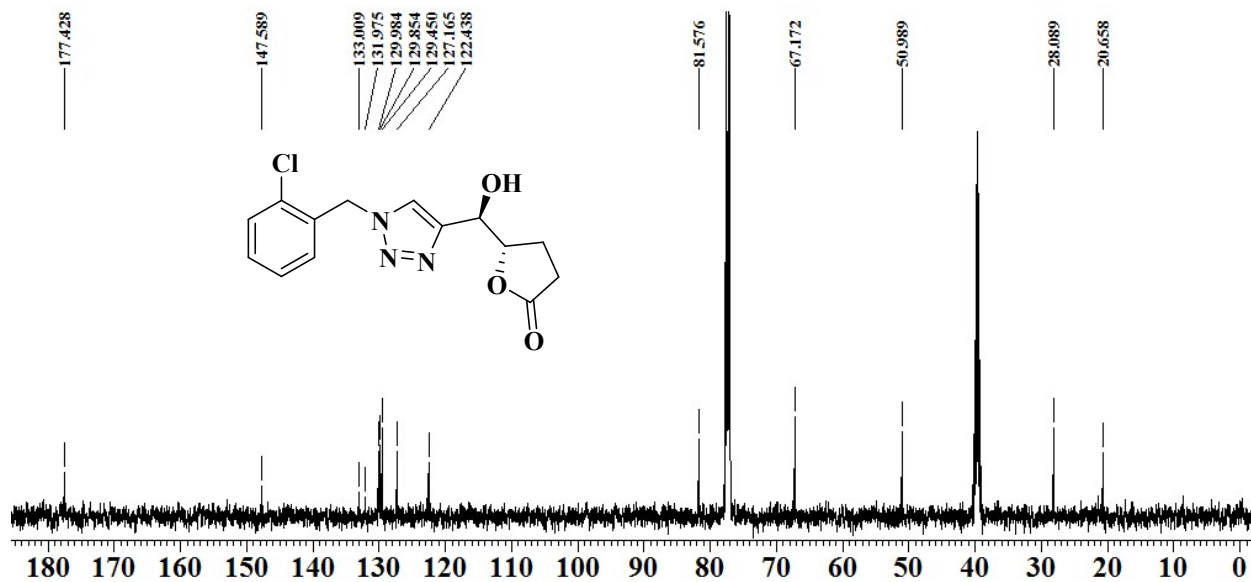

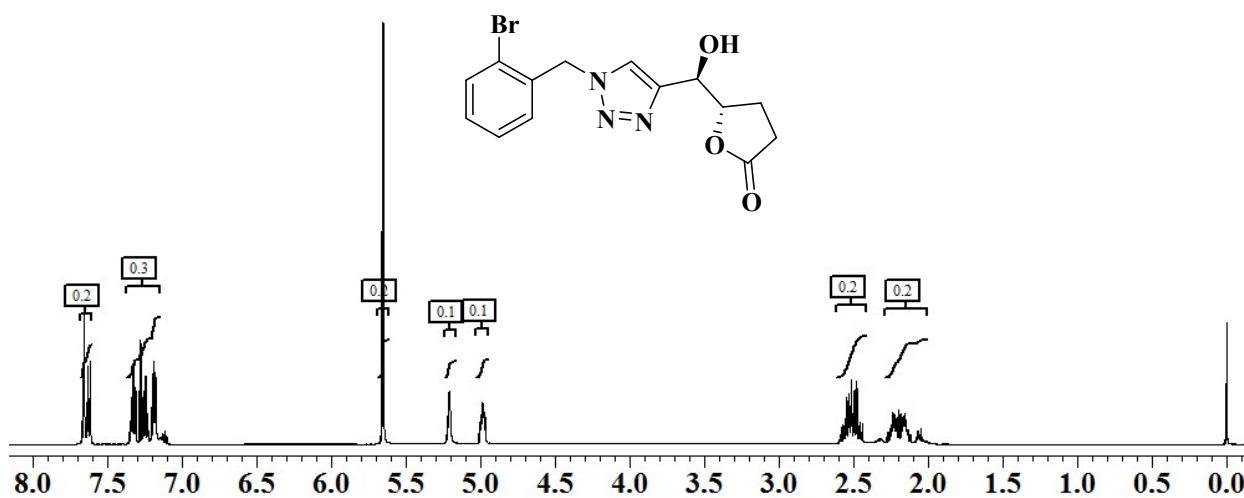

<sup>1</sup>H NMR SPECTRUM (500 MHz, CDCl<sub>3</sub>)

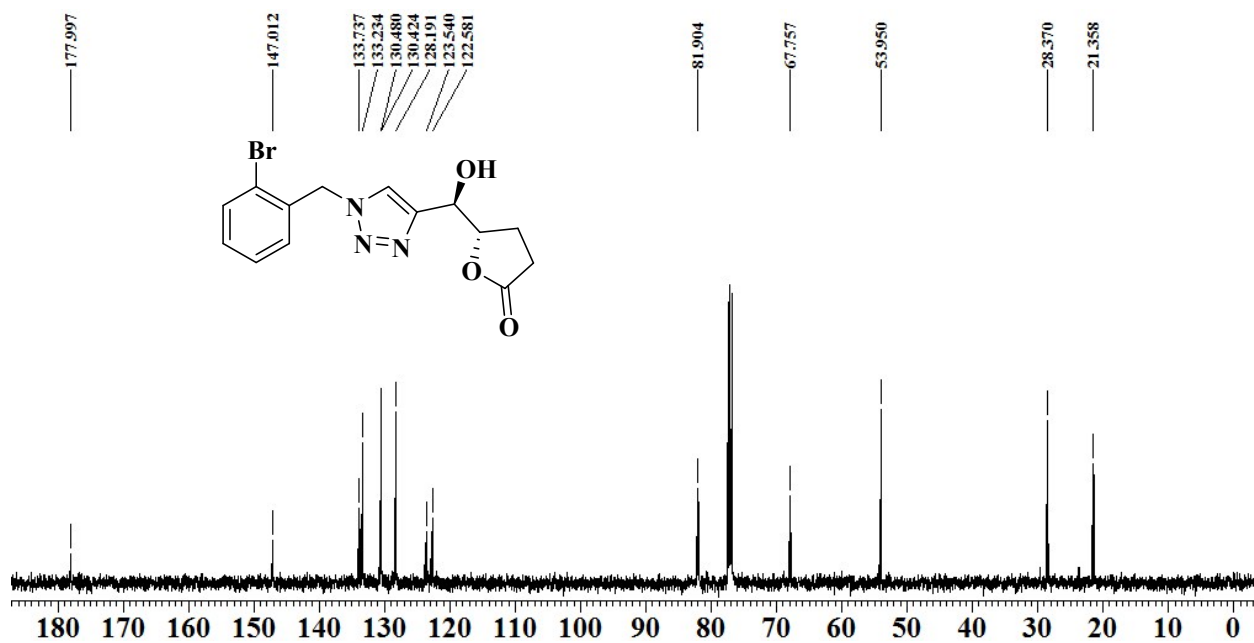

<sup>13</sup>C NMR SPECTRUM (125 MHz, CDCl<sub>3</sub>)

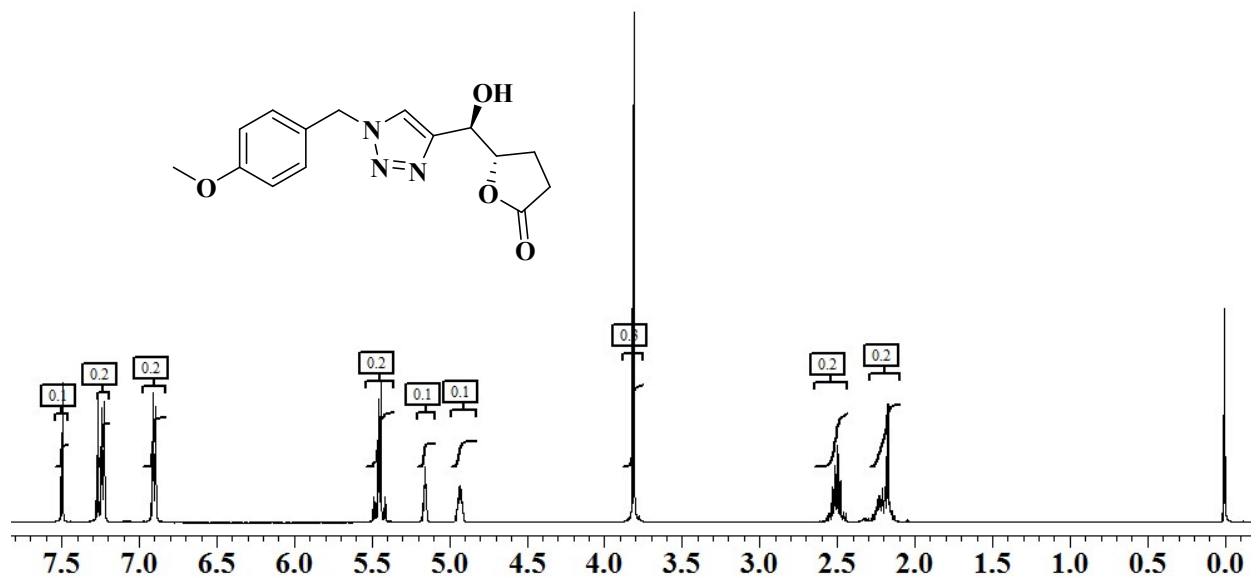

$^1\text{H}$  NMR SPECTRUM (500 MHz,  $\text{CDCl}_3$ )

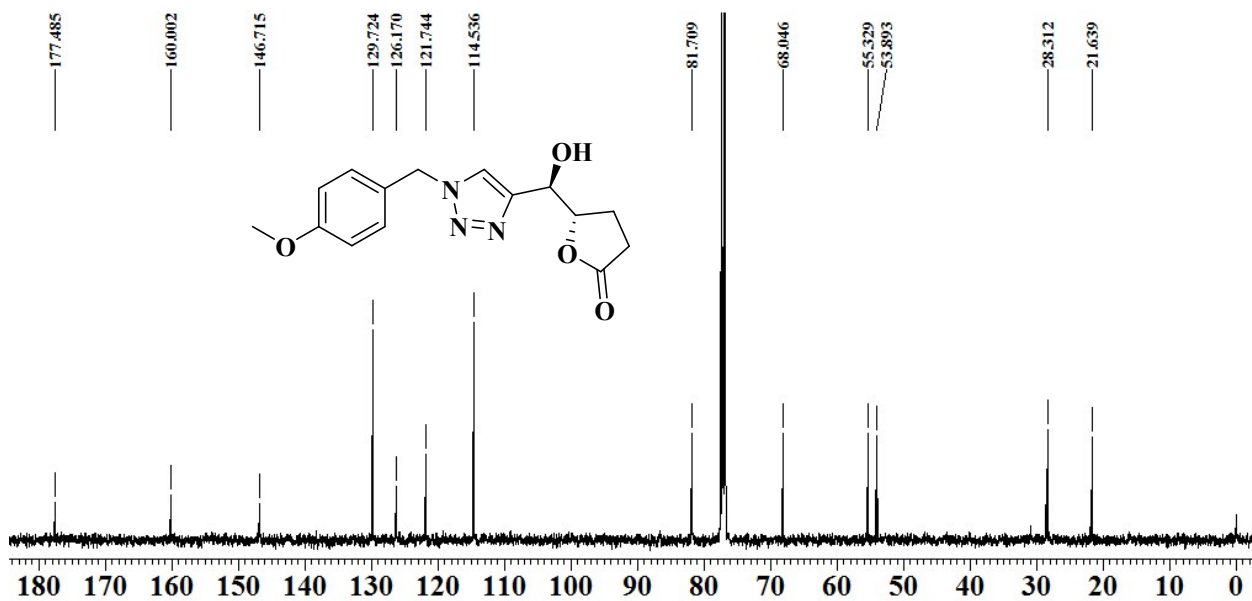

$^{13}\text{C}$  NMR SPECTRUM (125 MHz,  $\text{CDCl}_3$ )

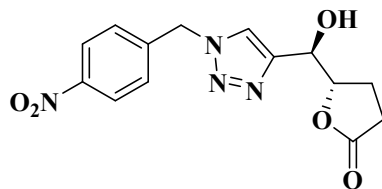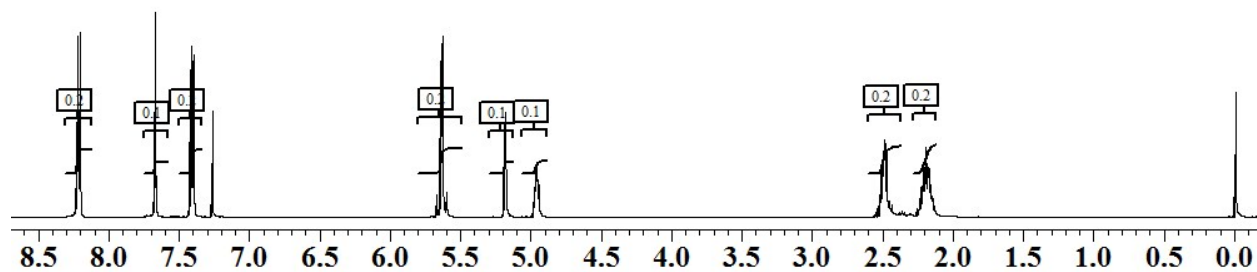

$^1\text{H}$  NMR SPECTRUM (500 MHz,  $\text{CDCl}_3$ )

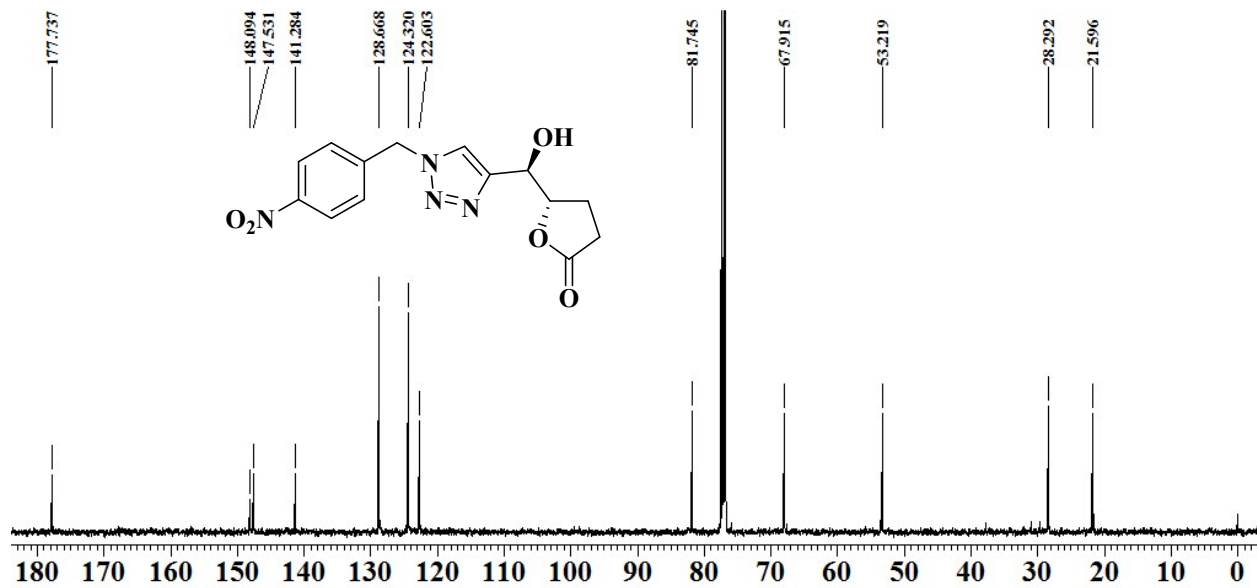

$^{13}\text{C}$  NMR SPECTRUM (125 MHz,  $\text{CDCl}_3$ )

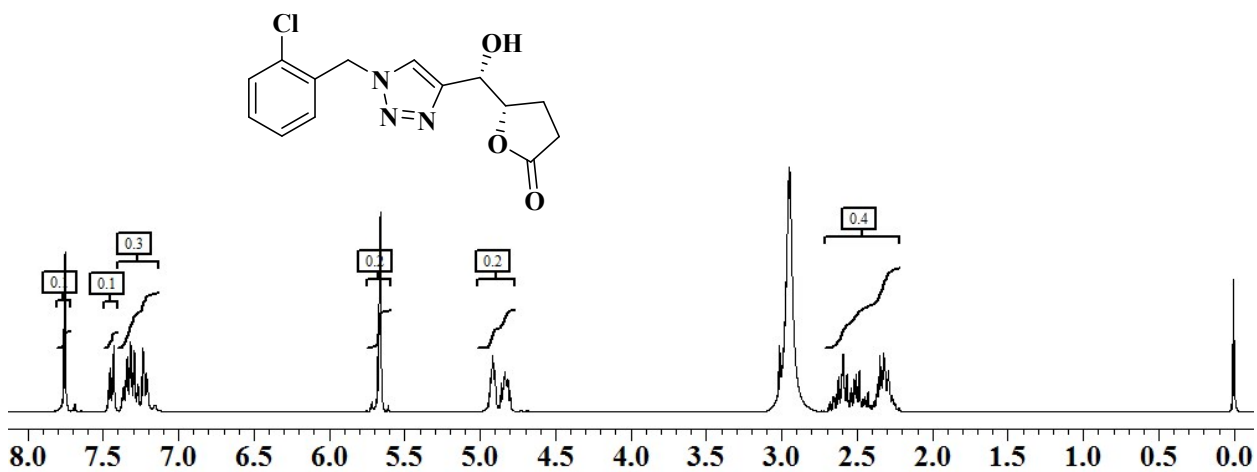

$^1\text{H}$  NMR SPECTRUM (300 MHz,  $\text{CDCl}_3 + \text{DMSO-d}_6$ )

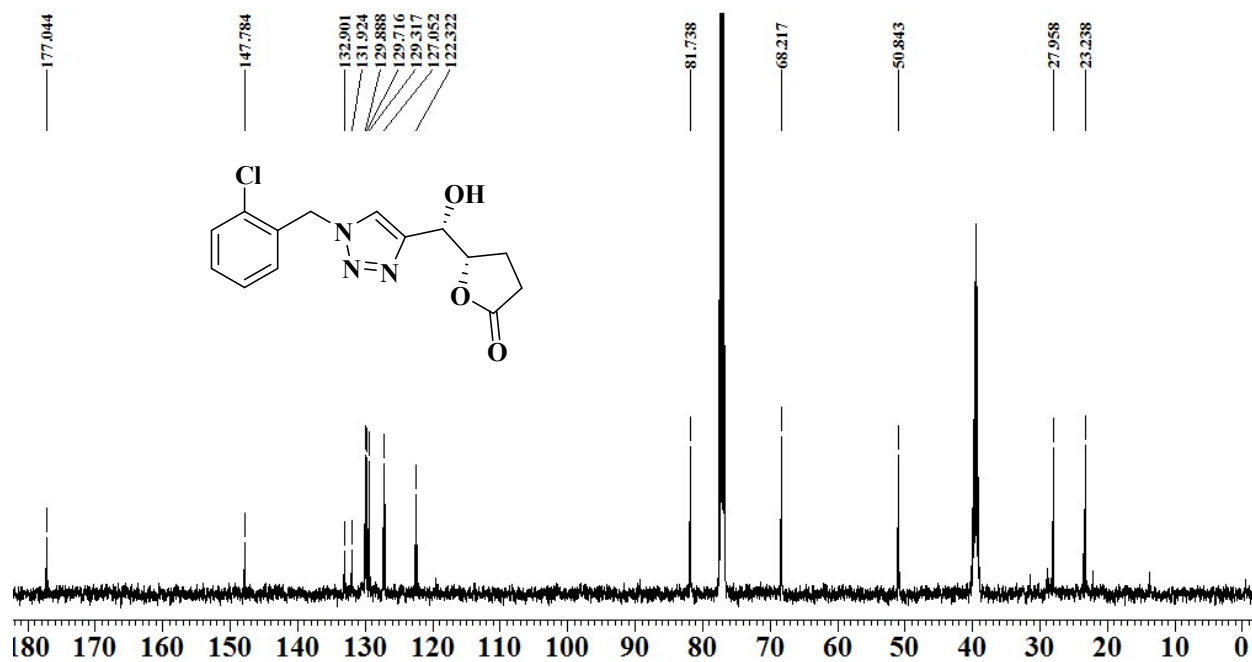

$^{13}\text{C}$  NMR SPECTRUM (125 MHz,  $\text{CDCl}_3 + \text{DMSO-d}_6$ )

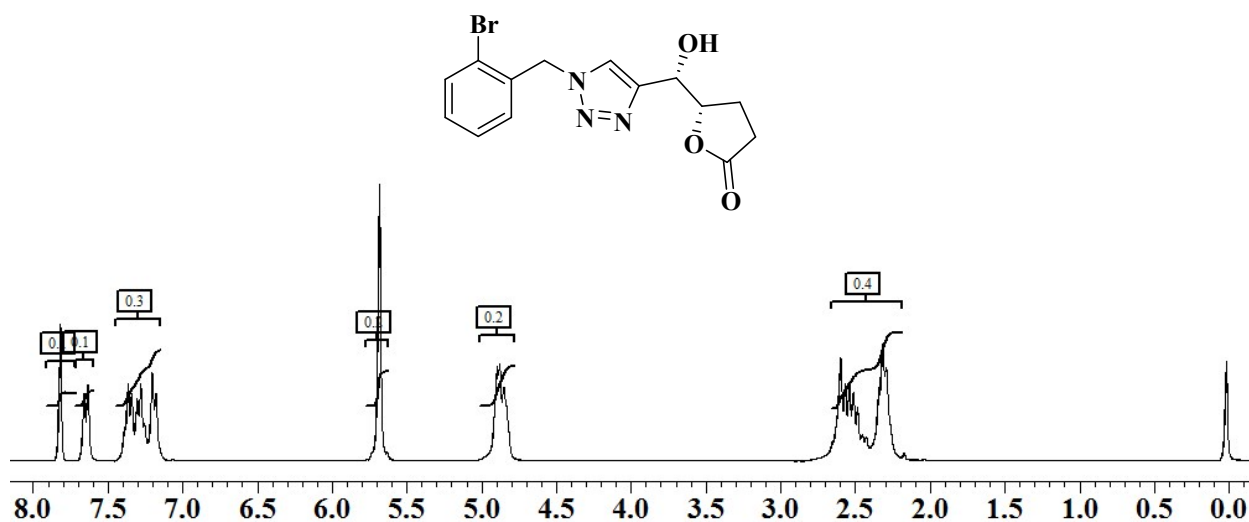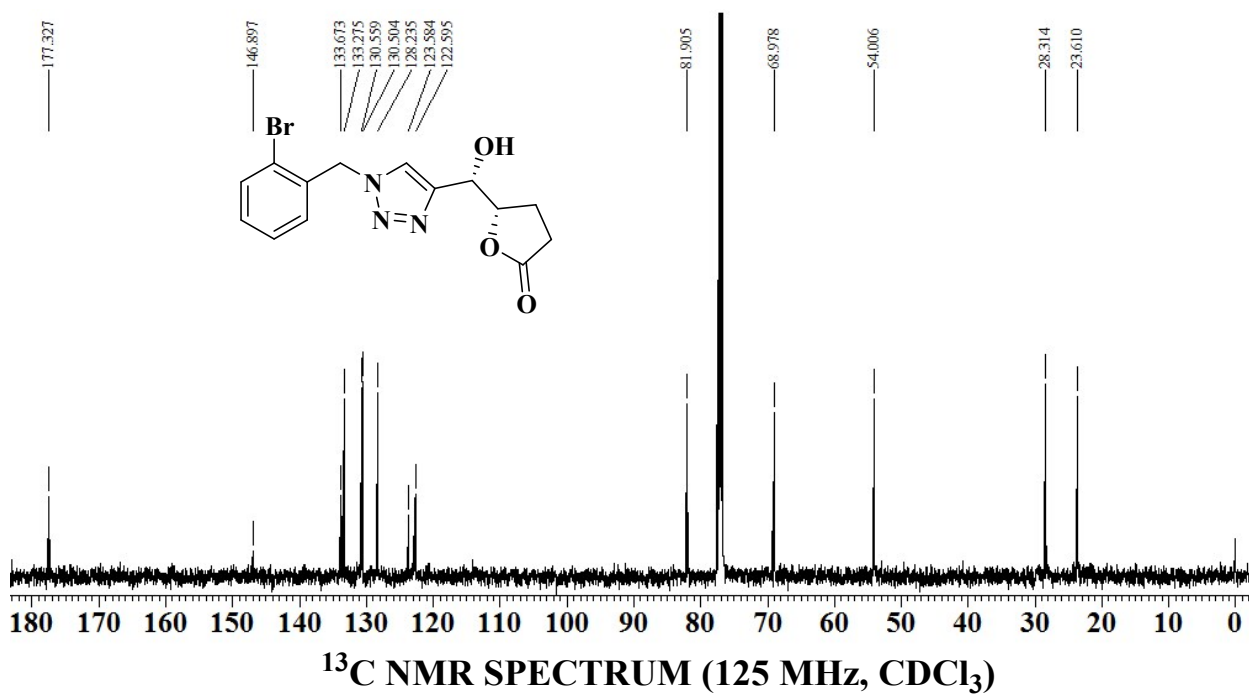



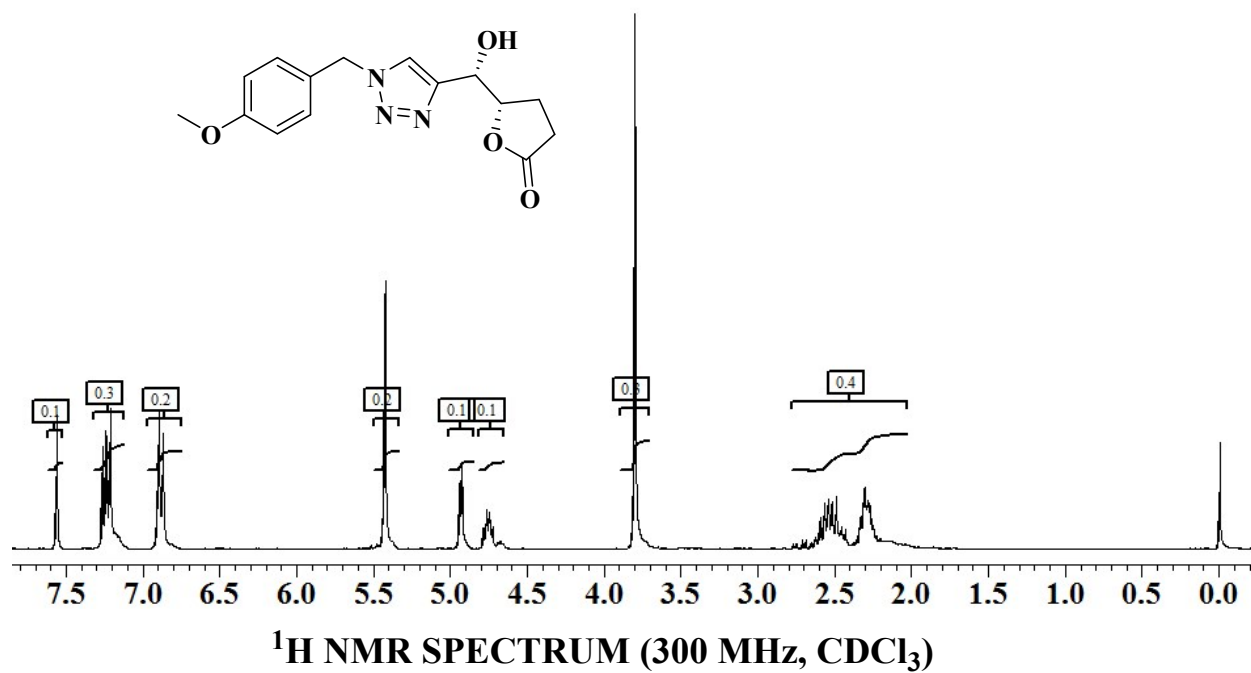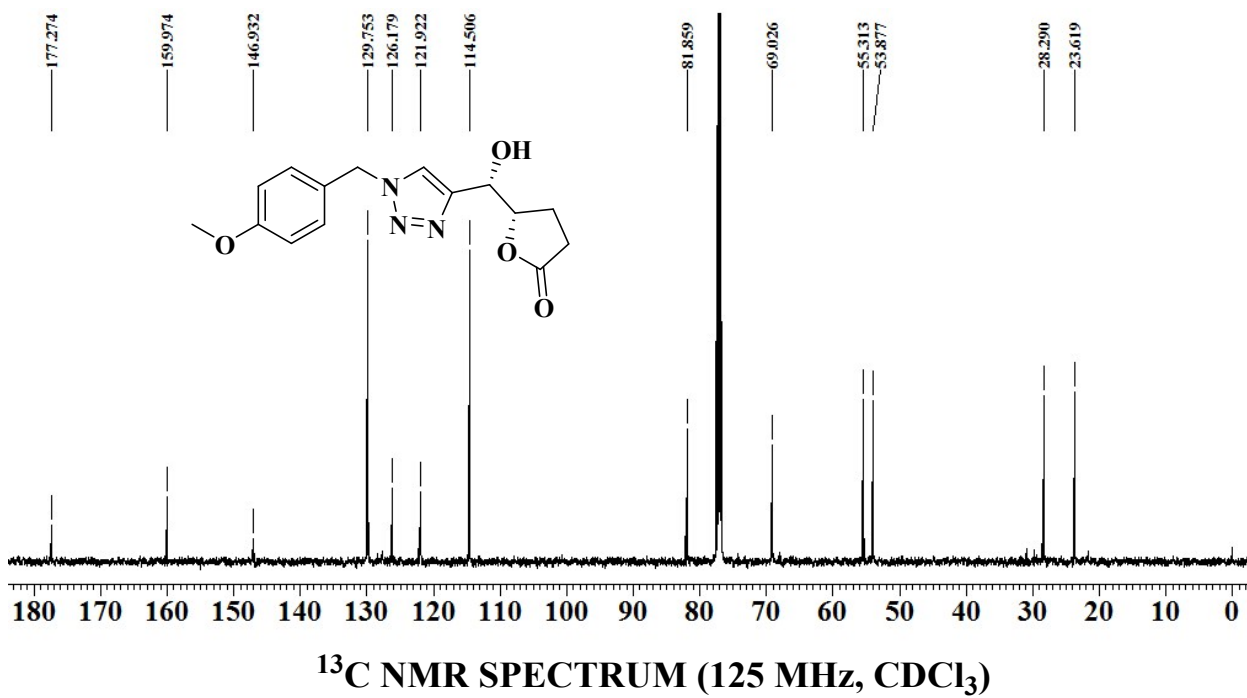

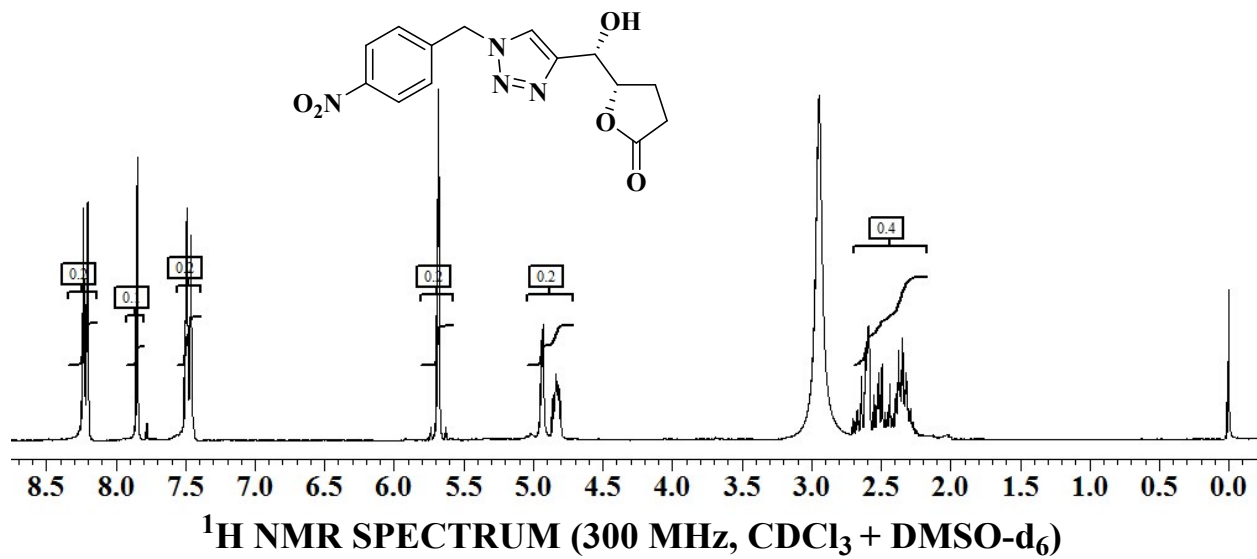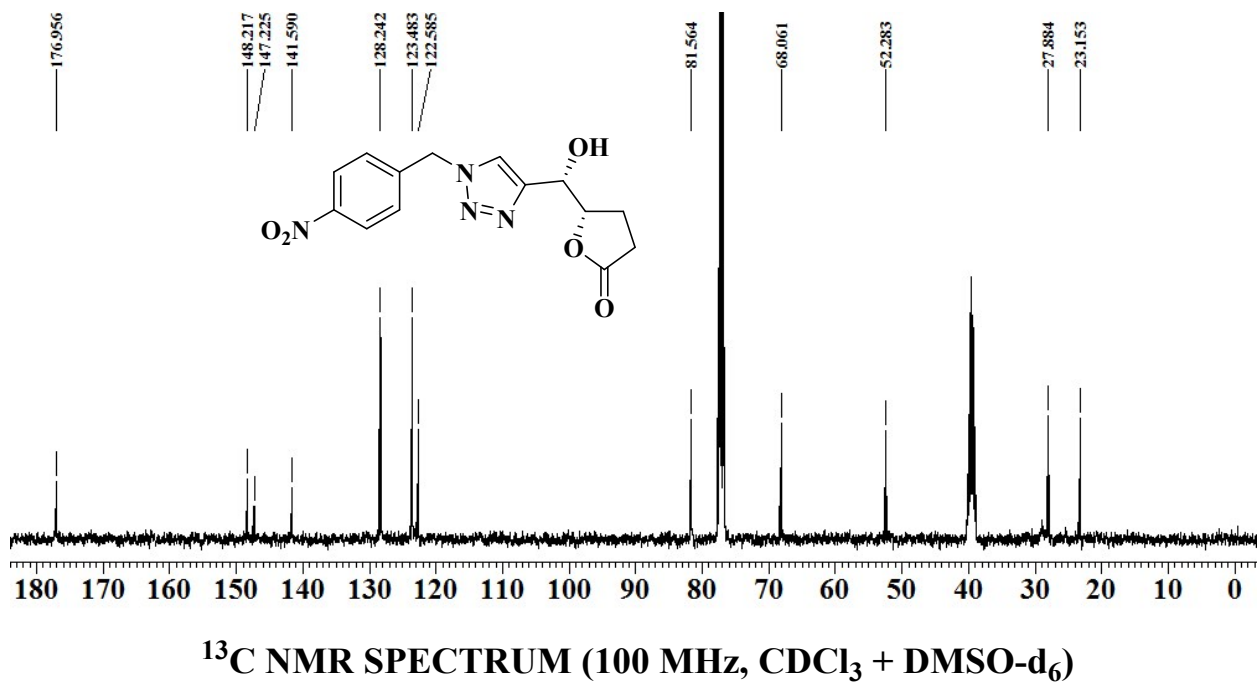

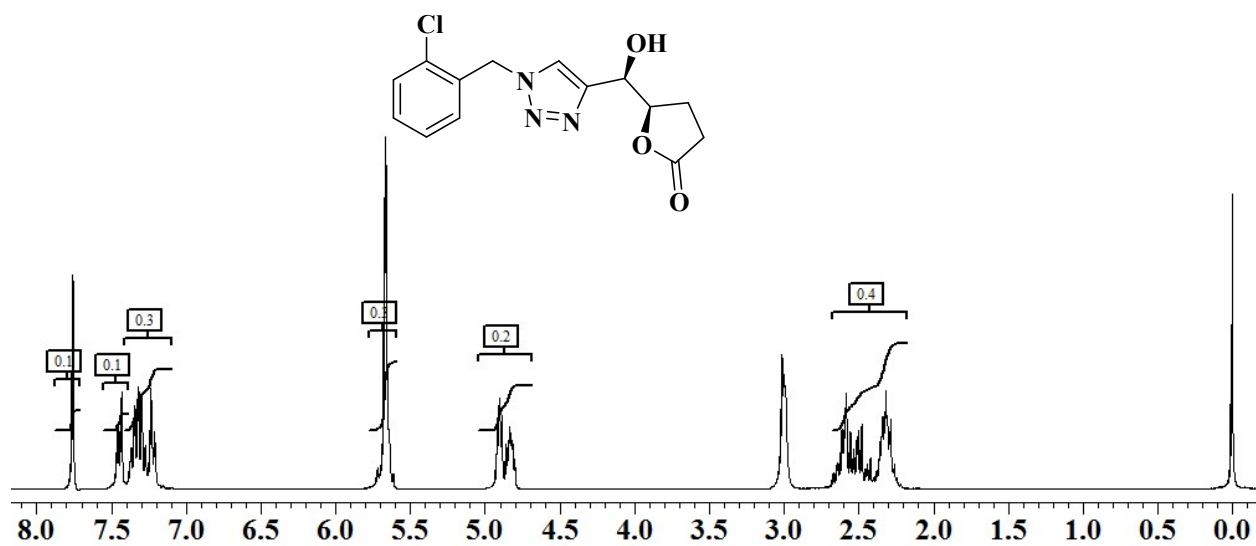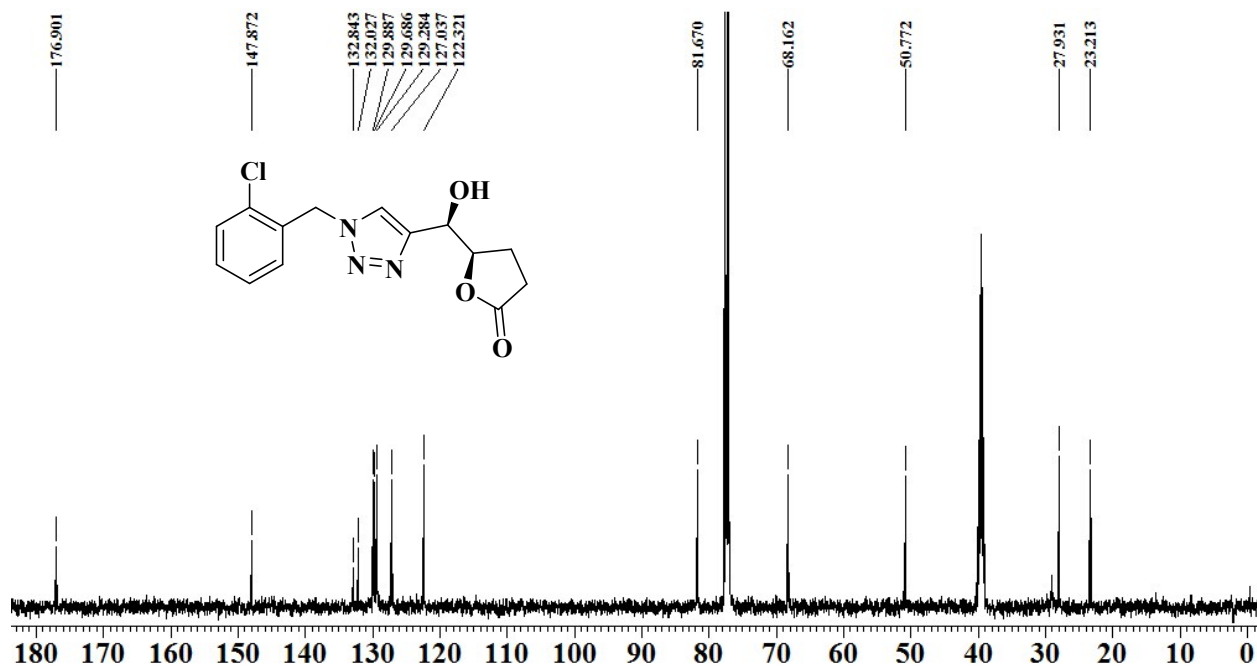

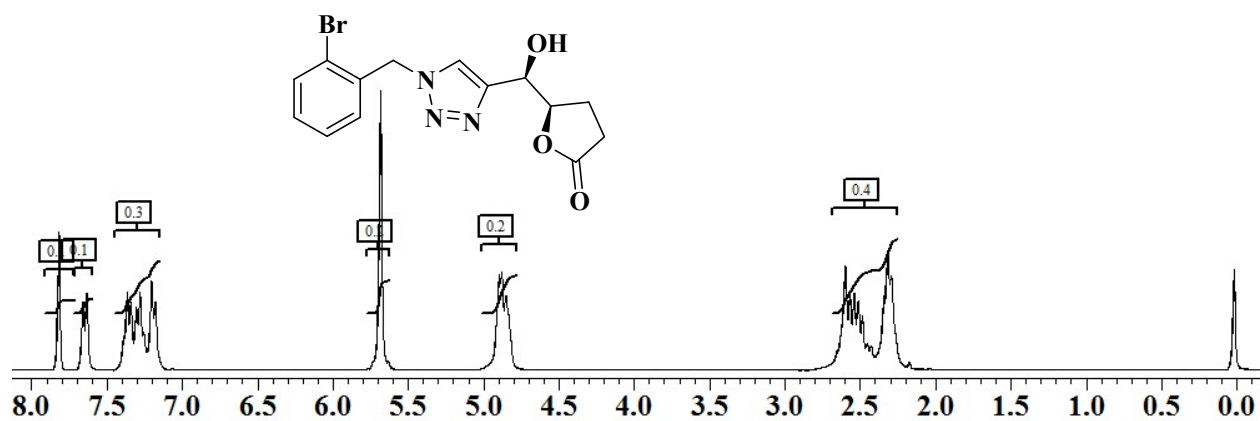

**<sup>1</sup>H NMR SPECTRUM (400 MHz, CDCl<sub>3</sub> + DMSO-d<sub>6</sub>)**

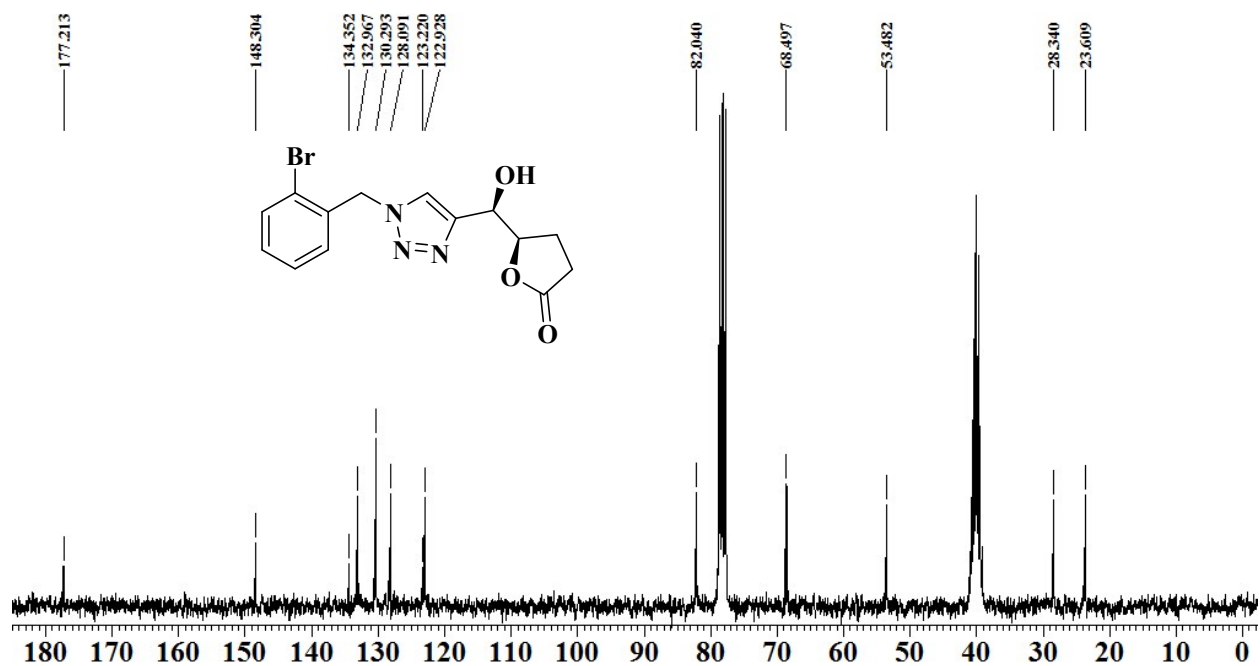

**<sup>13</sup>C NMR SPECTRUM (75 MHz, CDCl<sub>3</sub> + DMSO-d<sub>6</sub>)**

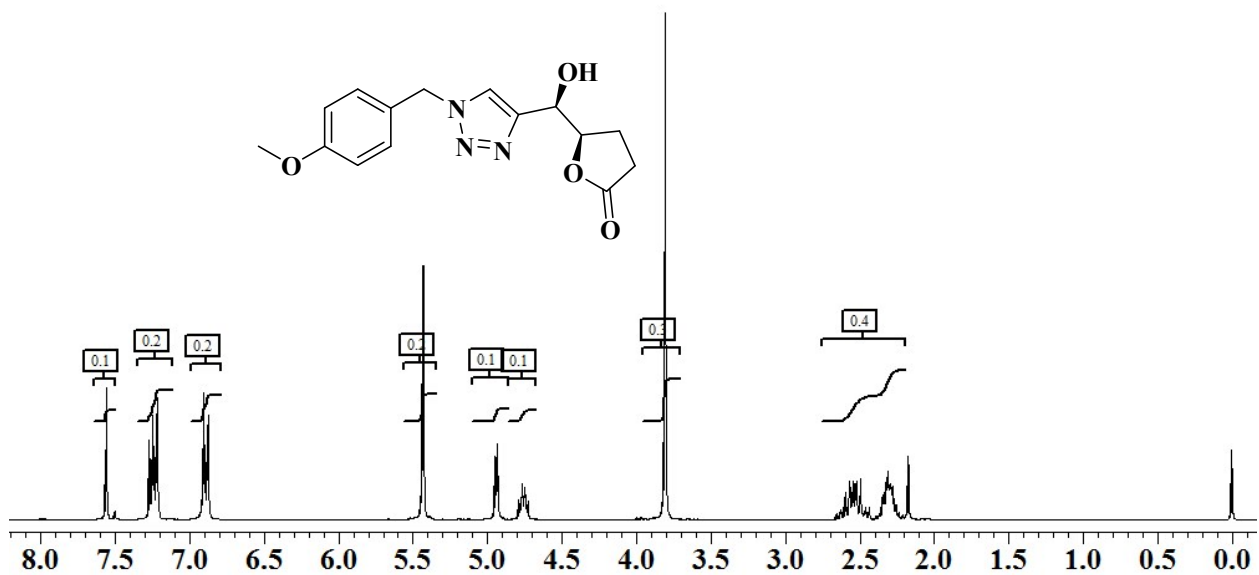

<sup>1</sup>H NMR SPECTRUM (300 MHz, CDCl<sub>3</sub>)

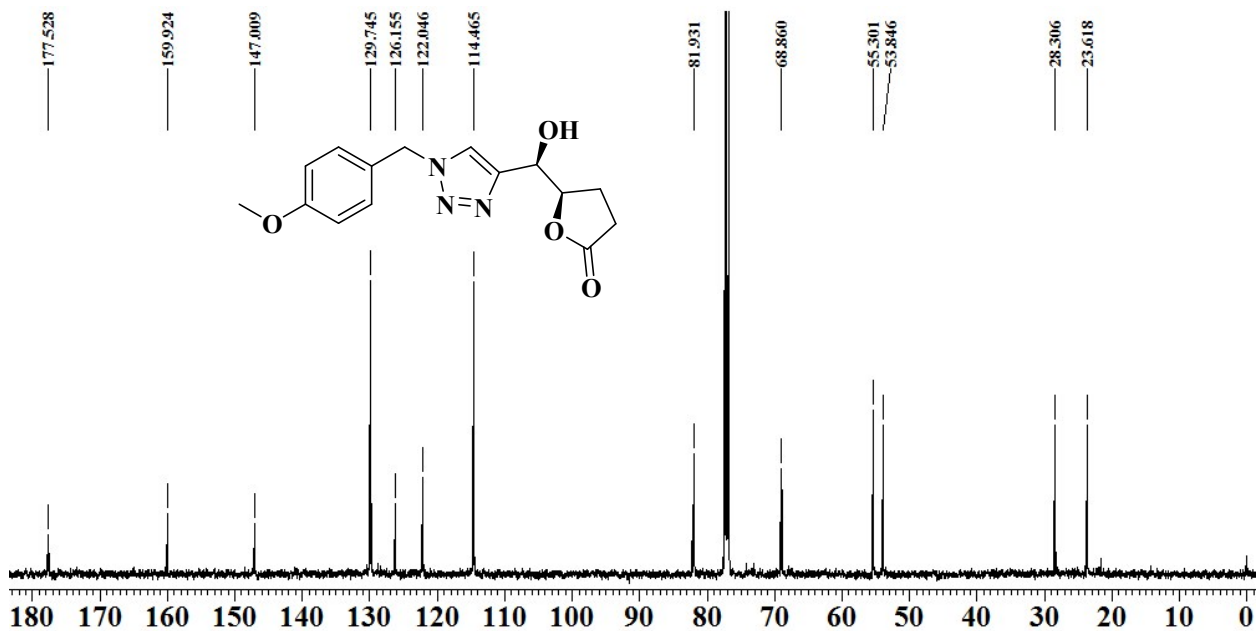

<sup>13</sup>C NMR SPECTRUM (125 MHz, CDCl<sub>3</sub>)

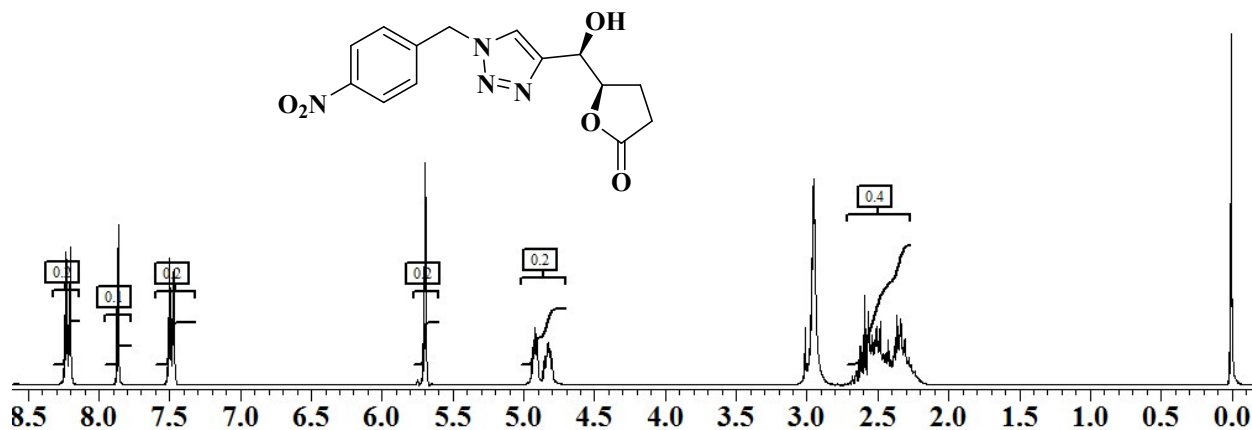

<sup>1</sup>H NMR SPECTRUM (300 MHz, CDCl<sub>3</sub> + DMSO-d<sub>6</sub>)

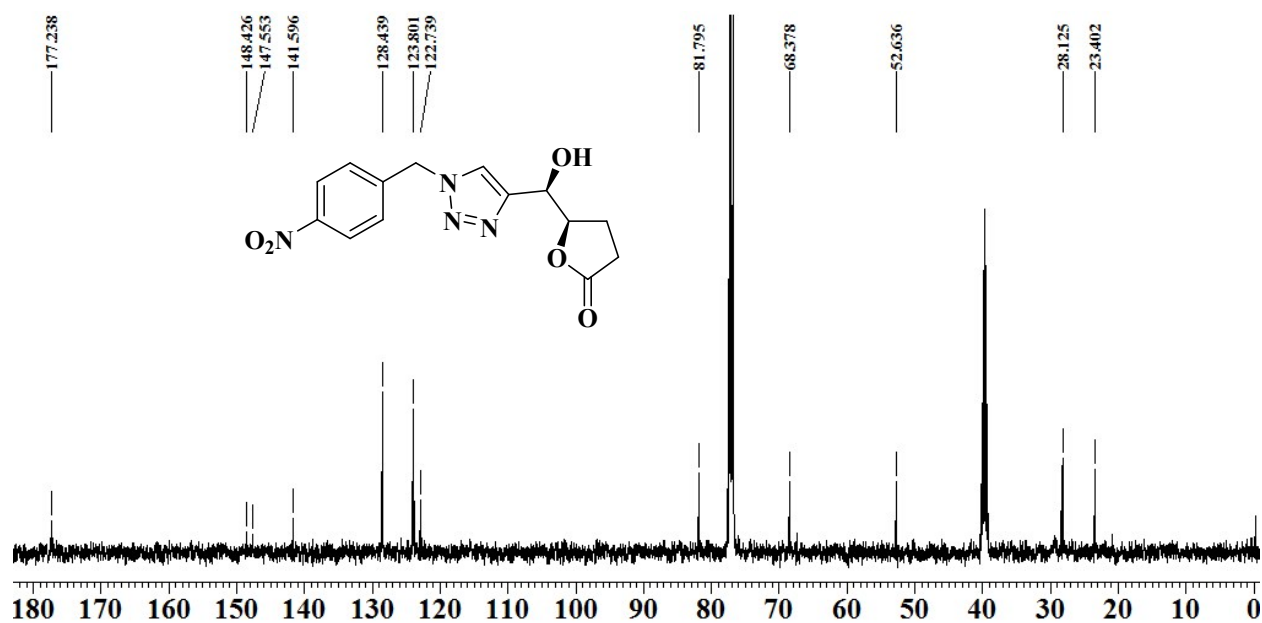

<sup>13</sup>C NMR SPECTRUM (125 MHz, CDCl<sub>3</sub> + DMSO-d<sub>6</sub>)
